# Supplementary material
Source: PubMed Central journal article supplement (PMC4020353)
Supplement: NIHMS573941-supplement-SI.pdf [file NIHMS573941-supplement-SI.pdf]

# CHEMISTRY

---

## A EUROPEAN JOURNAL

---

### Supporting Information

© Copyright Wiley-VCH Verlag GmbH & Co. KGaA, 69451 Weinheim, 2014

### **Synthesis and Reactivity Comparisons of 1-Methyl-3-Substituted Cyclopropene Mini-tags for Tetrazine Bioorthogonal Reactions**

Jun Yang,<sup>[a, c]</sup> Yong Liang,<sup>[b]</sup> Jolita Šečkutė,<sup>[a]</sup> K. N. Houk,<sup>\*,[b]</sup> and Neal K. Devaraj<sup>\*,[a]</sup>

chem\_201304225\_sm\_miscellaneous\_information.pdf

## Table of Contents

|                                                                                                        |    |
|--------------------------------------------------------------------------------------------------------|----|
| Experimental Section                                                                                   |    |
| 1. Synthesis of cyclopropene amine <b>6</b>                                                            | 2  |
| 2. Synthesis of compound <b>7</b>                                                                      | 2  |
| 3. Synthesis of compound <b>8</b>                                                                      | 3  |
| 4. Synthesis of compound <b>9</b>                                                                      | 3  |
| 5. Synthesis of compound <b>10</b>                                                                     | 4  |
| 6. Synthesis of compound <b>11</b>                                                                     | 4  |
| 7. Synthesis of compound <b>12</b>                                                                     | 5  |
| 8. Synthesis of compound <b>13</b>                                                                     | 5  |
| 9. Synthesis of cyclopropene aldehyde <b>14</b> and compound <b>15</b>                                 | 5  |
| 10. Synthesis of compound <b>17</b>                                                                    | 6  |
| 11. Synthesis of compound <b>19</b>                                                                    | 7  |
| 12. Synthesis of tetrazine <b>22</b>                                                                   | 7  |
| 13. Synthesis of tetrazine <b>26</b>                                                                   | 8  |
| 14. Synthesis of methylcyclopropene amide tag <b>35</b>                                                | 8  |
| 15. Tetrazine stability                                                                                | 9  |
| 16. Modified oligonucleotide synthesis, characterization, and stability                                | 10 |
| 17. Characterization of the reaction between tetrazine <b>26</b> and methylcyclopropene amide <b>8</b> | 12 |
| Computational Section                                                                                  |    |
| 1. Computational details and references                                                                | 13 |
| 2. Coordinates and energies of stationary points                                                       | 14 |
| <sup>1</sup> H NMR and <sup>13</sup> C NMR Spectra                                                     | 32 |
| LC/MS spectra of the product of tetrazine <b>26</b> reacting with methylcyclopropene <b>8</b>          | 58 |

## Experimental Section

### 1. Synthesis of cyclopropene amine 6

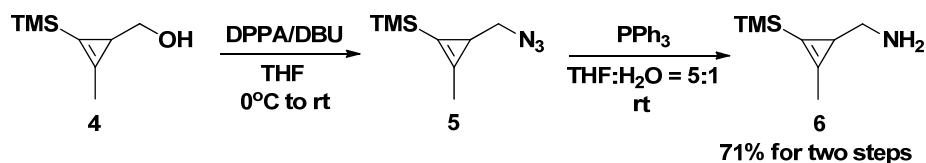

Under the protection of the N<sub>2</sub> gas, to a stirred solution of cyclopropene alcohol **4** (0.50 g, 3.2 mmol) in dry THF (10.0 mL) at 0 °C was added DBU (0.63 g, 4.2 mmol) followed by DPPA (diphenylphosphoryl azide, 1.14 g, 4.2 mmol). The reaction solution was slowly warmed to room temperature and stirred overnight. After TLC indicated that the reaction had completed, most of the THF was evaporated by flushing compressed air and the material was passed through a short silica column using hexanes. The product was collected and the hexanes were evaporated by rotary evaporation at 100 torr, room temperature, affording crude cyclopropene azide **5**. The crude cyclopropene azide **5** was dissolved in 5.0 mL THF and 1.0 mL H<sub>2</sub>O, PPh<sub>3</sub> (1.10 g, 4.2 mmol) was added to the solution and stirred at room temperature overnight. After TLC indicated that the reaction was finished, 5.0 mL of 1 M HCl was added to the reaction solution. The THF was evaporated and the aqueous solution was extracted with Et<sub>2</sub>O (5 mL x 3). The pH of the water layer was adjusted to pH 9 with sat. NaHCO<sub>3</sub> and extracted with CH<sub>2</sub>Cl<sub>2</sub> (10 mL x 3). The organic fractions were combined and dried over Na<sub>2</sub>SO<sub>4</sub>, evaporated at 100 torr, room temperature to afford 355 mg product **6** as yellow oil in 71% yield over two steps.

Cyclopropene azide **5**:

<sup>1</sup>H NMR (500 MHz, CDCl<sub>3</sub>) δ 0.17 (s, 9H), 1.57 (m, 1H), 2.22 (s, 3H), 3.01 (dd, *J* = 15, 5 Hz, 1H), 3.14 (dd, *J* = 15, 5 Hz, 1H); <sup>13</sup>C (125 MHz, CDCl<sub>3</sub>) δ -1.3, 13.8, 18.7, 59.9, 112.5, 134.9.

Cyclopropene amine **6**:

<sup>1</sup>H NMR (500 MHz, CDCl<sub>3</sub>) δ 0.14 (s, 9H), 1.43 (bs, 1H), 2.18 (s, 3H), 2.57 (bs, 2H); <sup>13</sup>C (125 MHz, CDCl<sub>3</sub>) δ -0.79, 13.7, 23.5, 48.9, 112.7, 136.9; HRMS [M+H]<sup>+</sup> *m/z* calcd. for [C<sub>8</sub>H<sub>18</sub>NSi]<sup>+</sup> 156.1203, found 156.1204.

### 2. Synthesis of compound 7

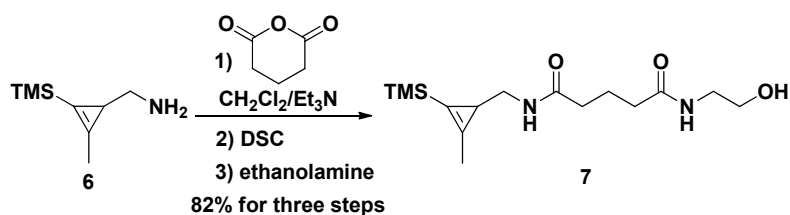

Cyclopropene amine **6** (10.0 mg, 0.065 mmol) was dissolved in CH<sub>2</sub>Cl<sub>2</sub> followed by addition of Et<sub>3</sub>N (13.0 mg, 0.13 mmol) and glutaric anhydride (11.0 mg, 0.1 mmol). This solution was stirred for 1 hr at room temperature after which *N,N'*-disuccinimidyl carbonate (26.0 mg, 0.1 mmol) was added. The reaction solution was stirred at room temperature for 1 hour after which ethanolamine (6.0 mg, 0.1 mmol) was added. The resulting solution was stirred for an additional hour at room temperature. After evaporating the organic solvent, the residue was purified by preparative TLC (CH<sub>2</sub>Cl<sub>2</sub>/MeOH=10/1) to afford 16.0 mg of compound **7** as a colorless oil, in 82 % yield.

<sup>1</sup>H NMR (500 MHz, CDCl<sub>3</sub>) δ 0.15 (s, 9H), 1.43 (bs, 1H), 1.97 (bs, 2H), 2.17 (s, 3H), 2.27 (m, 4H), 3.04 (bs, 1H), 3.18 (bs, 1H), 3.41 (bs, 2H), 3.71 (bs, 2H), 5.84 (bs, 1H), 6.73 (bs, 1H); <sup>13</sup>C (125 MHz, CDCl<sub>3</sub>) δ -0.86, 13.4, 19.3, 22.3, 29.9, 35.5, 42.8, 46.7, 62.4, 111.9, 135.9, 174.4, 176.7; HRMS [M+Na]<sup>+</sup> *m/z* calcd. for [C<sub>15</sub>H<sub>28</sub>N<sub>2</sub>O<sub>3</sub>SiNa]<sup>+</sup> 335.1761, found 335.1762.

### 3. Synthesis of compound **8**

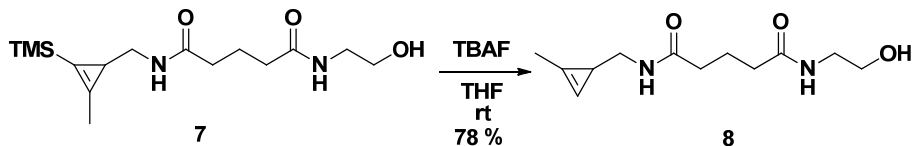

0.05 mL 1.0 M TBAF in THF (0.05 mmol) was added to a stirred solution of compound **7** (15.0 mg, 0.048 mmol) in dry THF (3.0 mL) at room temperature. The reaction solution was stirred at room temperature overnight until the TLC indicated that the starting material was consumed. The organic solvent was evaporated and the residue purified by preparative TLC ( $\text{CH}_2\text{Cl}_2/\text{MeOH} = 10/1$ ) to afford 9.0 mg compound **8** as colorless oil, in 78% yield.

$^1\text{H}$  NMR (500 MHz,  $\text{CDCl}_3$ )  $\delta$  1.54 (m, 1H), 1.94 (m, 2H), 2.11 (s, 3H), 2.24 (m, 4H), 3.11 (m, 1H), 3.22 (m, 1H), 3.40 (m, 2H), 3.71 (m, 2H), 5.86 (bs, 1H), 6.58 (s, 1H), 6.64 (bs, 1H);  $^{13}\text{C}$  (125 MHz,  $\text{CDCl}_3$ )  $\delta$  11.8, 18.0, 22.3, 29.9, 35.6, 42.7, 45.6, 62.4, 103.0, 121.7, 173.0, 174.0; HRMS  $[\text{M}+\text{Na}]^+$   $m/z$  calcd. for  $[\text{C}_{12}\text{H}_{20}\text{N}_2\text{O}_3\text{Na}]^+$  263.1366, found 263.1367.

### 4. Synthesis of compound **9**

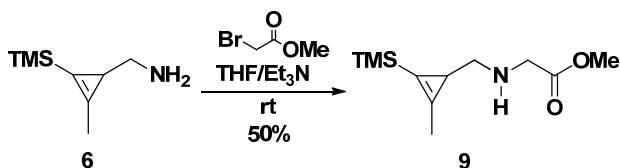

$\text{Et}_3\text{N}$  (101 mg, 1.0 mmol) was added to a stirred solution of compound **6** (130 mg, 0.84 mmol) and methyl bromoacetate (140 mg, 0.84 mmol) in dry THF (3.0 mL) at room temperature. After the reaction solution was stirred at room temperature for 1 hour, LC-MS indicated that there was unreacted starting material **6**, product **9** and a dialkylation product, with **9** as the majority product. Without workup, the residue was directly purified using preparative TLC (EtOAc) to afford 85 mg compound **9**, in 50% yield.

$^1\text{H}$  NMR (500 MHz,  $\text{CDCl}_3$ )  $\delta$  0.16 (s, 9H), 1.44 (t,  $J = 5$  Hz, 1H), 2.20 (s, 3H), 2.38 (dd,  $J = 10, 5$  Hz, 1H), 2.63 (dd,  $J = 10, 5$  Hz, 1H), 3.41 (d,  $J = 24$  Hz, 1H), 3.47 (d,  $J = 24$  Hz, 1H), 3.72 (s, 3H);  $^{13}\text{C}$  (125 MHz,  $\text{CDCl}_3$ )  $\delta$  -0.83, 13.6, 20.0, 50.5, 52.0, 57.4, 112.4, 136.6, 173.0; HRMS  $[\text{M}+\text{H}]^+$   $m/z$  calcd. for  $[\text{C}_{11}\text{H}_{22}\text{NO}_2]^+$  228.1414, found 228.1415.

## 5. Synthesis of compound 10

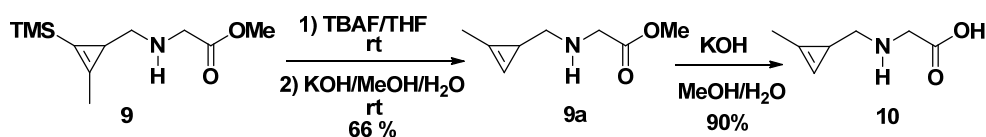

TBAF (0.26 mL, 1.0 M in THF) was added to a stirred solution of compound **9** (60.0 mg, 0.26 mmol) in dry THF (0.25 mL) at room temperature. The reaction solution was stirred at room temperature for 8 hours until the TLC indicated that the starting material was consumed. The solvent was evaporated and the residue was purified by preparative TLC (hexane/EtOAc = 2/1) to afford 27.0 mg compound **9a** as colorless oil, in 66 % yield. KOH (15 mg, 0.26 mmol) was added to a stirred solution of **9a** (20 mg, 0.13 mmol) in 0.5 mL MeOH/H<sub>2</sub>O (4/1) and the resulting solution was stirred overnight. The pH was adjusted to neutral by adding 0.26 mL 1 M HCl and the solution was evaporated to afford the crude product which was purified by preparative TLC (CH<sub>2</sub>Cl<sub>2</sub>/MeOH/H<sub>2</sub>O=10/2/0.2) to afford 16 mg of compound **10** as a white solid, in 90% yield.

### Compound **9a**:

<sup>1</sup>H NMR (500 MHz, CDCl<sub>3</sub>) δ 1.54 (m, 1H), 2.13 (s, 3H), 2.50 (dd, *J* = 10, 5 Hz, 1H), 2.59 (dd, *J* = 10, 5 Hz, 1H), 3.42 (s, 2H), 3.71 (s, 3H), 6.64 (s, 1H); <sup>13</sup>C (125 MHz, CDCl<sub>3</sub>) δ 12.1, 18.5, 50.7, 52.0, 56.4, 103.9, 122.3, 173.3.

### Compound **10**:

<sup>1</sup>H NMR (500 MHz, D<sub>2</sub>O/DMSO-*d*<sub>6</sub> = 5/1) δ 1.48 (m, 1H), 2.02 (s, 3H), 2.72 (dd, *J* = 10, 5 Hz, 1H), 2.94 (dd, *J* = 10, 5 Hz, 1H), 3.47 (d, *J* = 15 Hz, 1H), 3.51 (d, *J* = 15 Hz, 1H), 6.65 (s, 1H); <sup>13</sup>C (125 MHz, CDCl<sub>3</sub>) δ 12.1, 15.0, 49.7, 50.3, 56.1, 102.6, 121.4, 172.2.

## 6. Synthesis of compound 11

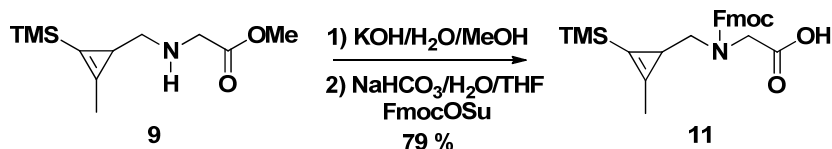

KOH (0.1 mL, 2.0 M KOH/H<sub>2</sub>O) was added to a stirred solution of compound **9** (20 mg, 0.088 mmol) in MeOH (3.0 mL) at room temperature. The reaction solution was stirred at room temperature for 6 hours after which TLC indicated that the reaction had completed. The organic solvent was evaporated and the residue was dissolved in 2.0 mL THF. HCl (0.2 mL, 1.0 M HCl/H<sub>2</sub>O) was added followed by NaHCO<sub>3</sub> (15 mg in 0.1 mL H<sub>2</sub>O, 0.18 mmol). FmocOSu (33 mg, 0.1 mmol) was added and the resulting solution was stirred for 3 hours after which TLC indicated that the reaction had finished. The pH was adjusted to 5 by addition of HCl (0.5 mL, 1.0 M HCl/H<sub>2</sub>O) and the solution was extracted with EtOAc (10 mL x 2). The organic layers were combined, dried over Na<sub>2</sub>SO<sub>4</sub>, and evaporated to afford the crude product. The product was purified by preparative TLC (EtOAc) to afford 30 mg of compound **11**, in 79% yield.

<sup>1</sup>H NMR (500 MHz, CDCl<sub>3</sub>) δ 0.13 (s, 9H), 1.39 (bs, 1H), 2.14 (s, 3H), 2.80-2.89 (m, 1H), 3.61-3.68 (m, 1H), 3.88-4.21 (m, 3H), 4.42 (m, 2H), 7.27-7.73 (m, 8H); <sup>13</sup>C (125 MHz, CDCl<sub>3</sub>) δ -0.85, 13.5, 18.5, 29.9, 47.4, 55.7, 67.7, 111.8, 120.1, 125.1, 127.3, 136.2, 136.3, 141.5, 144.2, 156.0; HRMS [M+Na]<sup>+</sup> *m/z* calcd. for [C<sub>25</sub>H<sub>29</sub>NO<sub>4</sub>SiNa]<sup>+</sup> 458.1758, found 458.1759.

## 7. Synthesis of compound **12**

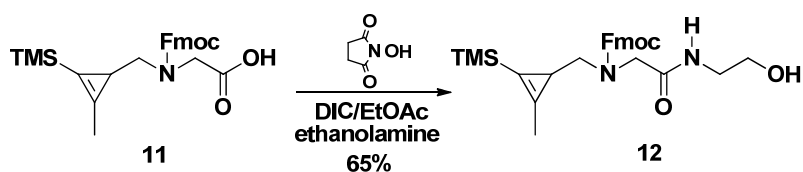

DIC (*N,N*-diisopropylcarbodiimide, 10.0 mg, 0.08 mmol) and *N*-Hydroxysuccinimide (9.0 mg, 0.08 mmol) was added to a stirred solution of compound **11** (27.0 mg, 0.06 mmol) in EtOAc (2.0 mL) at room temperature. The reaction solution was stirred at room temperature for 30 minutes after which ethanolamine (5.0 mg, 0.08 mmol) was added. After stirring at room temperature for an additional 30 minutes, the reaction solution was washed with water and the organic layer was dried over Na<sub>2</sub>SO<sub>4</sub> and evaporated. The residue was purified by preparative TLC (EtOAc) to afford 20 mg of compound **12** in 65% yield.

<sup>1</sup>H NMR (500 MHz, CDCl<sub>3</sub>) δ 0.14 (s, 9H), 1.34 (bs, 1H), 2.14 (s, 3H), 2.60-2.64 (m, 1H), 3.32-3.39 (m, 2H), 3.63-3.88 (m, 5H), 4.22 (bs, 1H), 4.46-4.52 (m, 2H) 7.30-7.77 (m, 8H); <sup>13</sup>C (125 MHz, CDCl<sub>3</sub>) δ -1.00, 13.3, 18.5, 29.8, 42.5, 47.4, 56.1, 62.2, 67.8, 111.6, 120.1, 124.9, 127.1, 127.9, 136.0, 141.4, 143.9, 157.1, 170.6; HRMS [M+Na]<sup>+</sup> m/z calcd. for [C<sub>27</sub>H<sub>34</sub>N<sub>2</sub>O<sub>4</sub>SiNa]<sup>+</sup> 501.2180, found 501.2181.

## 8. Synthesis of compound **13**

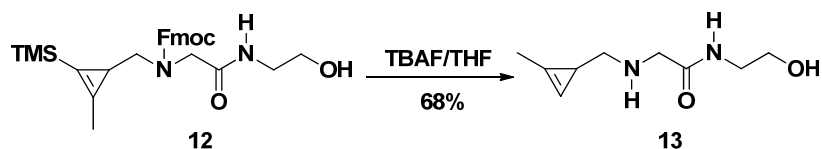

0.12 mL 1.0 M TBAF in THF (0.12 mmol) was added to a stirred solution of compound **12** (19.0 mg, 0.04 mmol) in dry THF (1.0 mL) at room temperature. The reaction solution was stirred at room temperature for 16 hours until the TLC indicated an absence of the starting material and intermediate. The organic solvent was evaporated and the residue was purified by preparative TLC (CH<sub>2</sub>Cl<sub>2</sub>/MeOH/CF<sub>3</sub>COOH = 70/10/0.5) to afford 5.0 mg of compound **13** as a white solid, in 68% yield.

<sup>1</sup>H NMR (500 MHz, acetone-*d*<sub>6</sub>) δ 1.66 (t, *J* = 5 Hz, 1H), 2.13 (s, 3H), 2.94 (dd, *J* = 15, 5 Hz, 1H), 3.09 (dd, *J* = 15, 5 Hz, 1H), 3.38 (bs, 2H), 3.60 (bs, 2H), 4.00 (bs, 2H), 6.78 (bs, 1H), 8.52 (bs, 1H); <sup>13</sup>C (125 MHz, CDCl<sub>3</sub>) δ 10.4, 13.8, 42.1, 47.6, 54.1, 55.1, 102.0, 120.1; HRMS [M+Na]<sup>+</sup> m/z calcd. for [C<sub>9</sub>H<sub>16</sub>N<sub>2</sub>O<sub>2</sub>Na]<sup>+</sup> 207.1104, found 207.1105.

## 9. Synthesis of cyclopropene aldehyde **14** and compound **15**

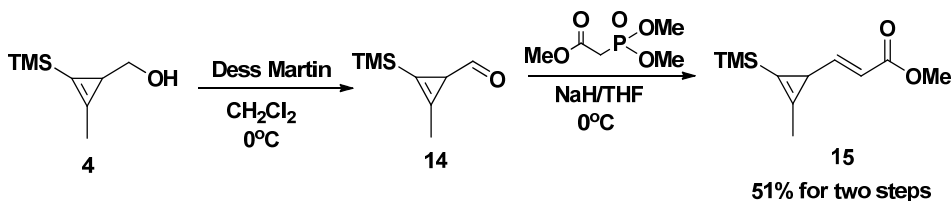

Dess-Martin reagent (750 mg, 1.75 mmol) was added to a stirred solution of compound cyclopropene **4** (250 mg, 1.6 mmol) in CH<sub>2</sub>Cl<sub>2</sub> (10.0 mL) at 0°C. The reaction solution was stirred at 0°C for one hour. The reaction was washed with sodium thiosulfate and sodium bicarbonate aqueous solution three times. The organic layer was collected and dried over Na<sub>2</sub>SO<sub>4</sub>, followed by evaporation at 100 torr. (room

temperature). This afforded the crude aldehyde **14**. Trimethyl phosphonoacetate (296 mg, 1.6 mmol) was dissolved in 10 mL dry THF and cooled to 0°C, NaH (60% in mineral oil, 64 mg, 1.6 mmol) was added and stirred at 0°C for 30 minutes. The crude aldehyde was added to the reaction solution and stirred at 0°C for one hour. The reaction was quenched with water and extracted with EtOAc (20 mL x 3). The organic layers were combined and washed with sat. NaCl solution before drying over Na<sub>2</sub>SO<sub>4</sub>. After filtration, the solution was evaporated and the residue purified by flash silica column (hexane/EtOAc = 10/1) to afford 172 mg compound of **15**, in 51% yield.

#### Compound **14**

<sup>1</sup>H NMR (500 MHz, CDCl<sub>3</sub>) δ 0.21 (s, 9H), 2.18 (d, *J* = 10 Hz, 1H), 2.27 (s, 3H), 8.69 (d, *J* = 10Hz, 1H); <sup>13</sup>C (125 MHz, CDCl<sub>3</sub>) δ -1.6, 13.3, 35.2, 105.7, 123.9, 206.2.

#### Compound **15**

<sup>1</sup>H NMR (500 MHz, CDCl<sub>3</sub>) δ 0.15 (s, 9H), 2.05 (d, *J* = 10 Hz, 1H), 2.17 (s, 3H), 3.68 (s, 3H), 5.78 (d, *J* = 15 Hz, 1H), 6.64 (dd, *J* = 15, 10 Hz, 1H); <sup>13</sup>C (125 MHz, CDCl<sub>3</sub>) δ -1.3, 12.7, 24.2, 51.2, 110.5, 115.0, 130.3, 160.4, 167.8; HRMS [M+H]<sup>+</sup> *m/z* calcd. for [C<sub>11</sub>H<sub>19</sub>O<sub>2</sub>Si]<sup>+</sup> 211.1149, found 211.1150.

### 10. Synthesis of compound **17**

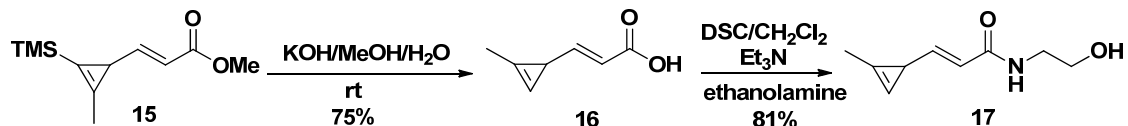

KOH (0.8 mL, 2.0 M KOH/H<sub>2</sub>O) was added to a stirred solution of compound **15** (100 mg, 0.48 mmol) in MeOH (4.0 mL) at room temperature. The reaction solution was stirred at room temperature overnight. The organic solvent was evaporated and the residue was dissolved in EtOAc and washed with 1 M HCl. The organic layer was dried over Na<sub>2</sub>SO<sub>4</sub> and evaporated to afford crude compound **16**. The crude product was purified by preparative TLC (CH<sub>2</sub>Cl<sub>2</sub>/MeOH=10/1) to afford 44 mg of compound **16** as a colorless oil, in 75% yield. Compound **16** (10 mg, 0.08 mmol) was dissolved in CH<sub>2</sub>Cl<sub>2</sub> and, to this solution, Et<sub>3</sub>N (10 mg, 0.1 mmol) and DSC (*N,N'*-disuccinimidyl carbonate, 26 mg, 0.1 mmol) were added. The resulting solution was stirred for 30 min after which ethanolamine (6 mg, 0.1 mmol) was added. The reaction was stirred at room temperature for an additional 1 hour. The organic solvent was evaporated and the residue was purified by preparative TLC (EtOAc) to afford 11 mg of compound **17** as a colorless oil, in 81% yield.

#### Compound **16**

<sup>1</sup>H NMR (500 MHz, CDCl<sub>3</sub>) δ 2.16 (s, 3H), 2.19 (d, *J* = 10Hz, 1H), 5.86 (d, *J* = 15 Hz, 1H), 6.56 (s, 1H), 6.73 (dd, *J* = 15, 10 Hz, 1H); <sup>13</sup>C (125 MHz, CDCl<sub>3</sub>) δ 11.3, 22.5, 100.7, 116.3, 118.5, 161.7, 172.1; HRMS [M-H]<sup>-</sup> *m/z* calcd. for [C<sub>7</sub>H<sub>7</sub>O<sub>2</sub>]<sup>-</sup> 123.0452, found 123.0453.

#### Compound **17**

<sup>1</sup>H NMR (400 MHz, CDCl<sub>3</sub>) δ 2.13 (s, 3H), 2.15 (d, *J* = 8 Hz, 1H), 2.21 (bs, 1H), 3.48 (t, *J* = 6 Hz, 2H), 3.73 (t, *J* = 6 Hz, 2H), 5.85 (d, *J* = 20 Hz, 1H), 5.97 (bs, 1H), 6.53 (dd, *J* = 20, 12 Hz, 1H), 6.56 (s, 1H); <sup>13</sup>C (125 MHz, CDCl<sub>3</sub>) δ 11.3, 22.0, 42.7, 62.9, 102.3, 118.9, 119.1, 154.7, 167.8; HRMS [M+H]<sup>+</sup> *m/z* calcd. for [C<sub>9</sub>H<sub>13</sub>NO<sub>2</sub>Na]<sup>+</sup> 190.0838, found 190.0839.

## 11. Synthesis of compound 19

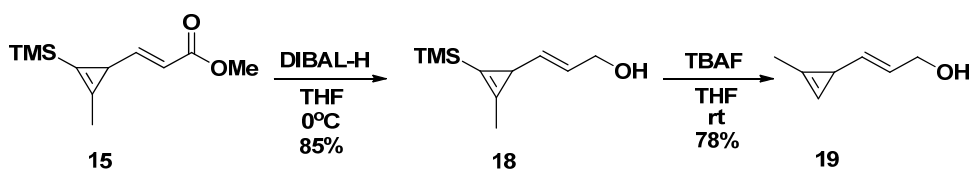

DIBAL-H (1.0M, 0.44 mL) was added to a stirred solution of compound **15** (50 mg, 0.24 mmol) in dry THF (2.0 mL) at 0°C. The reaction was stirred at 0°C for 1 hour and then quenched by addition of 0.1 mL water. The solution was filtered and the organic solvent evaporated to afford the crude product. The residue was purified by preparative TLC (hexane/EtOAc = 5:1) to give 36 mg of compound **18** as a yellow oil, in 85% yield. Compound **18** (20 mg, 0.11 mmol) was dissolved in 0.3 mL THF and TBAF (1.0 M in THF, 0.12 mL) was added. The solution was stirred at room temperature overnight. The solvent was evaporated and the residue was purified by preparative TLC (hexane/EtOAc = 3:1) to afford 9.0 mg of compound **19** as a yellow oil, in 78 % yield.

### Compound 18

$^1\text{H NMR}$  (500 MHz,  $\text{CDCl}_3$ )  $\delta$  0.15 (s, 9H), 1.93 (d,  $J = 10$  Hz, 1H), 2.16 (s, 3H), 4.04 (d,  $J = 10$  Hz, 2H), 5.26 (dd,  $J = 20, 10$  Hz, 1H), 5.64 (dd,  $J = 20, 10$  Hz, 1H);  $^{13}\text{C}$  (125 MHz,  $\text{CDCl}_3$ )  $\delta$  -0.91, 12.8, 23.0, 64.3, 111.7, 124.2, 133.1, 143.0.

### Compound 19

$^1\text{H NMR}$  (500 MHz,  $\text{CDCl}_3$ )  $\delta$  2.03 (d,  $J = 5$  Hz, 1H), 2.12 (s, 3H), 4.07 (d,  $J = 10$  Hz, 2H), 5.30 (dd,  $J = 15, 5$  Hz, 1H), 5.70 (dd,  $J = 15, 5$  Hz, 1H), 6.58 (s, 1H);  $^{13}\text{C}$  (125 MHz,  $\text{CDCl}_3$ )  $\delta$  11.3, 21.2, 63.9, 102.3, 120.4, 125.5, 141.7.

## 12. Synthesis of tetrazine 22

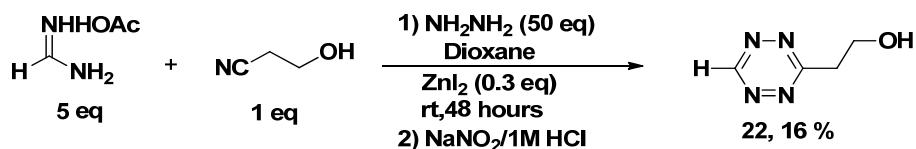

Tetrazine **22** was synthesized by adapting a previously described method (*Angew. Chem. Int. Ed.* **2012**, *51*, 5222–5225). Hydrazine (3.2 g, 100 mmol) was added to a stirring suspension of 3-hydroxypropionitrile (142 mg, 2 mmol), formamidine acetate (1.01 g, 10 mmol), and  $\text{ZnI}_2$  (200 mg, 0.6 mmol) in 1,4-dioxane (3 mL) at room temperature. The reaction was stirred at room temperature for 48 h. Sodium nitrite (20.0 mmol, 1.4 g) in 20 mL of water was slowly added to the solution and followed by slow addition of 1 M HCl during which the solution turned bright red in color and gas evolved. Addition of 1 M HCl continued until gas evolution ceased and the pH value was 3. (**Caution!** This step generates a large amount of toxic nitrogen oxide gasses and should be performed in a well ventilated fume hood). The mixture was extracted with EtOAc and the organic phase dried over sodium sulfate. The EtOAc was removed using rotary evaporation and the residue was purified by preparative TLC ( $\text{CH}_2\text{Cl}_2$ :MeOH = 30:1) to give 41 mg compound **22** as red oil, the yield is 16 %.  $^1\text{H NMR}$  (500 MHz,  $\text{CDCl}_3$ )  $\delta$  3.61–3.64 (m, 2H), 4.29 (bs, 2H), 10.26 (s, 1H);  $^{13}\text{C}$  (125 MHz,  $\text{CDCl}_3$ )  $\delta$  38.2, 60.1, 158.5, 171.6.



### 13. Synthesis of tetrazine **26**

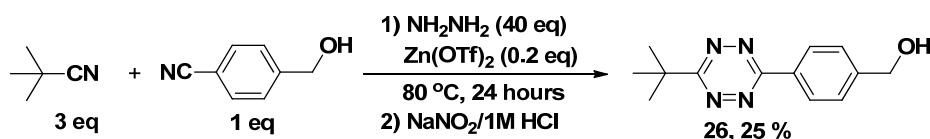

Tetrazine **26** was synthesized by adapting a previously described method (*Angew. Chem. Int. Ed.* **2012**, *51*, 5222–5225). Hydrazine (1.2 g, 25 mmol) was added to a stirring suspension of trimethylacetone nitrile (100 mg, 1.5 mmol), 4-cyanobenzyl alcohol (67 mg, 0.5 mmol), and Zn(OTf)<sub>2</sub> (200 mg, 0.6 mmol) at room temperature. The reaction was heated to 80 °C and stirred for 36 h. Sodium nitrite (4 mmol, 280 mg) in 10 mL of water was slowly added to the solution and followed by slow addition of 1 M HCl during which the solution turned bright red in color and gas evolved. Addition of 1 M HCl continued until gas evolution ceased and the pH value is 3. (**Caution!** This step generates a large amount of toxic nitrogen oxide gasses and should be performed in a well ventilated fume hood). The mixture was extracted with EtOAc and the organic phase dried over sodium sulfate. The EtOAc was removed using rotary evaporation and the residue was purified by preparative TLC (hexane/EtOAc = 1:1) to give 35 mg compound **26** as purple solid, the yield is 25 %. <sup>1</sup>H NMR (500 MHz, CDCl<sub>3</sub>) δ 1.62 (s, 9H), 4.03 (s, 2H), 7.58 (d, *J* = 10 Hz, 2H), 8.58 (d, *J* = 10 Hz, 2H); <sup>13</sup>C (125 MHz, CDCl<sub>3</sub>) δ 29.3, 38.0, 64.8, 127.5, 128.2, 131.1, 145.7, 163.5, 175.6. HRMS [M+H]<sup>+</sup> *m/z* calcd. for [C<sub>13</sub>H<sub>17</sub>N<sub>4</sub>O]<sup>+</sup> 245.1397, found 245.1395.

### 14. Synthesis of methylcyclopropene amide tag **35**

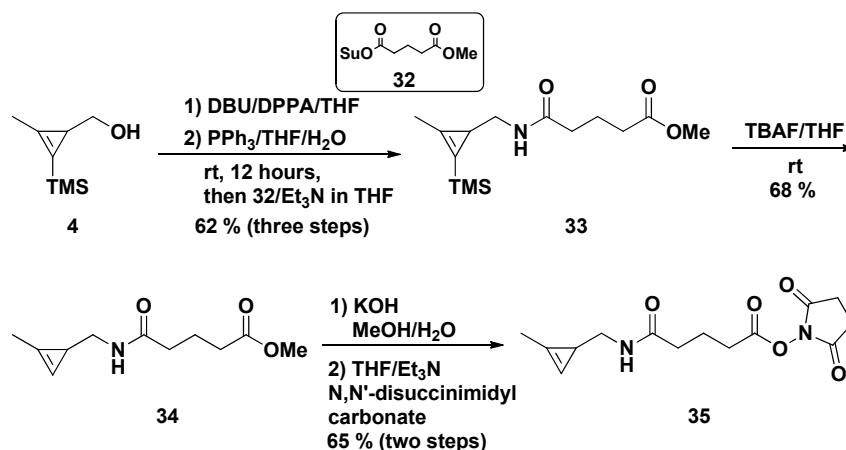

Under the protection of N<sub>2</sub>, to a stirred solution of cyclopropene alcohol **4** (90 mg, 0.58 mmol) in dry THF (3.0 mL) at 0 °C was added DBU (131 mg, 0.87 mmol) followed by DPPA (diphenylphosphoryl azide, 263 mg, 0.87 mmol). The reaction solution was slowly warmed to room temperature and stirred overnight. After TLC indicated that the reaction had completed, most of the THF was evaporated by flushing compressed air and the material was passed through a short silica column using hexanes. The product was collected and the hexanes were evaporated by rotary evaporation at 100 torr, room temperature, affording crude cyclopropene azide **5**. The crude cyclopropene azide **5** was dissolved in 4.0 mL THF and 0.6 mL H<sub>2</sub>O, PPh<sub>3</sub> (227 mg, 0.87 mmol) was added to the solution and stirred at room temperature overnight. After TLC indicated that the reaction was finished, compound **32** (140 mg, 0.58 mmol) and Et<sub>3</sub>N (60 mg, 0.58 mmol) in 2 mL THF was added and stirred at room temperature for 20 minutes. The THF was evaporated and 10 mL water was added, the aqueous solution was extracted with EtOAc (10 mL × 3). The organic fractions were combined and dried over Na<sub>2</sub>SO<sub>4</sub>, evaporated to afford crude product. The crude product was purified by silica column (Hexane:Acetone = 3:1) to afford 120 mg product **33** as yellow oil in 62 % yield over three steps. <sup>1</sup>H NMR (500 MHz, CDCl<sub>3</sub>) δ 1.41 (t, *J* = 10 Hz, 1H), 1.91-1.97 (m, 2H), 2.15 (s, 3H), 2.16-2.19 (m, 2H), 2.36 (t, *J* = 8 Hz, 2H), 3.03-3.08 (m, 1H), 3.14-3.19 (m, 1H), 3.64 (s, 3H), 5.41

(bs, 1H);  $^{13}\text{C}$  (125 MHz,  $\text{CDCl}_3$ )  $\delta$  -0.9, 13.4, 19.4, 21.2, 33.3, 35.8, 46.3, 51.8, 111.8, 136.1, 171.9, 173.9. HRMS  $[\text{M}+\text{H}]^+$   $m/z$  calcd. for  $[\text{C}_{14}\text{H}_{26}\text{NO}_3\text{Si}]^+$  284.1674, found 284.1675.

TBAF (0.35 mL, 1.0 M in THF) was added to a stirred solution of compound **33** (100.0 mg, 0.35 mmol) in dry THF (2.0 mL) at room temperature. The reaction solution was stirred at room temperature for 30 minutes until the TLC indicated that the starting material was consumed. The solvent was evaporated and the residue was purified by silica column (hexane/acetone = 2/1) to afford 50 mg compound **34** as colorless oil, in 68 % yield.  $^1\text{H}$  NMR (400 MHz,  $\text{CDCl}_3$ )  $\delta$  1.49-1.51 (m, 1H), 1.89 (m, 2H), 2.08 (s, 3H), 2.17 (t,  $J$  = 8 Hz, 2H), 2.34 (t,  $J$  = 8 Hz, 2H), 3.07-3.13 (m, 1H), 3.18 (m, 1H), 3.63 (s, 3H), 5.62 (bs, 1H), 6.54 (s, 1H);  $^{13}\text{C}$  (100 MHz,  $\text{CDCl}_3$ )  $\delta$  11.8, 18.1, 21.2, 33.3, 35.8, 45.3, 51.8, 103.0, 121.7, 172.2, 174.0. HRMS  $[\text{M}+\text{H}]^+$   $m/z$  calcd. for  $[\text{C}_{11}\text{H}_{18}\text{NO}_3]^+$  212.1281, found 212.1280.

KOH (18 mg, 0.32 mmol) was added to a stirred solution of **34** (45 mg, 0.21 mmol) in 2.0 mL MeOH/ $\text{H}_2\text{O}$  (4/1) and the resulting solution was stirred overnight. The pH was adjusted to neutral by adding 0.32 mL 1 M HCl and the solution was evaporated to afford carboxylic acid intermediate. The crude intermediate was dissolved in THF (5 mL) and followed by addition of  $\text{Et}_3\text{N}$  (32 mg, 0.32 mmol) and  $\text{N,N}'$ -disuccinimidyl carbonate (54 mg, 0.21 mmol). The solution was stirred at room temperature for 5 hours and worked up by addition of brine (20 mL) and extracted by EtOAc (20 mL  $\times$  3). The combined organic layer was washed by brine (60 mL) and dried over  $\text{Na}_2\text{SO}_4$ , evaporated in vacuum to afford crude product. The crude product was purified by silica column (EtOAc) to afford 40 mg compound **35** as colorless oil, yield is 65 % for two steps.  $^1\text{H}$  NMR (500 MHz,  $\text{CDCl}_3$ )  $\delta$  1.49-1.51 (m, 1H), 2.06-2.08 (m, 2H), 2.08 (s, 3H), 2.25 (t,  $J$  = 7.5 Hz, 2H), 2.64 (t,  $J$  = 7.5 Hz, 2H), 2.82 (bs, 4H), 3.09-3.22 (m, 4H), 5.86 (bs, 1H), 6.54 (s, 1H);  $^{13}\text{C}$  (100 MHz,  $\text{CDCl}_3$ )  $\delta$  11.7, 17.9, 21.0, 25.7, 30.0, 34.7, 45.3, 102.9, 121.6, 168.5, 169.4, 171.5. HRMS  $[\text{M}+\text{H}]^+$   $m/z$  calcd. for  $[\text{C}_{14}\text{H}_{19}\text{N}_2\text{O}_5]^+$  295.1292, found 295.1291.

## 15. Tetrazine stability

Tetrazine compounds **24**, **25**, and **26** at 1 mM concentration were incubated at room temperature in 50% DMF, 50% PBS pH 7.4 with and without 1 mM cysteine. Samples with 1 mM cysteine were incubated for 3 hours (Figure S1a), samples in DMF/PBS were left at room temperature for 48 hours (Figure S1b). The decomposition of tetrazine was determined by monitoring the disappearance of the characteristic tetrazine absorption maximum between 527-529 nm.

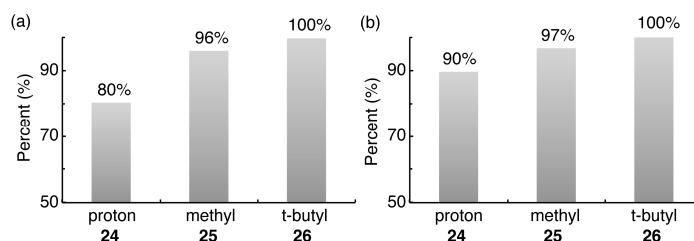

**Figure S1.** Tetrazine series stability over time. Tetrazines **24** (proton), **25** (methyl), and **26** (t-butyl) stability in 50% DMF, 50% PBS pH 7.4. (a) Tetrazine samples at 1 mM were incubated with 1 mM cysteine for 3 hours at room temperature. (b) Tetrazine samples at 1 mM were incubated at room temperature for 48 hours.

## 16. Modified oligonucleotide synthesis, characterization, and stability

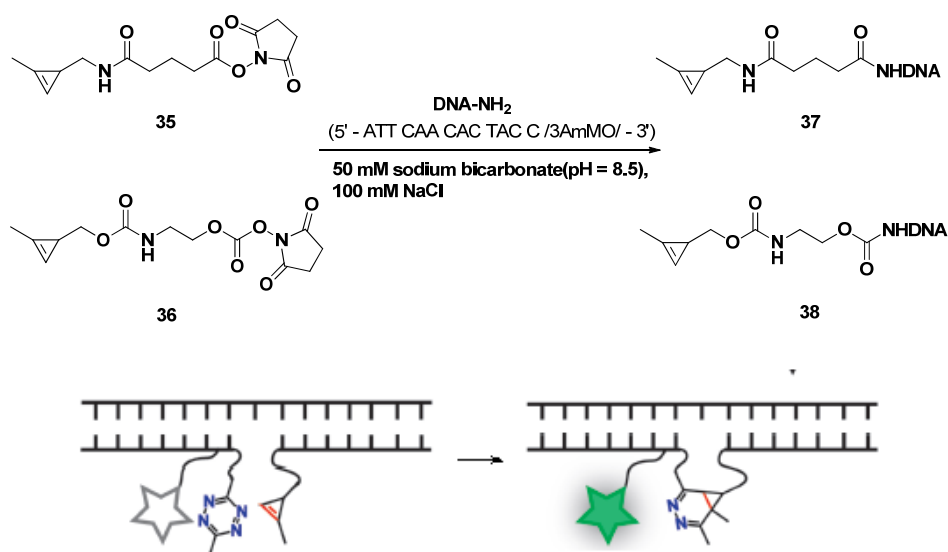

Amine-modified 13-nucleotide DNA sequence was purchased from Integrated DNA Technologies, Inc, as 5' - ATT CAA CAC TAC C /3AmMO/ - 3'. Cyclopropene carbamate NHS ester (N-hydroxysuccinimide) **36** was reacted in excess with the terminal amine of the oligonucleotide in order to afford the conjugated cyclopropene probe **38**, as described in reference (*Nucleic Acids Res.* **2013**, *41*, e148). Cyclopropene **35** was conjugated in a similar manner. Resulting DNA probes were purified by HPLC, lyophilized, and resuspended in ddi H<sub>2</sub>O for storage. Probe molecular weights were confirmed by ionization spray mass spectrometry. For cyclopropene **37** calculated MW was 4252.9, observed m/2 1419.3, m/3 1068.5 (Figure S2a). For cyclopropene carbamate **38** calculated MW was 4270.9, observed m/2 1422.4, m/3 1067.0. Cyclopropene carbamate **38** was further confirmed by MALDI MS, shown in reference (*Nucleic Acids Res.* **2013**, *41*, e148).

Each DNA cyclopropene probe at 1  $\mu$ M in 50 mM MOPS pH 7.5, 250 mM NaCl was incubated with 1  $\mu$ M DNA template that contains a fully complementary region for cyclopropene probe hybridization, as well as a neighboring region that allows for a tetrazine-25-modified 13 nucleotide fluorescein in DNA probe as described in reference (*Nucleic Acids Res.* **2013**, *41*, e148). Resultant tetrazine-cyclopropene click reaction was studied as a function of the unquenching of the fluorescein emission (Figure 3). The product of the reaction between cyclopropene carbamate **38** and tetrazine **25** modified DNA probes was confirmed by MALDI MS, shown in reference (*Nucleic Acids Res.* **2013**, *41*, e148). The corresponding product, obtained using cyclopropene amide **37** DNA probe was confirmed by the ionization spray MS, shown in Figure S2b.

DNA probe stability was tested after multiple freeze/thaw cycles (5-7 times frozen at -80°C, defrosted to room temperature for experiments, and frozen again). HPLC traces of freshly purified samples are compared with the final traces in Figure 3.

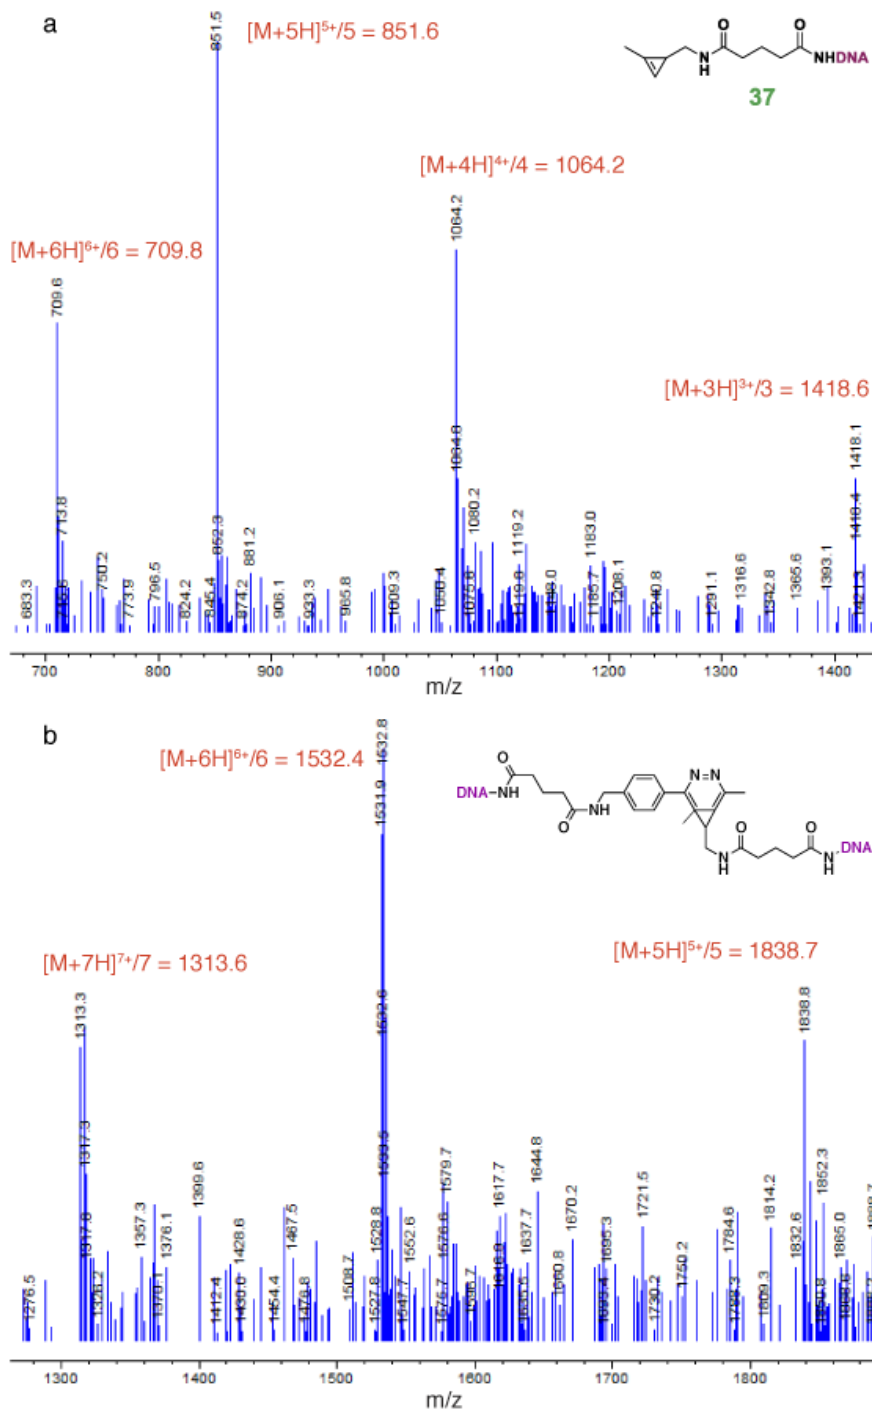

**Figure S2.** Molecular weight confirmation of the cyclopropene amide **37** DNA probe reaction by ionization spray MS. (a) Reactant cyclopropene amide **37** modified 13 nt DNA probe with a calculated MS of 4252.9, with the corresponding peaks indicated. (b) Product of the templated click reaction of a 13 nt fluorescently-labeled tetrazine **25** and a 13 nt cyclopropene **37** modified DNA probes along a matching template strand. Calculated product MS is 9188.5, with the corresponding peaks indicated.

17. Characterization of the reaction between tetrazine **26** and methylcyclopropene amide **8**

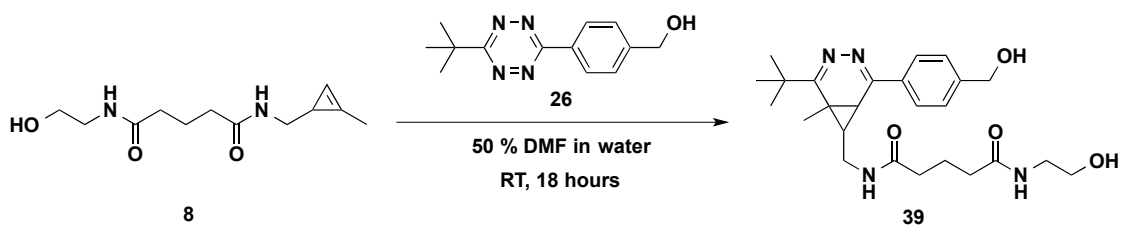

Tetrazine **26** (100 mM in dry DMF, 5  $\mu$ L) and methylcyclopropene amide **8** (250 mM in DMF, 2.2  $\mu$ L) were combined in 250  $\mu$ L of H<sub>2</sub>O and 243  $\mu$ L DMF at a final concentration of 1 mM for tetrazine **26** and 1.1 mM for cyclopropene **8**. The reaction solution was agitated for 18 hours at room temperature then analyzed by LC-MS. Only one isomer of product **39** is depicted. The LC-MS trace of **26** and **39** are shown in Figure 4. The mass spectrum of **39** is included on page 58.

## Computational Section

### 1. Computational details and references

All calculations were performed with the Gaussian 09.<sup>[1]</sup> The geometry optimization of all the minima and transition states involved was carried out at the M06-2X level of theory<sup>[2]</sup> with the 6-31G(d) basis set.<sup>[3]</sup> The vibrational frequencies were computed at the same level to check whether each optimized structure is an energy minimum or a transition state and to evaluate its zero-point vibrational energy (ZPVE) and thermal corrections at 298 K. A quasiharmonic correction was applied during the entropy calculation by setting all positive frequencies that are less than 100 cm<sup>-1</sup> to 100 cm<sup>-1</sup>.<sup>[4]</sup> Solvent effects in water were computed at the M06-2X/6-311+G(d,p) level using the gas-phase optimized structures at the M06-2X/6-31G(d) level. Solvation energies were evaluated by a self-consistent reaction field (SCRF) using the CPCM model,<sup>[5]</sup> where UFF radii were used. Fragment distortion energies were computed at the M06-2X/6-311+G(d,p) level using the M06-2X/6-31G(d) geometries. The frontier molecular orbitals and their energies were computed at the HF/6-311+G(d,p) level using the M06-2X/6-31G(d) geometries and were shown in Figure S3. DFT calculations indicated that the electron rich substituents, such as methoxy and dimethylamino groups, would greatly decrease the tetrazine reactivity in the inverse-electron-demand Diels-Alder cycloaddition (Figure S4).

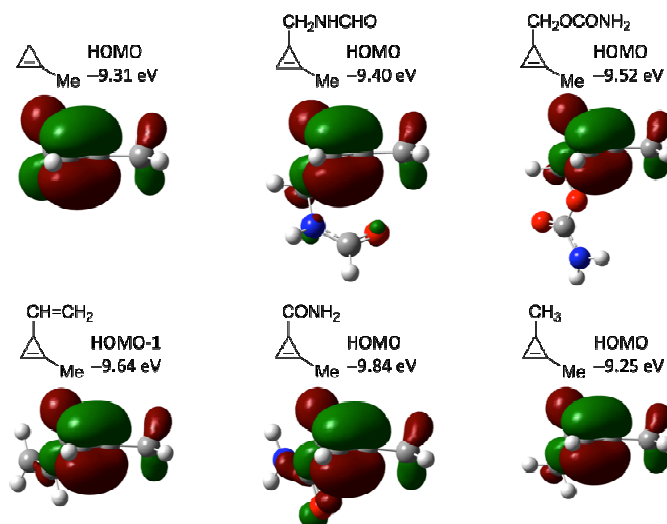

**Figure S3.** Frontier molecular orbitals and energies of cyclopropenes.

[1] M. J. Frisch, G. W. Trucks, H. B. Schlegel, G. E. Scuseria, M. A. Robb, J. R. Cheeseman, G. Scalmani, V. Barone, B. Mennucci, G. A. Petersson, H. Nakatsuji, M. Caricato, X. Li, H. P. Hratchian, A. F. Izmaylov, J. Bloino, G. Zheng, J. L. Sonnenberg, M. Hada, M. Ehara, K. Toyota, R. Fukuda, J. Hasegawa, M. Ishida, T. Nakajima, Y. Honda, O. Kitao, H. Nakai, T. Vreven, J. A. Montgomery, Jr., J. E. Peralta, F. Ogliaro, M. Bearpark, J. J. Heyd, E. Brothers, K. N. Kudin, V. N. Staroverov, T. Keith, R. Kobayashi, J. Normand, K. Raghavachari, A. Rendell, J. C. Burant, S. S. Iyengar, J. Tomasi, M. Cossi, N. Rega, J. M. Millam, M. Klene, J. E. Knox, J. B. Cross, V. Bakken, C. Adamo, J. Jaramillo, R. Gomperts, R. E. Stratmann, O. Yazyev, A. J. Austin, R. Cammi, C. Pomelli, J. W. Ochterski, R. L. Martin, K. Morokuma, V. G. Zakrzewski, G. A. Voth, P. Salvador, J. J. Dannenberg, S. Dapprich, A. D. Daniels, O. Farkas, J. B. Foresman, J. V. Ortiz, J. Cioslowski, D. J. Fox, *Gaussian 09*, Revision C.01, Gaussian Inc.: Wallingford CT, **2010**.

[2] (a) Y. Zhao, D. G. Truhlar, *Theor. Chem. Acc.* **2008**, *120*, 215. (b) Y. Zhao, D. G. Truhlar, *Acc. Chem. Res.* **2008**, *41*, 157.

[3] W. J. Hehre, L. Radom, P. v. R. Schleyer, J. A. Pople, *Ab Initio Molecular Orbital Theory*, Wiley: New York, **1986**.

[4] (a) Y. Zhao, D. G. Truhlar, *Phys. Chem. Chem. Phys.* **2008**, *10*, 2813. (b) R. F. Ribeiro, A. V. Marenich, C. J. Cramer, D. G. Truhlar, *J. Phys. Chem. B* **2011**, *115*, 14556.

[5] (a) V. Barone, M. Cossi, *J. Phys. Chem. A* **1998**, *102*, 1995. (b) M. Cossi, N. Rega, G. Scalmani, V. Barone, *J. Comput. Chem.* **2003**, *24*, 669.

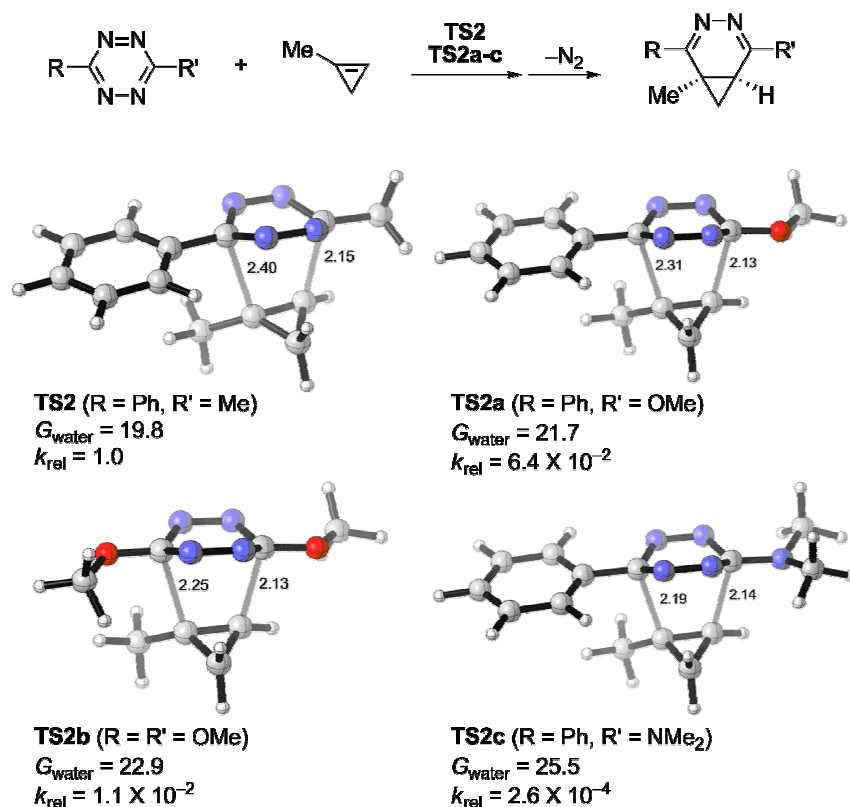

**Figure S4.** M06-2X/6-31G(d)-optimized transition-state structures for the Diels-Alder reactions of 3-methyl-6-phenyltetrazine and three electron-rich tetrazines with methylcyclopropene (distances in Å) and M06-2X/6-311+G(d,p)//6-31G(d)-computed activation free energies in water ( $G_{\text{water}}$ , in kcal mol<sup>-1</sup>) and relative rate constants ( $k_{\text{rel}}$ ).

## 2. Coordinates and energies of stationary points

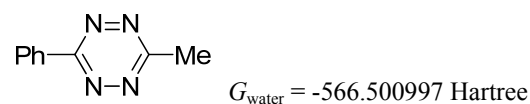

|   |           |           |           |
|---|-----------|-----------|-----------|
| C | 0.345704  | 0.001489  | -0.007820 |
| C | 2.914514  | 0.002002  | -0.004776 |
| N | 2.286373  | 1.185045  | -0.013603 |
| N | 0.978371  | 1.184179  | -0.014694 |
| N | 2.285782  | -1.182613 | -0.010781 |
| N | 0.979590  | -1.182536 | -0.011796 |
| C | -1.132554 | 0.000373  | -0.002316 |
| C | -1.832432 | -1.210453 | -0.000541 |
| C | -1.833907 | 1.210369  | 0.001671  |
| C | -3.222108 | -1.207236 | 0.005216  |
| H | -1.278576 | -2.142601 | -0.003913 |
| C | -3.223528 | 1.205487  | 0.007459  |
| H | -1.281016 | 2.143117  | -0.000140 |
| C | -3.919740 | -0.001315 | 0.009189  |
| H | -3.762260 | -2.148716 | 0.006646  |
| H | -3.764837 | 2.146294  | 0.010386  |

|   |           |           |           |
|---|-----------|-----------|-----------|
| H | -5.005486 | -0.001963 | 0.013630  |
| C | 4.409585  | -0.001802 | 0.025091  |
| H | 4.762236  | -0.135256 | 1.052977  |
| H | 4.794207  | -0.830688 | -0.571667 |
| H | 4.791714  | 0.947790  | -0.350841 |

-----

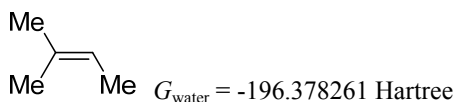

|   |           |           |           |
|---|-----------|-----------|-----------|
| C | -0.445730 | -0.042741 | -0.000029 |
| C | 0.731532  | -0.675726 | -0.000007 |
| H | 0.708234  | -1.766046 | -0.000049 |
| C | 2.107239  | -0.076288 | 0.000005  |
| H | 2.096599  | 1.015200  | -0.000096 |
| H | 2.672697  | -0.404630 | 0.879758  |
| H | 2.672878  | -0.404869 | -0.879548 |
| C | -0.623413 | 1.452372  | 0.000003  |
| H | 0.319449  | 2.000814  | 0.000110  |
| H | -1.198406 | 1.767176  | -0.879510 |
| H | -1.198634 | 1.767121  | 0.879384  |
| C | -1.739209 | -0.816056 | 0.000018  |
| H | -2.344365 | -0.564342 | 0.879873  |
| H | -2.344269 | -0.564417 | -0.879924 |
| H | -1.566694 | -1.895371 | 0.000066  |

-----

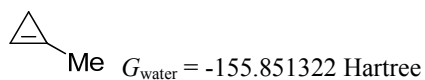

|   |           |           |           |
|---|-----------|-----------|-----------|
| C | -1.139229 | -0.675519 | -0.000018 |
| C | 0.154946  | 0.090503  | -0.000350 |
| C | -0.920209 | 0.809908  | 0.000056  |
| H | -1.471896 | -1.176296 | 0.913313  |
| H | -1.472177 | -1.176350 | -0.913211 |
| H | -1.404386 | 1.774021  | -0.000113 |
| C | 1.625469  | -0.067329 | 0.000149  |
| H | 2.132201  | 0.900741  | 0.000045  |
| H | 1.944834  | -0.633462 | 0.881439  |
| H | 1.945561  | -0.634037 | -0.880502 |

-----

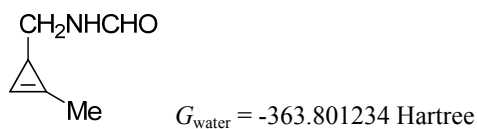

|   |           |           |           |
|---|-----------|-----------|-----------|
| C | -1.451005 | 0.033267  | 0.119178  |
| C | -1.344857 | -1.009359 | 0.883984  |
| C | -0.770228 | -1.154024 | -0.490421 |
| H | -1.538762 | -1.497708 | 1.827249  |
| H | -1.310601 | -1.741463 | -1.242235 |
| C | 0.740413  | -1.180168 | -0.749007 |
| H | 1.074921  | -2.209770 | -0.913010 |



|   |           |           |           |
|---|-----------|-----------|-----------|
| H | 0.977355  | -0.605066 | -1.648923 |
| C | -1.886296 | 1.419371  | -0.155945 |
| H | -2.574111 | 1.432637  | -1.007944 |
| H | -2.386964 | 1.859487  | 0.709700  |
| H | -1.012273 | 2.021908  | -0.419190 |
| C | 1.672162  | 0.717600  | 0.475498  |
| O | 1.297646  | 1.543042  | -0.335235 |
| N | 1.527969  | -0.622446 | 0.333803  |
| H | 1.730360  | -1.203149 | 1.134839  |
| H | 2.201986  | 0.995789  | 1.405052  |

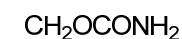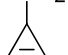

Me

$G_{\text{water}} = -439.038604$  Hartree

|   |           |           |           |
|---|-----------|-----------|-----------|
| C | -2.166718 | 0.175532  | 0.058874  |
| C | -2.006027 | -0.469760 | 1.170833  |
| C | -1.431480 | -1.126459 | -0.044027 |
| H | -2.131475 | -0.535413 | 2.240679  |
| C | 0.062086  | -1.177135 | -0.308638 |
| H | 0.539951  | -2.010779 | 0.217916  |
| H | 0.269937  | -1.302805 | -1.377421 |
| O | 0.637711  | 0.050638  | 0.139259  |
| C | 1.974764  | 0.141012  | -0.018915 |
| O | 2.668768  | -0.713420 | -0.519492 |
| N | 2.429227  | 1.320799  | 0.498171  |
| H | 3.369185  | 1.583352  | 0.247576  |
| H | 1.764153  | 2.052257  | 0.695037  |
| H | -1.937570 | -1.997520 | -0.475794 |
| C | -2.622171 | 1.345280  | -0.722413 |
| H | -3.287944 | 1.031457  | -1.532692 |
| H | -3.146818 | 2.067822  | -0.092923 |
| H | -1.758564 | 1.837471  | -1.181998 |

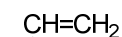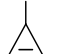

Me

$G_{\text{water}} = -233.207624$  Hartree

|   |           |           |           |
|---|-----------|-----------|-----------|
| C | -0.769336 | 1.345353  | -0.142699 |
| C | -1.175154 | 0.132687  | 0.042570  |
| C | 0.259557  | 0.405010  | 0.431766  |
| H | -0.944533 | 2.358118  | -0.472022 |
| C | 1.378935  | -0.104750 | -0.399705 |
| H | 0.507593  | 0.480388  | 1.496220  |
| C | -2.190483 | -0.940884 | -0.015496 |
| H | -3.134720 | -0.576405 | -0.426762 |
| H | -1.828548 | -1.767688 | -0.635101 |
| H | -2.372008 | -1.343254 | 0.986389  |
| H | 1.173834  | -0.179645 | -1.468931 |
| C | 2.570363  | -0.461957 | 0.075866  |
| H | 2.795960  | -0.393344 | 1.137496  |
| H | 3.359125  | -0.830921 | -0.571104 |

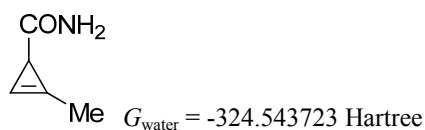

-----

|   |           |           |           |
|---|-----------|-----------|-----------|
| C | 0.975991  | 1.202168  | 0.701333  |
| C | 1.386902  | 0.244054  | -0.055696 |
| C | -0.004719 | 0.744609  | -0.338145 |
| H | 1.095188  | 1.869805  | 1.539035  |
| C | -1.140863 | -0.145445 | 0.088432  |
| O | -1.024220 | -0.978451 | 0.969515  |
| H | -0.197928 | 1.362323  | -1.221699 |
| C | 2.328514  | -0.812502 | -0.475622 |
| H | 3.251457  | -0.777297 | 0.106900  |
| H | 1.851562  | -1.786687 | -0.329116 |
| H | 2.570763  | -0.714204 | -1.538148 |
| N | -2.299646 | 0.019231  | -0.618297 |
| H | -3.115370 | -0.481838 | -0.297555 |
| H | -2.439342 | 0.823584  | -1.209265 |

-----

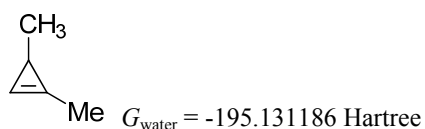

-----

|   |           |           |           |
|---|-----------|-----------|-----------|
| C | -0.685716 | 0.206784  | 0.034439  |
| C | 0.003444  | 1.281046  | -0.188019 |
| C | 0.743755  | 0.170246  | 0.498557  |
| H | 0.071276  | 2.282536  | -0.585351 |
| C | -1.930745 | -0.588044 | -0.047853 |
| H | -2.268156 | -0.869273 | 0.955190  |
| H | -2.729430 | -0.032687 | -0.545229 |
| H | -1.751504 | -1.516576 | -0.599893 |
| C | 1.793558  | -0.656829 | -0.223730 |
| H | 2.785056  | -0.196606 | -0.147229 |
| H | 1.865357  | -1.666757 | 0.195570  |
| H | 1.544061  | -0.746137 | -1.286163 |
| H | 0.937560  | 0.266279  | 1.572748  |

-----

**TS1**  $G_{\text{water}} = -762.836149$  Hartree

-----

|   |           |           |           |
|---|-----------|-----------|-----------|
| C | -2.320800 | -0.950760 | -0.191911 |
| N | -1.732108 | -0.778216 | -1.432929 |
| N | -0.468603 | -0.603112 | -1.427019 |
| C | 0.162458  | -0.669554 | -0.207803 |
| N | -0.349760 | -1.511796 | 0.752186  |
| N | -1.613940 | -1.668975 | 0.758928  |
| C | -2.121523 | 0.966562  | 0.532850  |
| C | -0.756956 | 1.232346  | 0.701672  |
| H | -2.650439 | 0.680228  | 1.441309  |
| C | -3.803554 | -1.204893 | -0.203443 |
| H | -4.265638 | -0.705322 | -1.055584 |

|   |           |           |           |
|---|-----------|-----------|-----------|
| H | -3.977614 | -2.280541 | -0.294270 |
| H | -4.269381 | -0.865341 | 0.725198  |
| C | -0.169470 | 1.099307  | 2.084413  |
| H | -0.655320 | 0.303040  | 2.654313  |
| H | 0.907762  | 0.913040  | 2.054214  |
| H | -0.322741 | 2.045400  | 2.620378  |
| C | 1.624471  | -0.440024 | -0.196102 |
| C | 2.392829  | -0.822779 | 0.908946  |
| C | 2.250518  | 0.164726  | -1.291964 |
| C | 3.764299  | -0.589767 | 0.921280  |
| H | 1.905740  | -1.317015 | 1.743165  |
| C | 3.621321  | 0.395008  | -1.273873 |
| H | 1.653235  | 0.438135  | -2.155622 |
| C | 4.381489  | 0.022047  | -0.166953 |
| H | 4.352688  | -0.891579 | 1.782267  |
| H | 4.098988  | 0.863839  | -2.128656 |
| H | 5.451885  | 0.203370  | -0.155313 |
| C | -2.934729 | 1.757621  | -0.469905 |
| H | -2.562092 | 1.627388  | -1.489370 |
| H | -3.986117 | 1.465245  | -0.449800 |
| H | -2.882611 | 2.826050  | -0.227638 |
| C | -0.077184 | 2.228355  | -0.203992 |
| H | -0.314820 | 2.058457  | -1.258002 |
| H | -0.419844 | 3.239420  | 0.057317  |
| H | 1.008174  | 2.201702  | -0.081364 |

-----  
**TS2**  $G_{\text{water}} = -722.320778$  Hartree  
 -----

|   |           |           |           |
|---|-----------|-----------|-----------|
| C | 2.546162  | -0.711711 | 0.071931  |
| N | 1.960672  | -0.768964 | 1.304528  |
| N | 0.674236  | -0.723308 | 1.328436  |
| C | 0.034891  | -0.663029 | 0.128375  |
| N | 0.613984  | -1.211670 | -0.983647 |
| N | 1.893681  | -1.252107 | -1.012201 |
| C | 2.105366  | 1.336950  | -0.420822 |
| C | 0.784248  | 1.544758  | -0.438072 |
| C | 1.520072  | 2.072813  | 0.747979  |
| H | 2.952403  | 1.415552  | -1.087416 |
| H | 1.661604  | 3.152270  | 0.840635  |
| H | 1.454951  | 1.547928  | 1.702553  |
| C | 4.045656  | -0.722359 | 0.041472  |
| H | 4.439120  | 0.043979  | 0.712265  |
| H | 4.412811  | -1.696532 | 0.377240  |
| H | 4.402012  | -0.549570 | -0.975795 |
| C | -0.331096 | 1.949452  | -1.332996 |
| H | -0.382770 | 1.300501  | -2.211469 |
| H | -1.295148 | 1.936112  | -0.820002 |
| H | -0.138516 | 2.975185  | -1.670081 |
| C | -1.432674 | -0.492855 | 0.139878  |
| C | -2.196912 | -0.843092 | -0.976824 |
| C | -2.054164 | 0.067479  | 1.259754  |
| C | -3.572009 | -0.635028 | -0.969088 |
| H | -1.703364 | -1.279562 | -1.838749 |
| C | -3.428709 | 0.275101  | 1.260067  |
| H | -1.449615 | 0.335293  | 2.120442  |

|   |           |           |           |
|---|-----------|-----------|-----------|
| C | -4.190536 | -0.074816 | 0.146329  |
| H | -4.162459 | -0.912359 | -1.836817 |
| H | -3.907055 | 0.712195  | 2.131078  |
| H | -5.263754 | 0.089369  | 0.148407  |

---

**TS3**  $G_{\text{water}} = -930.268989$  Hartree

---

|   |           |           |           |
|---|-----------|-----------|-----------|
| C | -1.157638 | 1.092987  | 0.003500  |
| N | -0.727152 | 1.643495  | 1.171472  |
| N | 0.346595  | 2.352124  | 1.125959  |
| C | 0.962284  | 2.437031  | -0.092092 |
| N | 0.196206  | 2.411343  | -1.235545 |
| N | -0.873797 | 1.709944  | -1.185333 |
| C | 0.672813  | -0.444554 | -0.239224 |
| C | 1.678960  | 0.439971  | -0.267953 |
| C | 1.496890  | -0.341492 | 1.000205  |
| H | 2.495440  | 0.710442  | -0.923916 |
| H | 1.086803  | 0.198744  | 1.856756  |
| C | -2.315374 | 0.177768  | 0.060811  |
| C | -2.644268 | -0.445007 | 1.268531  |
| C | -4.108351 | -1.011407 | -1.033133 |
| C | -3.700637 | -1.346844 | 1.320241  |
| H | -2.065733 | -0.212929 | 2.156864  |
| C | -4.434270 | -1.632912 | 0.170128  |
| H | -4.678913 | -1.230766 | -1.930240 |
| H | -3.951916 | -1.828947 | 2.259971  |
| H | -5.258013 | -2.338938 | 0.212525  |
| C | 2.462118  | -1.476234 | 1.367328  |
| H | 2.709252  | -1.423173 | 2.430472  |
| H | 2.001167  | -2.449892 | 1.178242  |
| C | 0.003234  | -1.500720 | -1.040823 |
| H | -0.850763 | -1.932448 | -0.513558 |
| H | -0.333056 | -1.101462 | -2.001600 |
| H | 0.746786  | -2.285407 | -1.225440 |
| C | 3.837165  | -2.106324 | -0.568380 |
| O | 2.986878  | -2.815061 | -1.070005 |
| C | -3.051478 | -0.109460 | -1.091972 |
| H | -2.787229 | 0.380072  | -2.023363 |
| C | 2.231918  | 3.234762  | -0.144225 |
| H | 2.692514  | 3.141449  | -1.129570 |
| H | 2.011110  | 4.290319  | 0.038222  |
| H | 2.923101  | 2.889355  | 0.627424  |
| N | 3.701373  | -1.449418 | 0.610444  |
| H | 4.435381  | -0.816776 | 0.894524  |
| H | 4.826275  | -1.946955 | -1.033904 |

---

**TS4**  $G_{\text{water}} = -1005.50615$  Hartree

---

|   |           |          |           |
|---|-----------|----------|-----------|
| C | -1.770820 | 0.834387 | 0.067553  |
| N | -1.475889 | 1.421628 | 1.259592  |
| N | -0.708358 | 2.455221 | 1.229245  |
| C | -0.240878 | 2.828114 | 0.000953  |
| N | -1.017374 | 2.607712 | -1.112845 |
| N | -1.784471 | 1.582376 | -1.078185 |

|   |           |           |           |
|---|-----------|-----------|-----------|
| C | 0.443290  | 0.025141  | -0.367314 |
| C | 1.105776  | 1.189579  | -0.366623 |
| C | 1.266248  | 0.318095  | 0.840910  |
| H | 1.731688  | 1.767158  | -1.032535 |
| H | 0.762689  | 0.635135  | 1.758472  |
| C | -2.554372 | -0.417947 | 0.091375  |
| C | -2.576383 | -1.201504 | 1.249364  |
| C | -3.937145 | -2.048210 | -1.030249 |
| C | -3.275849 | -2.402818 | 1.261882  |
| H | -2.043797 | -0.858647 | 2.130766  |
| C | -3.957049 | -2.829348 | 0.123193  |
| H | -4.470799 | -2.374306 | -1.917662 |
| H | -3.289458 | -3.008188 | 2.162872  |
| H | -4.502965 | -3.767717 | 0.135640  |
| C | 2.548217  | -0.438243 | 1.112290  |
| H | 3.234926  | 0.156035  | 1.724224  |
| H | 2.353581  | -1.374676 | 1.645705  |
| C | 0.109227  | -1.131046 | -1.239520 |
| H | -0.519012 | -1.863972 | -0.728248 |
| H | -0.397861 | -0.798872 | -2.149593 |
| H | 1.052303  | -1.615861 | -1.516522 |
| O | 3.164908  | -0.725552 | -0.144846 |
| C | 4.327936  | -1.414061 | -0.056048 |
| O | 4.818732  | -1.789723 | 0.982043  |
| N | 4.866168  | -1.586782 | -1.295911 |
| H | 5.631180  | -2.238448 | -1.368169 |
| H | 4.299125  | -1.414875 | -2.111096 |
| C | -3.237235 | -0.846842 | -1.050156 |
| H | -3.215994 | -0.229352 | -1.941752 |
| C | 0.685669  | 4.006794  | -0.034691 |
| H | 1.097089  | 4.131201  | -1.037955 |
| H | 0.134869  | 4.913980  | 0.230166  |
| H | 1.492994  | 3.869981  | 0.687306  |

-----  
**TS5**  $G_{\text{water}} = -799.674464$  Hartree  
 -----

|   |           |           |           |
|---|-----------|-----------|-----------|
| C | -2.005089 | -1.656075 | -0.260938 |
| N | -1.533624 | -1.179125 | -1.452447 |
| N | -0.302189 | -0.805242 | -1.470773 |
| C | 0.409728  | -0.962036 | -0.320451 |
| N | 0.077886  | -1.958141 | 0.557250  |
| N | -1.148591 | -2.326749 | 0.582087  |
| C | -2.011337 | 0.159244  | 0.873283  |
| C | -0.785837 | 0.690507  | 0.928253  |
| C | -1.755303 | 1.361124  | -0.001660 |
| H | -2.780564 | -0.186946 | 1.550695  |
| H | -1.658818 | 1.174779  | -1.074511 |
| C | -3.450846 | -2.052654 | -0.222037 |
| H | -4.074833 | -1.231195 | -0.579617 |
| H | -3.611773 | -2.917900 | -0.871603 |
| H | -3.736056 | -2.324467 | 0.795987  |
| C | 0.283671  | 1.091342  | 1.880829  |
| H | 0.590643  | 0.244171  | 2.500042  |
| H | 1.158453  | 1.495736  | 1.366846  |
| H | -0.117765 | 1.872812  | 2.536996  |

|   |           |           |           |
|---|-----------|-----------|-----------|
| C | 1.788922  | -0.433876 | -0.286773 |
| C | 2.709157  | -0.917606 | 0.647495  |
| C | 2.159762  | 0.591295  | -1.161666 |
| C | 3.990024  | -0.379009 | 0.702283  |
| H | 2.409850  | -1.715387 | 1.319003  |
| C | 3.440893  | 1.127500  | -1.099686 |
| H | 1.435277  | 0.959869  | -1.880990 |
| C | 4.358257  | 0.644745  | -0.167459 |
| H | 4.703240  | -0.760784 | 1.426213  |
| H | 3.724314  | 1.925744  | -1.778673 |
| H | 5.357524  | 1.066598  | -0.119073 |
| C | -2.314528 | 2.691312  | 0.344381  |
| H | -2.447735 | 2.899088  | 1.406898  |
| C | -2.653010 | 3.608992  | -0.558882 |
| H | -2.531189 | 3.422385  | -1.622880 |
| H | -3.061727 | 4.571472  | -0.269987 |

-----  
**TS6**  $G_{\text{water}} = -891.008115$  Hartree

|   |           |           |           |
|---|-----------|-----------|-----------|
| C | -0.695002 | -1.094885 | -0.258881 |
| N | -0.026659 | -1.152963 | -1.444152 |
| N | 1.148975  | -1.677185 | -1.428251 |
| C | 1.613606  | -2.087931 | -0.210831 |
| N | 0.721292  | -2.552344 | 0.727920  |
| N | -0.449039 | -2.033147 | 0.707429  |
| C | 0.745740  | 0.499695  | 0.777821  |
| C | 1.898906  | -0.163370 | 0.708610  |
| C | 1.712411  | 0.958288  | -0.270714 |
| H | 2.692813  | -0.499712 | 1.359815  |
| H | 1.531273  | 0.707438  | -1.318574 |
| C | -1.988464 | -0.382301 | -0.234199 |
| C | -2.909687 | -0.611216 | 0.791530  |
| C | -2.268249 | 0.567775  | -1.220822 |
| C | -4.101348 | 0.105405  | 0.824925  |
| H | -2.682923 | -1.351666 | 1.551484  |
| C | -3.459884 | 1.281769  | -1.180745 |
| H | -1.544105 | 0.736726  | -2.011162 |
| C | -4.378389 | 1.053356  | -0.157657 |
| H | -4.816367 | -0.076889 | 1.621176  |
| H | -3.671555 | 2.020076  | -1.947935 |
| H | -5.307519 | 1.614045  | -0.125979 |
| C | -0.194207 | 1.137355  | 1.734061  |
| H | -1.046920 | 1.595298  | 1.228603  |
| H | -0.556279 | 0.409205  | 2.464571  |
| H | 0.371924  | 1.918252  | 2.254041  |
| C | 2.439072  | 2.244591  | 0.013210  |
| O | 2.718890  | 2.583274  | 1.151206  |
| C | 3.000133  | -2.657644 | -0.178845 |
| H | 3.299325  | -2.856562 | 0.851784  |
| H | 3.022253  | -3.598328 | -0.736523 |
| H | 3.702531  | -1.963812 | -0.645169 |
| N | 2.742711  | 2.993294  | -1.079674 |
| H | 3.252871  | 3.853854  | -0.946500 |
| H | 2.552771  | 2.676971  | -2.016976 |

TS7  $G_{\text{water}} = -761.601449$  Hartree

-----  
C -0.170511 -0.866579 -0.231187  
N 0.489282 -0.785399 -1.418536  
N 1.763011 -0.973149 -1.394571  
C 2.320291 -1.194889 -0.167483  
N 1.587744 -1.839191 0.801339  
N 0.319773 -1.655801 0.772184  
C 0.794471 1.123568 0.716399  
C 2.086206 0.773933 0.683115  
C 1.627366 1.775810 -0.338389  
H 2.907472 0.636936 1.373920  
H 1.532759 1.406590 -1.362826  
C -1.609878 -0.534692 -0.219804  
C -2.434746 -0.986990 0.813629  
C -2.138859 0.280120 -1.225089  
C -3.777763 -0.626357 0.837801  
H -2.013759 -1.621093 1.586724  
C -3.481551 0.639040 -1.193852  
H -1.487458 0.624494 -2.022144  
C -4.303645 0.187852 -0.162591  
H -4.416017 -0.982596 1.640507  
H -3.887834 1.273899 -1.975209  
H -5.351624 0.470881 -0.139356  
C 1.991998 3.244308 -0.233858  
H 2.943030 3.444334 -0.737562  
H 1.227320 3.871785 -0.702904  
H 2.091097 3.553927 0.811804  
C -0.296498 1.487850 1.658894  
H -1.243164 1.666958 1.144042  
H -0.440125 0.707237 2.410899  
H -0.007895 2.412788 2.173021  
C 3.808949 -1.372483 -0.129130  
H 4.080779 -2.300626 -0.640354  
H 4.299407 -0.541302 -0.639473  
H 4.152348 -1.432382 0.905259  
-----

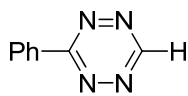

$G_{\text{water}} = -527.213293$  Hartree

-----  
C 0.795954 -0.000001 -0.000312  
C 3.344786 0.000000 0.000332  
N 2.735472 -1.186514 0.000292  
N 1.426931 -1.186701 -0.000008  
N 2.735472 1.186514 -0.000108  
N 1.426931 1.186700 -0.000451  
C -0.681194 -0.000001 -0.000145  
C -1.381274 1.210967 0.000099  
C -1.381274 -1.210966 -0.000212  
C -2.770752 1.206739 0.000257  
H -0.828010 2.143429 0.000139  
C -2.770754 -1.206738 -0.000063  
H -0.828012 -2.143429 -0.000401  
-----

|   |           |           |           |
|---|-----------|-----------|-----------|
| C | -3.467186 | 0.000000  | 0.000177  |
| H | -3.311732 | 2.147647  | 0.000449  |
| H | -3.311730 | -2.147649 | -0.000139 |
| H | -4.552928 | 0.000003  | 0.000302  |
| H | 4.428939  | 0.000000  | 0.000779  |

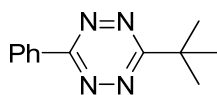

$G_{\text{water}} = -684.332497$  Hartree

|   |           |           |           |
|---|-----------|-----------|-----------|
| C | 0.710003  | 0.020206  | 0.000062  |
| C | -1.864249 | 0.037408  | -0.000053 |
| N | -1.226883 | 1.210762  | 0.000391  |
| N | 0.085538  | 1.202508  | 0.000532  |
| N | -1.234581 | -1.151974 | -0.000099 |
| N | 0.066927  | -1.163009 | -0.000107 |
| C | 2.188326  | 0.006553  | 0.000018  |
| C | 2.878443  | -1.209729 | 0.000217  |
| C | 2.899456  | 1.210908  | -0.000246 |
| C | 4.268223  | -1.217679 | 0.000145  |
| H | 2.317422  | -2.137528 | 0.000406  |
| C | 4.288922  | 1.194914  | -0.000315 |
| H | 2.353428  | 2.147758  | -0.000385 |
| C | 4.975517  | -0.017485 | -0.000120 |
| H | 4.800774  | -2.163503 | 0.000310  |
| H | 4.837839  | 2.131309  | -0.000537 |
| H | 6.061236  | -0.026840 | -0.000180 |
| C | -3.379904 | 0.004828  | -0.000105 |
| C | -3.843689 | -0.753787 | -1.254410 |
| H | -3.425984 | -1.764041 | -1.274616 |
| H | -4.936169 | -0.826338 | -1.256182 |
| H | -3.535294 | -0.229924 | -2.165345 |
| C | -3.843721 | -0.751825 | 1.255337  |
| H | -3.535524 | -0.226427 | 2.165457  |
| H | -4.936190 | -0.824555 | 1.257119  |
| H | -3.425849 | -1.761977 | 1.277251  |
| C | -3.957663 | 1.420698  | -0.001186 |
| H | -3.640204 | 1.983006  | 0.881168  |
| H | -3.639784 | 1.981799  | -0.884155 |
| H | -5.050681 | 1.359178  | -0.001392 |

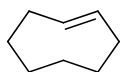

$G_{\text{water}} = -312.998444$  Hartree

|   |           |           |           |
|---|-----------|-----------|-----------|
| C | -0.413966 | -0.522065 | -1.358397 |
| H | -1.490184 | -0.336794 | -1.334889 |
| C | 0.413966  | 0.522065  | -1.358397 |
| H | 1.490184  | 0.336794  | -1.334889 |
| C | 0.034981  | -1.871510 | -0.901221 |
| H | -0.510280 | -2.704358 | -1.358222 |
| H | 1.102540  | -2.008137 | -1.112700 |
| C | -0.034981 | 1.871510  | -0.901221 |
| H | -1.102540 | 2.008137  | -1.112700 |



|   |           |           |           |
|---|-----------|-----------|-----------|
| H | 0.510280  | 2.704358  | -1.358222 |
| C | 0.183001  | 1.877834  | 0.635533  |
| H | 1.260794  | 1.924503  | 0.841500  |
| H | -0.248046 | 2.798155  | 1.048278  |
| C | -0.413966 | 0.660993  | 1.376189  |
| H | -0.560669 | 0.965017  | 2.418884  |
| H | -1.420918 | 0.465721  | 0.984525  |
| C | -0.183001 | -1.877834 | 0.635533  |
| H | 0.248046  | -2.798155 | 1.048278  |
| H | -1.260794 | -1.924503 | 0.841500  |
| C | 0.413966  | -0.660993 | 1.376189  |
| H | 0.560669  | -0.965017 | 2.418884  |
| H | 1.420918  | -0.465721 | 0.984525  |

-----  
**TS8**  $G_{\text{water}} = -890.982386$  Hartree  
 -----

|   |           |           |           |
|---|-----------|-----------|-----------|
| C | -1.193301 | 1.157782  | -0.010780 |
| N | -0.828642 | 1.775517  | 1.145385  |
| N | 0.144777  | 2.619915  | 1.077533  |
| C | 0.713370  | 2.756650  | -0.150999 |
| N | -0.038098 | 2.620096  | -1.290524 |
| N | -1.006042 | 1.784272  | -1.214283 |
| C | 0.856982  | -0.117239 | -0.278408 |
| C | 1.737657  | 0.892764  | -0.298733 |
| C | 1.645486  | 0.095016  | 0.968680  |
| H | 2.512854  | 1.271302  | -0.950622 |
| H | 1.155515  | 0.578016  | 1.817359  |
| C | -2.204588 | 0.086170  | 0.070210  |
| C | -2.401739 | -0.586889 | 1.279538  |
| C | -3.846393 | -1.335419 | -0.982432 |
| C | -3.316552 | -1.630727 | 1.352376  |
| H | -1.832159 | -0.283424 | 2.152139  |
| C | -4.040102 | -2.007700 | 0.222111  |
| H | -4.410993 | -1.623993 | -1.863528 |
| H | -3.465355 | -2.151800 | 2.292988  |
| H | -4.753268 | -2.824214 | 0.281025  |
| C | 2.746532  | -0.898329 | 1.361479  |
| H | 3.008499  | -0.758707 | 2.413344  |
| H | 2.396942  | -1.927116 | 1.235671  |
| C | 0.321860  | -1.239694 | -1.090284 |
| H | -0.469086 | -1.780781 | -0.566028 |
| H | -0.064678 | -0.874220 | -2.045581 |
| H | 1.154742  | -1.926440 | -1.282601 |
| C | 4.159585  | -1.490815 | -0.560092 |
| O | 3.392551  | -2.326766 | -0.996101 |
| C | -2.929930 | -0.292520 | -1.063003 |
| H | -2.768292 | 0.236811  | -1.996011 |
| N | 3.957065  | -0.769869 | 0.570489  |
| H | 4.624409  | -0.050512 | 0.808707  |
| H | 5.119368  | -1.251900 | -1.052359 |
| H | 1.554469  | 3.437312  | -0.213873 |

-----  
**TS9**  $G_{\text{water}} = -1048.100333$  Hartree  
 -----

|   |           |           |           |
|---|-----------|-----------|-----------|
| C | 1.177712  | -1.121575 | 0.032165  |
| N | 0.571238  | -1.425089 | 1.212138  |
| N | -0.693505 | -1.657583 | 1.176785  |
| C | -1.309493 | -1.538733 | -0.039417 |
| N | -0.593100 | -1.839162 | -1.174409 |
| N | 0.666495  | -1.607362 | -1.139229 |
| C | 0.118438  | 1.012854  | -0.250426 |
| C | -1.156565 | 0.608395  | -0.254820 |
| C | -0.662748 | 1.268207  | 0.996883  |
| H | -2.018124 | 0.681575  | -0.902281 |
| H | -0.492136 | 0.621687  | 1.861027  |
| C | 2.602761  | -0.735454 | 0.068255  |
| C | 3.156394  | -0.245595 | 1.254808  |
| C | 4.714125  | -0.392910 | -1.050176 |
| C | 4.482807  | 0.168928  | 1.283798  |
| H | 2.537332  | -0.195399 | 2.144799  |
| C | 5.264388  | 0.097637  | 0.131840  |
| H | 5.320215  | -0.451032 | -1.948993 |
| H | 4.907661  | 0.550317  | 2.207174  |
| H | 6.299523  | 0.424338  | 0.155712  |
| C | -1.099014 | 2.696189  | 1.346576  |
| H | -1.287150 | 2.774720  | 2.420055  |
| H | -0.314054 | 3.413744  | 1.090304  |
| C | 1.139986  | 1.697450  | -1.083323 |
| H | 2.100548  | 1.778748  | -0.569443 |
| H | 1.282432  | 1.169319  | -2.030028 |
| H | 0.756850  | 2.702324  | -1.297194 |
| C | -2.241418 | 3.712028  | -0.574317 |
| O | -1.214842 | 3.985324  | -1.164750 |
| C | 3.387299  | -0.807752 | -1.086155 |
| H | 2.947318  | -1.190296 | -2.001045 |
| C | -2.801741 | -1.858236 | -0.054216 |
| N | -2.298563 | 3.120082  | 0.644416  |
| H | -3.202092 | 2.862299  | 1.014500  |
| H | -3.241231 | 3.941897  | -0.984615 |
| C | -2.922970 | -3.357446 | 0.280908  |
| H | -2.493606 | -3.566050 | 1.264769  |
| H | -3.977239 | -3.654365 | 0.285556  |
| H | -2.396401 | -3.960269 | -0.466046 |
| C | -3.534038 | -1.043798 | 1.017840  |
| H | -3.517405 | 0.027013  | 0.787505  |
| H | -4.580048 | -1.363731 | 1.068165  |
| H | -3.076025 | -1.191911 | 1.999521  |
| C | -3.421362 | -1.614353 | -1.433457 |
| H | -4.467876 | -1.935879 | -1.415673 |
| H | -3.410396 | -0.556534 | -1.716726 |
| H | -2.894684 | -2.176330 | -2.207545 |

-----  
**TS10**  $G_{\text{water}} = -840.187486$  Hartree  
 -----

|   |           |           |           |
|---|-----------|-----------|-----------|
| C | -1.012127 | 1.217003  | -0.071701 |
| C | 1.047417  | 2.567439  | -0.371057 |
| C | 1.880567  | 0.575300  | -0.219291 |
| H | 2.301894  | 0.644720  | -1.224137 |
| C | 0.787513  | -0.247208 | -0.067038 |

|   |           |           |           |
|---|-----------|-----------|-----------|
| H | 0.499175  | -0.515263 | 0.950951  |
| N | 0.469568  | 2.641470  | 0.863788  |
| N | -0.589427 | 1.933004  | 1.017422  |
| N | 0.277100  | 2.409408  | -1.487025 |
| N | -0.784494 | 1.704997  | -1.329095 |
| C | 0.441437  | -1.242532 | -1.131181 |
| H | -0.624575 | -1.491756 | -1.144768 |
| H | 0.707005  | -0.834113 | -2.114236 |
| C | 2.864215  | 0.727700  | 0.908849  |
| H | 3.406566  | 1.679197  | 0.869204  |
| H | 2.327453  | 0.698150  | 1.864578  |
| C | 1.260192  | -2.525979 | -0.858926 |
| H | 1.094223  | -3.215599 | -1.694761 |
| H | 0.853951  | -3.021074 | 0.032823  |
| C | 3.870637  | -0.440944 | 0.833545  |
| H | 4.513833  | -0.391042 | 1.719825  |
| H | 4.529660  | -0.289653 | -0.031835 |
| C | 3.242632  | -1.844236 | 0.740987  |
| H | 3.993536  | -2.555743 | 1.100807  |
| H | 2.411428  | -1.915586 | 1.455529  |
| C | 2.773122  | -2.313278 | -0.667130 |
| H | 3.263218  | -3.268048 | -0.885587 |
| H | 3.139397  | -1.617001 | -1.433589 |
| C | -2.143947 | 0.285067  | 0.121294  |
| C | -2.909736 | -0.135884 | -0.970243 |
| C | -2.436058 | -0.196976 | 1.400312  |
| C | -3.958825 | -1.028911 | -0.779003 |
| H | -2.677083 | 0.249475  | -1.957508 |
| C | -3.484752 | -1.090684 | 1.584596  |
| H | -1.843294 | 0.144976  | 2.243113  |
| C | -4.248079 | -1.508801 | 0.496289  |
| H | -4.553973 | -1.347923 | -1.629055 |
| H | -3.708217 | -1.460641 | 2.580480  |
| H | -5.066011 | -2.207653 | 0.642263  |
| H | 1.977325  | 3.109964  | -0.501540 |

-----  
**TS11**  $G_{\text{water}} = -879.472359$  Hartree

|   |           |           |           |
|---|-----------|-----------|-----------|
| C | 0.944301  | -1.151631 | -0.016487 |
| C | -1.287102 | -2.265699 | -0.235917 |
| C | -1.782092 | -0.143807 | -0.105920 |
| H | -2.252106 | -0.196518 | -1.089916 |
| C | -0.568227 | 0.509800  | -0.042213 |
| H | -0.213515 | 0.809895  | 0.945544  |
| N | -0.670776 | -2.371051 | 0.985434  |
| N | 0.466230  | -1.792312 | 1.098238  |
| N | -0.511144 | -2.216933 | -1.369759 |
| N | 0.627284  | -1.644617 | -1.256858 |
| C | -0.131536 | 1.379511  | -1.183558 |
| H | 0.957454  | 1.469618  | -1.249382 |
| H | -0.492116 | 0.950419  | -2.126644 |
| C | -2.725815 | -0.059240 | 1.062191  |
| H | -3.411093 | -0.911008 | 1.116533  |
| H | -2.146704 | -0.043087 | 1.993136  |
| C | -0.741975 | 2.784785  | -0.983127 |

|   |           |           |           |
|---|-----------|-----------|-----------|
| H | -0.506905 | 3.381451  | -1.872200 |
| H | -0.234243 | 3.275423  | -0.142342 |
| C | -3.552626 | 1.238371  | 0.933357  |
| H | -4.156450 | 1.342565  | 1.842577  |
| H | -4.265203 | 1.124828  | 0.105229  |
| C | -2.740042 | 2.527494  | 0.714983  |
| H | -3.372119 | 3.362339  | 1.035849  |
| H | -1.881042 | 2.534724  | 1.399326  |
| C | -2.261171 | 2.818240  | -0.736045 |
| H | -2.610405 | 3.818669  | -1.013145 |
| H | -2.757018 | 2.133447  | -1.437153 |
| C | 2.216289  | -0.406141 | 0.128625  |
| C | 3.004607  | -0.120579 | -0.990266 |
| C | 2.622084  | 0.034717  | 1.391515  |
| C | 4.186250  | 0.598553  | -0.843138 |
| H | 2.683594  | -0.473465 | -1.964726 |
| C | 3.804099  | 0.752902  | 1.532302  |
| H | 2.011465  | -0.204943 | 2.256378  |
| C | 4.588207  | 1.037531  | 0.416227  |
| H | 4.795724  | 0.815400  | -1.715019 |
| H | 4.115761  | 1.089669  | 2.516182  |
| H | 5.511236  | 1.598306  | 0.528015  |
| C | -2.624774 | -2.930997 | -0.383966 |
| H | -2.487887 | -3.908545 | -0.854482 |
| H | -3.081058 | -3.074257 | 0.596134  |
| H | -3.291379 | -2.343400 | -1.020659 |

-----  
**TS12**  $G_{\text{water}} = -997.297872$  Hartree  
 -----

|   |           |           |           |
|---|-----------|-----------|-----------|
| C | -1.610947 | -1.255314 | -0.042317 |
| C | 0.900778  | -1.130544 | 0.063174  |
| C | 0.287539  | 0.938639  | -0.046628 |
| H | 0.794974  | 1.133345  | 0.899747  |
| C | -1.098144 | 0.912277  | -0.015921 |
| H | -1.600322 | 1.039541  | -0.974433 |
| N | 0.355232  | -1.499269 | -1.147237 |
| N | -0.916881 | -1.548658 | -1.200347 |
| N | 0.250098  | -1.487861 | 1.220478  |
| N | -1.025952 | -1.555566 | 1.162712  |
| C | -1.802388 | 1.501261  | 1.175987  |
| H | -2.805583 | 1.095784  | 1.316857  |
| H | -1.227773 | 1.278444  | 2.083555  |
| C | 0.986120  | 1.458851  | -1.272725 |
| H | 1.981439  | 1.022427  | -1.402503 |
| H | 0.392611  | 1.206325  | -2.159916 |
| C | -1.927053 | 3.028719  | 0.986134  |
| H | -2.351091 | 3.443447  | 1.908250  |
| H | -2.664591 | 3.225979  | 0.196004  |
| C | 1.123513  | 2.990652  | -1.154668 |
| H | 1.540437  | 3.363144  | -2.097625 |
| H | 1.866135  | 3.221394  | -0.379315 |
| C | -0.177315 | 3.749090  | -0.841651 |
| H | -0.035973 | 4.783999  | -1.171446 |
| H | -0.987500 | 3.352812  | -1.469083 |
| C | -0.626290 | 3.775491  | 0.646090  |

|   |           |           |           |
|---|-----------|-----------|-----------|
| H | -0.772606 | 4.821231  | 0.937135  |
| H | 0.184070  | 3.406533  | 1.288961  |
| C | 2.379274  | -1.030797 | 0.147392  |
| C | 2.979385  | -0.711184 | 1.368123  |
| C | 3.176482  | -1.242098 | -0.980847 |
| C | 4.362196  | -0.602738 | 1.458891  |
| H | 2.352535  | -0.565207 | 2.242653  |
| C | 4.560374  | -1.133845 | -0.884045 |
| H | 2.701164  | -1.498488 | -1.921922 |
| C | 5.155983  | -0.813135 | 0.333175  |
| H | 4.822152  | -0.357101 | 2.411168  |
| H | 5.174860  | -1.305352 | -1.762594 |
| H | 6.236087  | -0.729052 | 0.405596  |
| C | -3.127089 | -1.464647 | -0.141822 |
| C | -3.790396 | -1.482786 | 1.240966  |
| H | -4.874280 | -1.572241 | 1.111088  |
| H | -3.438242 | -2.334197 | 1.827615  |
| H | -3.590417 | -0.584003 | 1.826621  |
| C | -3.780842 | -0.418709 | -1.052910 |
| H | -3.253626 | -0.357448 | -2.011026 |
| H | -4.816707 | -0.709848 | -1.255594 |
| H | -3.800734 | 0.576553  | -0.596763 |
| C | -3.345661 | -2.855439 | -0.774731 |
| H | -2.830670 | -3.627484 | -0.193396 |
| H | -4.416349 | -3.086654 | -0.779236 |
| H | -2.970603 | -2.886854 | -1.799641 |

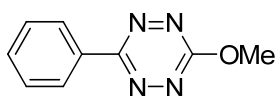

$G_{\text{water}} = -641.707742$  Hartree

|   |           |           |           |
|---|-----------|-----------|-----------|
| C | -0.046608 | 0.097476  | -0.000015 |
| C | 2.499247  | 0.288006  | 0.000521  |
| N | 1.978456  | -0.935789 | 0.000420  |
| N | 0.667509  | -1.028509 | 0.000217  |
| N | 1.797924  | 1.437922  | 0.000050  |
| N | 0.505909  | 1.330904  | -0.000120 |
| O | 3.814594  | 0.447260  | 0.000021  |
| C | 4.606811  | -0.740448 | -0.000093 |
| H | 4.399766  | -1.340293 | -0.889417 |
| H | 5.638439  | -0.393529 | -0.000504 |
| H | 4.400372  | -1.340019 | 0.889554  |
| C | -1.522131 | 0.000243  | -0.000086 |
| C | -2.303451 | 1.160149  | -0.000415 |
| C | -2.140965 | -1.253793 | 0.000182  |
| C | -3.690025 | 1.062286  | -0.000477 |
| H | -1.815904 | 2.128761  | -0.000622 |
| C | -3.527405 | -1.343629 | 0.000113  |
| H | -1.527605 | -2.147923 | 0.000430  |
| C | -4.305045 | -0.187308 | -0.000215 |
| H | -4.291970 | 1.965496  | -0.000731 |
| H | -4.002705 | -2.319593 | 0.000324  |
| H | -5.388291 | -0.260561 | -0.000263 |

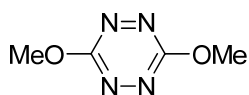

$G_{\text{water}} = -525.252980$  Hartree

|   |           |           |           |
|---|-----------|-----------|-----------|
| C | -1.226238 | -0.316848 | -0.000071 |
| C | 1.226239  | 0.316851  | 0.000098  |
| N | 0.923084  | -0.985302 | 0.000549  |
| N | -0.341297 | -1.318279 | 0.000390  |
| N | 0.341299  | 1.318281  | 0.000359  |
| N | -0.923084 | 0.985303  | 0.000227  |
| O | 2.501393  | 0.694018  | -0.000051 |
| O | -2.501392 | -0.694020 | -0.000305 |
| C | -3.478384 | 0.344442  | -0.000300 |
| H | -3.377296 | 0.972036  | -0.889325 |
| H | -4.438373 | -0.169142 | -0.000949 |
| H | -3.378137 | 0.971362  | 0.889291  |
| C | 3.478382  | -0.344443 | -0.000548 |
| H | 3.376445  | -0.972588 | -0.889078 |
| H | 4.438372  | 0.169135  | -0.002378 |
| H | 3.378982  | -0.970815 | 0.889534  |

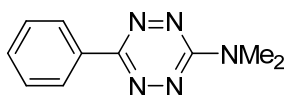

$G_{\text{water}} = -661.106338$  Hartree

|   |           |           |           |
|---|-----------|-----------|-----------|
| C | -0.403972 | -0.000350 | -0.000005 |
| C | 2.166323  | -0.000250 | 0.000049  |
| N | 1.534110  | -1.197238 | 0.000111  |
| N | 0.233121  | -1.181317 | 0.000043  |
| N | 1.533768  | 1.197142  | 0.000127  |
| N | 0.233259  | 1.181155  | 0.000104  |
| C | 4.219351  | -1.272088 | 0.000071  |
| H | 3.962579  | -1.864161 | -0.883357 |
| H | 5.290367  | -1.070395 | -0.000930 |
| H | 3.964050  | -1.863294 | 0.884536  |
| C | -1.883254 | -0.000097 | -0.000099 |
| C | -2.586534 | 1.208676  | -0.000321 |
| C | -2.586774 | -1.208722 | 0.000044  |
| C | -3.976515 | 1.205033  | -0.000394 |
| H | -2.034024 | 2.141724  | -0.000424 |
| C | -3.976777 | -1.204824 | -0.000033 |
| H | -2.034429 | -2.141869 | 0.000214  |
| C | -4.675573 | 0.000174  | -0.000250 |
| H | -4.515998 | 2.147188  | -0.000566 |
| H | -4.516420 | -2.146882 | 0.000085  |
| H | -5.761325 | 0.000317  | -0.000306 |
| N | 3.513885  | 0.000097  | -0.000068 |
| C | 4.219066  | 1.272384  | 0.000422  |
| H | 3.963098  | 1.864306  | -0.883352 |
| H | 3.962950  | 1.863754  | 0.884526  |
| H | 5.290102  | 1.070818  | 0.000453  |

**TS2a**  $G_{\text{water}} = -797.524453$  Hartree

-----

|   |           |           |           |
|---|-----------|-----------|-----------|
| C | -0.205200 | -0.504610 | -0.307717 |
| N | 0.354771  | -0.269896 | -1.537768 |
| N | 1.632365  | -0.258120 | -1.612351 |
| C | 2.288666  | -0.437625 | -0.423176 |
| N | 1.750583  | -1.254181 | 0.536945  |
| N | 0.470101  | -1.269255 | 0.601755  |
| C | 0.426061  | 1.471241  | 0.699011  |
| C | 1.752372  | 1.403877  | 0.512007  |
| C | 0.990714  | 2.335242  | -0.380667 |
| H | 2.661044  | 1.428714  | 1.096489  |
| H | 0.851600  | 2.056402  | -1.425708 |
| C | -0.595242 | 1.570689  | 1.776405  |
| H | -0.533745 | 0.715254  | 2.454814  |
| H | -0.391795 | 2.482937  | 2.349635  |
| H | -1.608569 | 1.637765  | 1.375379  |
| C | 4.368374  | -0.854370 | 0.581920  |
| H | 4.242575  | -1.935917 | 0.668635  |
| H | 5.405923  | -0.603239 | 0.366050  |
| H | 4.055872  | -0.390980 | 1.524368  |
| O | 3.621215  | -0.343122 | -0.515429 |
| H | 1.048450  | 3.412727  | -0.210809 |
| C | -1.681217 | -0.454353 | -0.220248 |
| C | -2.357870 | -1.135632 | 0.795072  |
| C | -2.398966 | 0.322488  | -1.133725 |
| C | -3.742239 | -1.042059 | 0.890143  |
| H | -1.790169 | -1.735874 | 1.498171  |
| C | -3.782424 | 0.414847  | -1.031056 |
| H | -1.862816 | 0.846481  | -1.918571 |
| C | -4.457186 | -0.266375 | -0.019542 |
| H | -4.264212 | -1.576899 | 1.677587  |
| H | -4.336128 | 1.019904  | -1.742316 |
| H | -5.537552 | -0.192285 | 0.059092  |

-----

**TS2b**  $G_{\text{water}} = -681.067857$  Hartree

-----

|   |           |           |           |
|---|-----------|-----------|-----------|
| C | 0.966651  | -0.793633 | -0.292842 |
| N | 0.561228  | -1.167747 | 0.951613  |
| N | -0.683008 | -1.006073 | 1.226376  |
| C | -1.431662 | -0.448762 | 0.228847  |
| N | -1.126028 | -0.710944 | -1.083532 |
| N | 0.113255  | -0.883333 | -1.356412 |
| C | 0.709869  | 1.433306  | -0.048472 |
| C | -0.595754 | 1.508536  | 0.248408  |
| C | 0.358656  | 1.729636  | 1.378165  |
| H | -1.502244 | 1.962688  | -0.125716 |
| H | 0.459901  | 0.950210  | 2.133718  |
| C | 1.701571  | 1.882690  | -1.063769 |
| H | 1.389839  | 1.584933  | -2.067749 |
| H | 1.763687  | 2.976204  | -1.020552 |
| H | 2.697279  | 1.477362  | -0.874633 |
| C | -3.613709 | -0.003290 | -0.516292 |
| H | -3.700523 | -0.888169 | -1.150959 |
| H | -4.569493 | 0.229535  | -0.048494 |

-----

|   |           |           |           |
|---|-----------|-----------|-----------|
| H | -3.282745 | 0.837746  | -1.135941 |
| C | 3.167999  | -0.911346 | 0.486993  |
| H | 3.074670  | -1.832292 | 1.066204  |
| H | 4.161290  | -0.835241 | 0.045537  |
| H | 2.976126  | -0.055133 | 1.143656  |
| O | -2.714690 | -0.235909 | 0.560446  |
| O | 2.262377  | -0.908675 | -0.612349 |
| H | 0.510866  | 2.742687  | 1.757616  |

-----

**TS2c**  $G_{\text{water}} = -816.916982$  Hartree

-----

|   |           |           |           |
|---|-----------|-----------|-----------|
| C | -0.442523 | -0.395387 | -0.275026 |
| N | 0.205650  | 0.016563  | -1.414406 |
| N | 1.483135  | 0.024723  | -1.387417 |
| C | 2.073183  | -0.352712 | -0.196910 |
| N | 1.442291  | -1.331603 | 0.559737  |
| N | 0.169453  | -1.338140 | 0.520227  |
| C | 0.036154  | 1.282635  | 1.052503  |
| C | 1.380541  | 1.297323  | 0.972445  |
| C | 0.646474  | 2.357085  | 0.211986  |
| H | 2.236753  | 1.243775  | 1.628277  |
| H | 0.590479  | 2.280307  | -0.874999 |
| C | -1.036178 | 1.195879  | 2.084337  |
| H | -0.993075 | 0.237823  | 2.610022  |
| H | -0.871917 | 1.998134  | 2.812887  |
| H | -2.031247 | 1.320926  | 1.652822  |
| N | 3.442007  | -0.275680 | -0.110617 |
| H | 0.640570  | 3.382708  | 0.588034  |
| C | -1.924456 | -0.390771 | -0.317045 |
| C | -2.664456 | -1.256545 | 0.492131  |
| C | -2.586561 | 0.526330  | -1.137181 |
| C | -4.054393 | -1.204870 | 0.475928  |
| H | -2.141173 | -1.965664 | 1.124794  |
| C | -3.976191 | 0.574693  | -1.147829 |
| H | -2.001099 | 1.193877  | -1.761540 |
| C | -4.713792 | -0.289599 | -0.340861 |
| H | -4.625133 | -1.882800 | 1.103276  |
| H | -4.484980 | 1.290029  | -1.786827 |
| H | -5.798731 | -0.249179 | -0.349284 |
| C | 4.151485  | -1.283043 | 0.657689  |
| H | 5.170280  | -0.927026 | 0.828364  |
| H | 3.662187  | -1.435499 | 1.620168  |
| H | 4.193146  | -2.252136 | 0.140339  |
| C | 4.150957  | 0.356163  | -1.207437 |
| H | 3.651848  | 1.288256  | -1.479101 |
| H | 5.167356  | 0.580894  | -0.875175 |
| H | 4.195530  | -0.278542 | -2.103102 |

-----



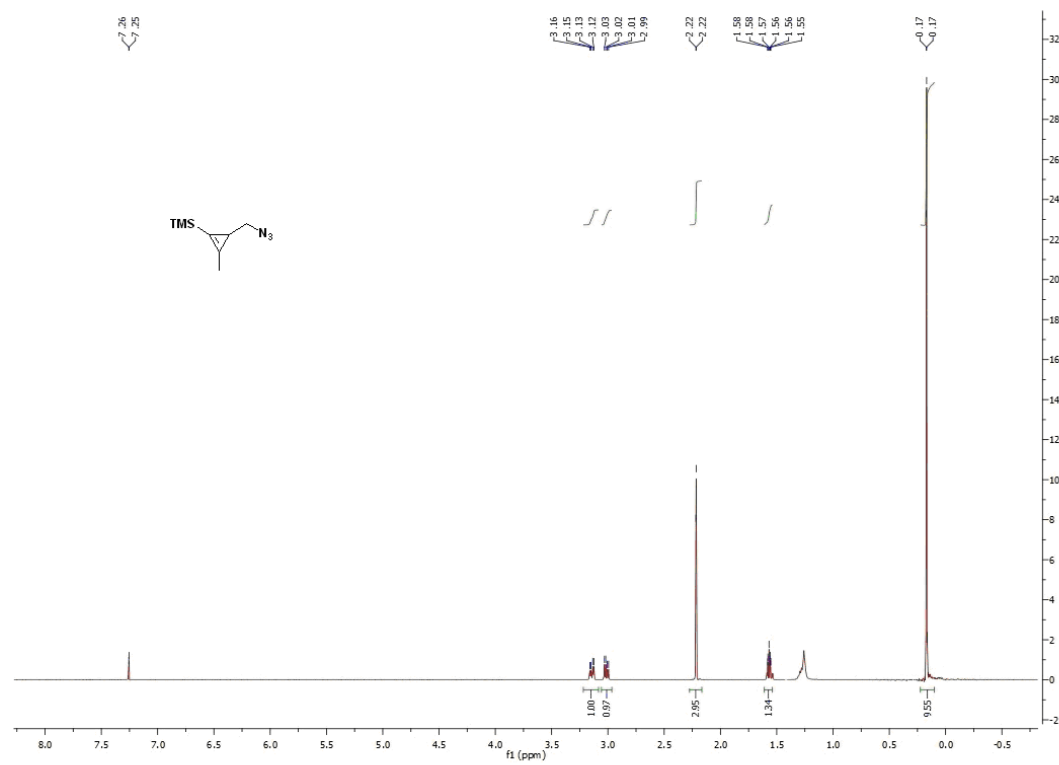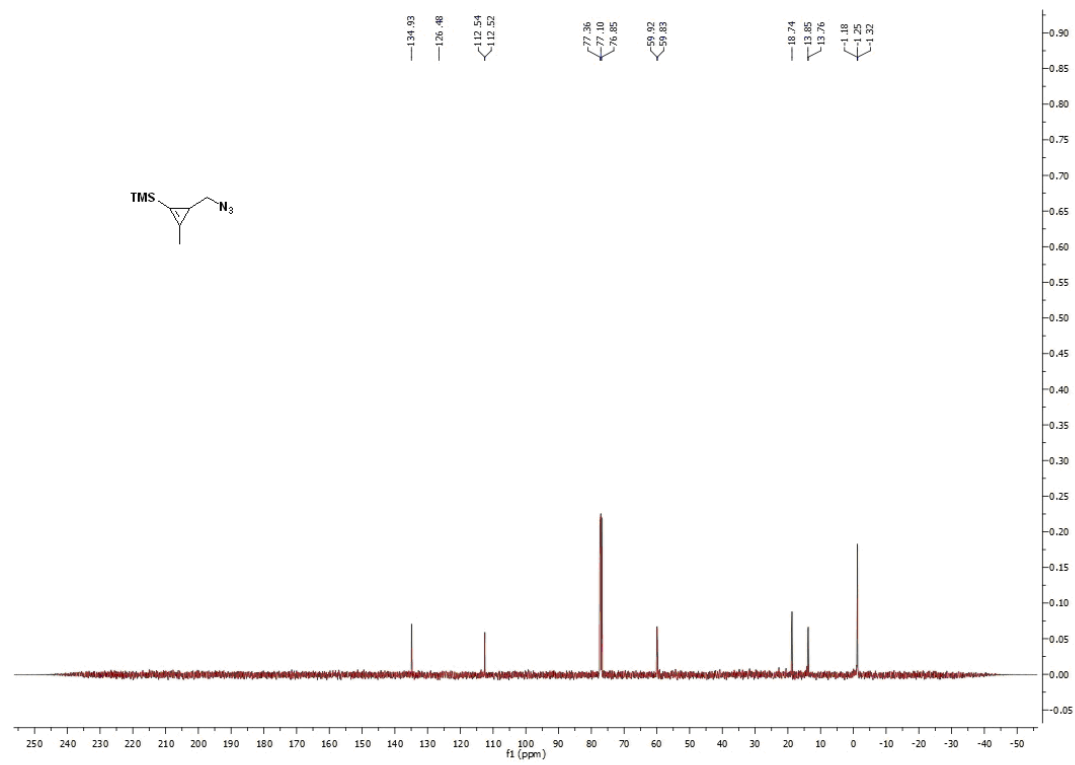

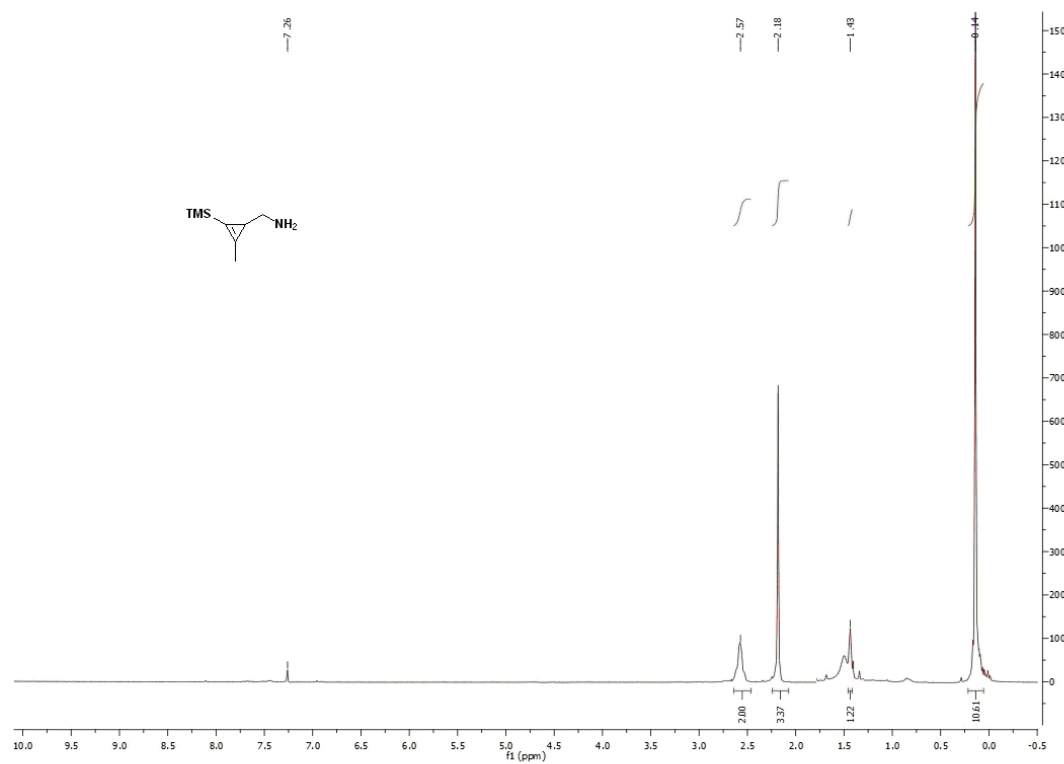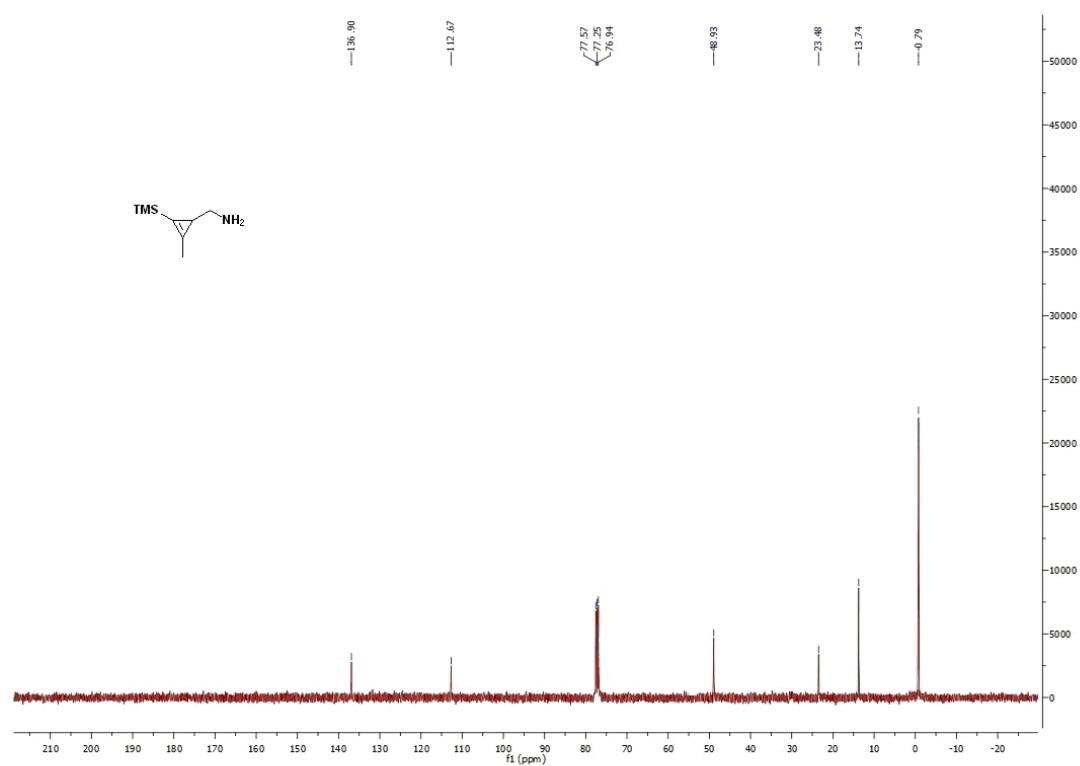

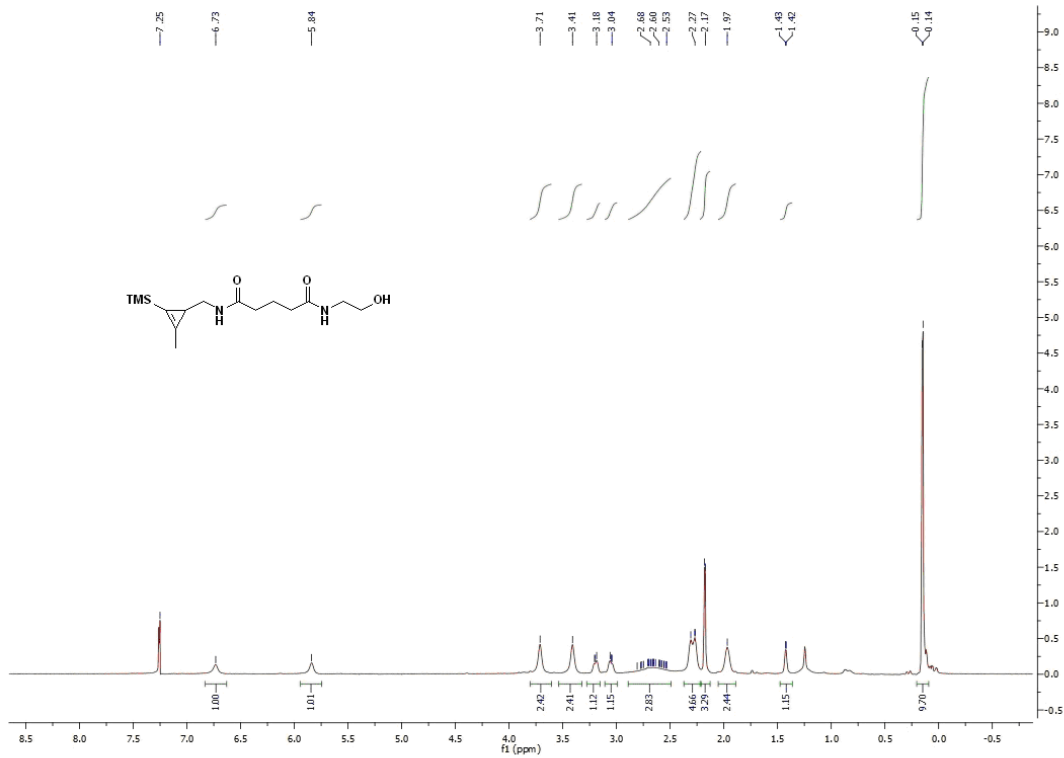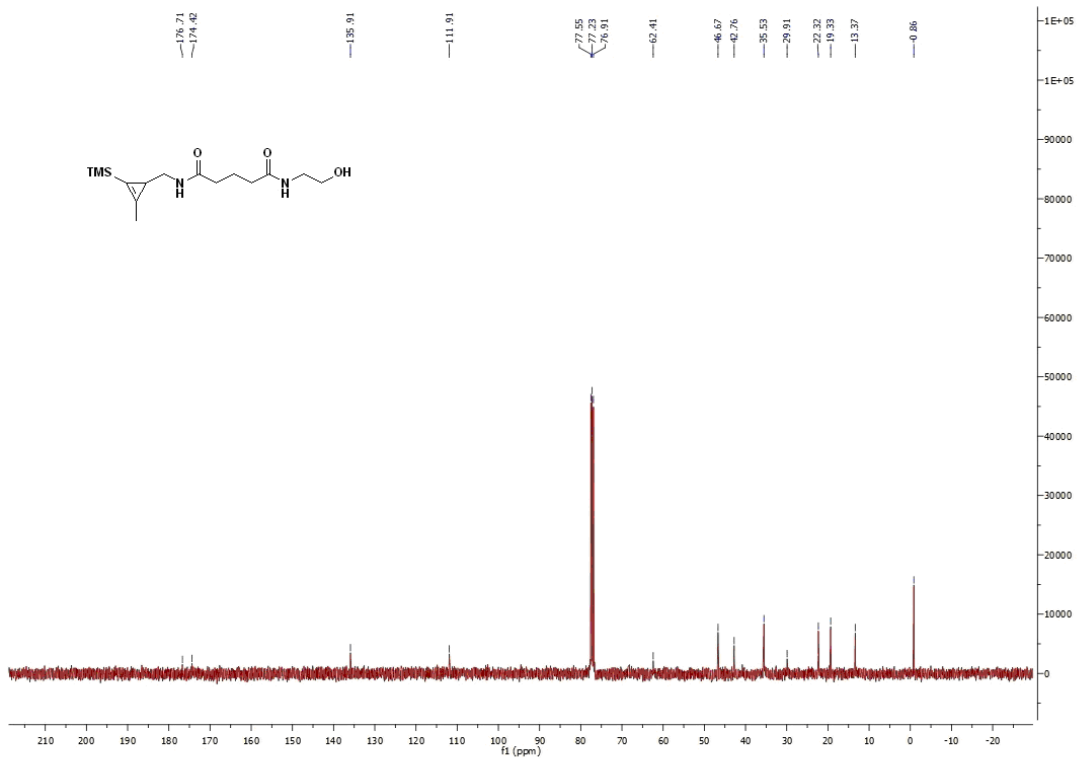

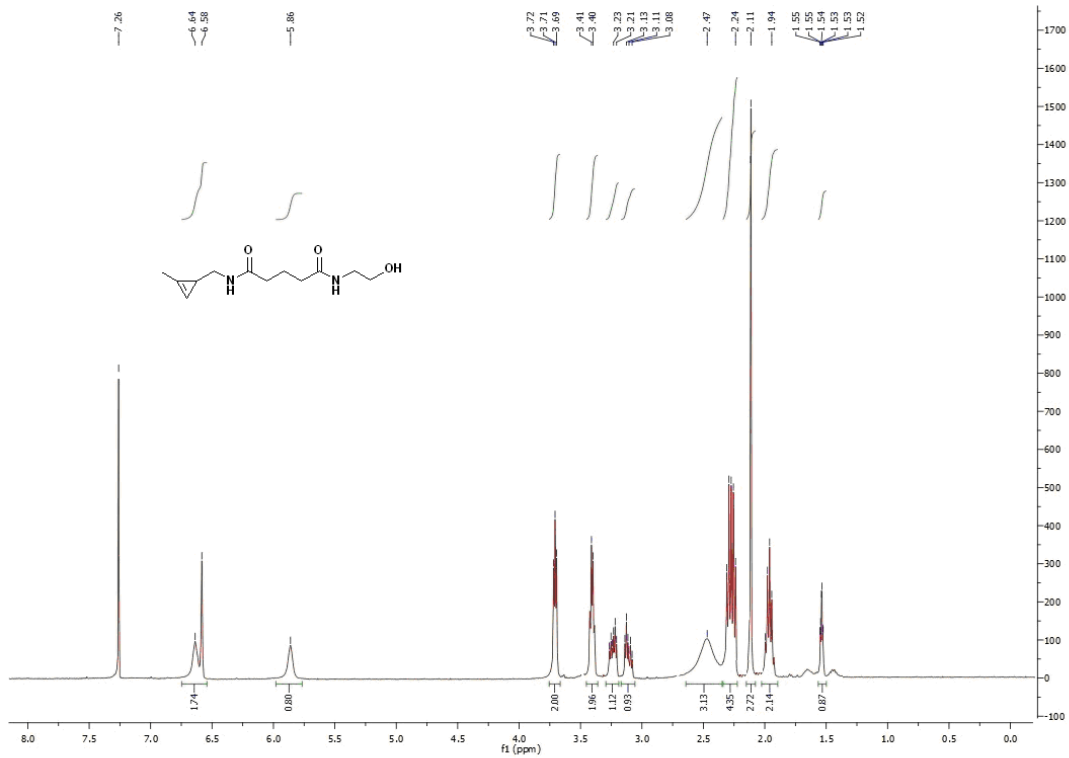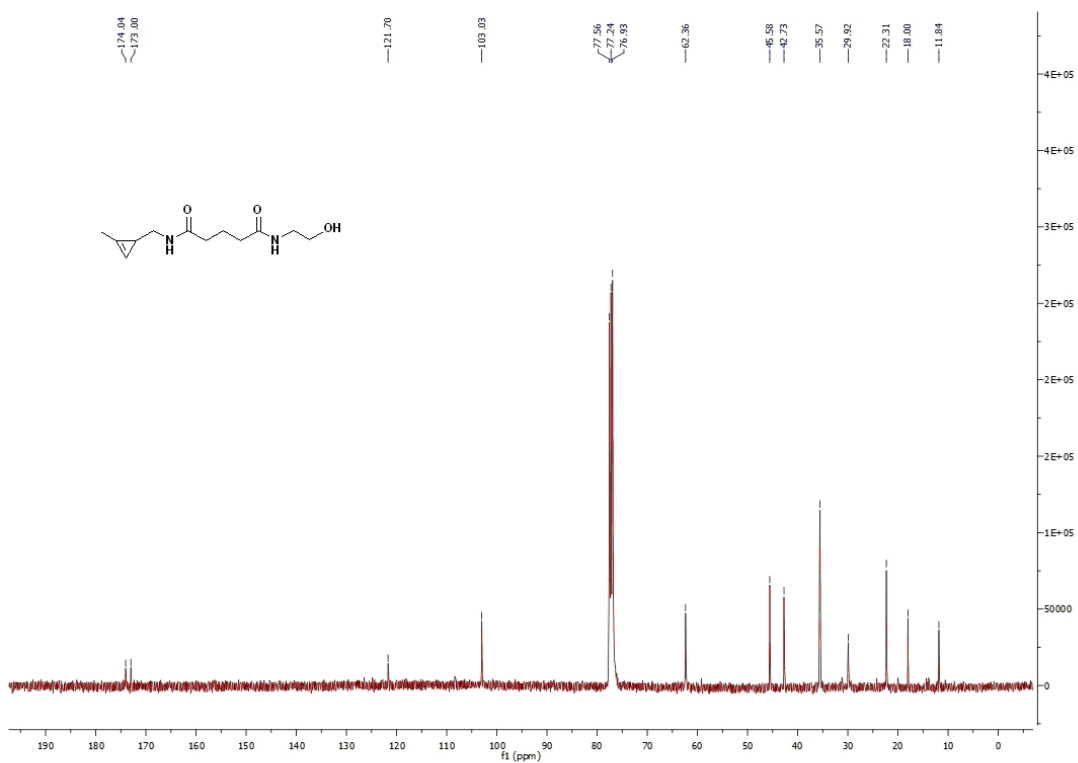

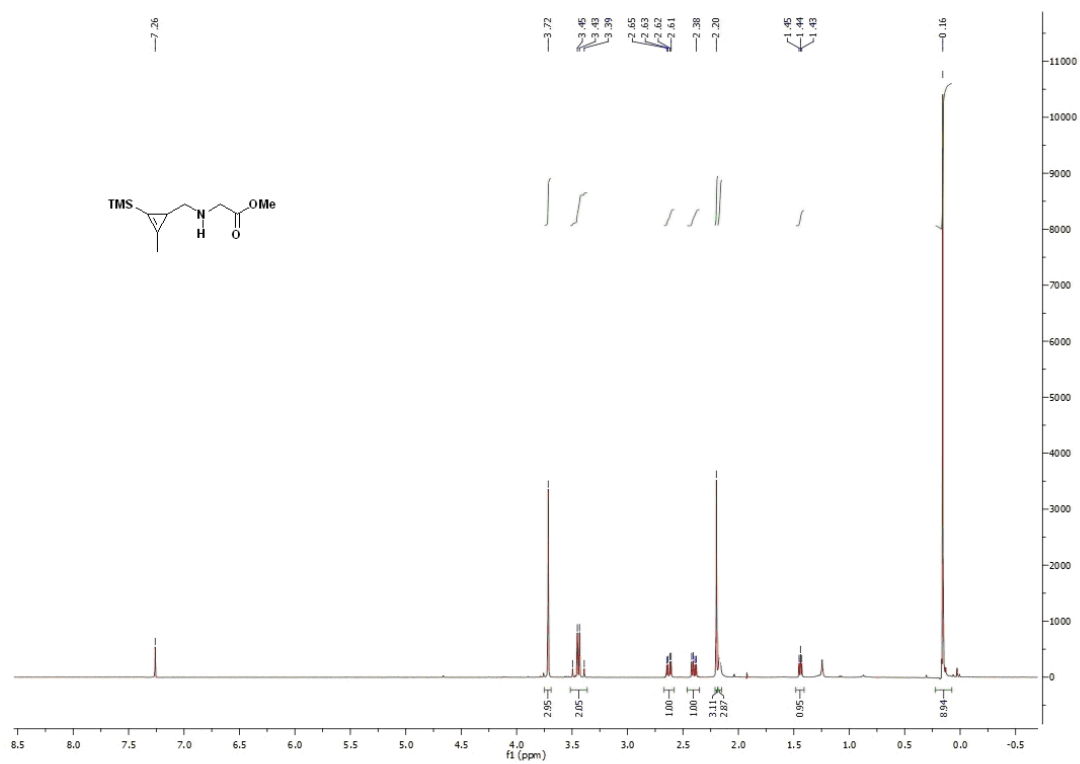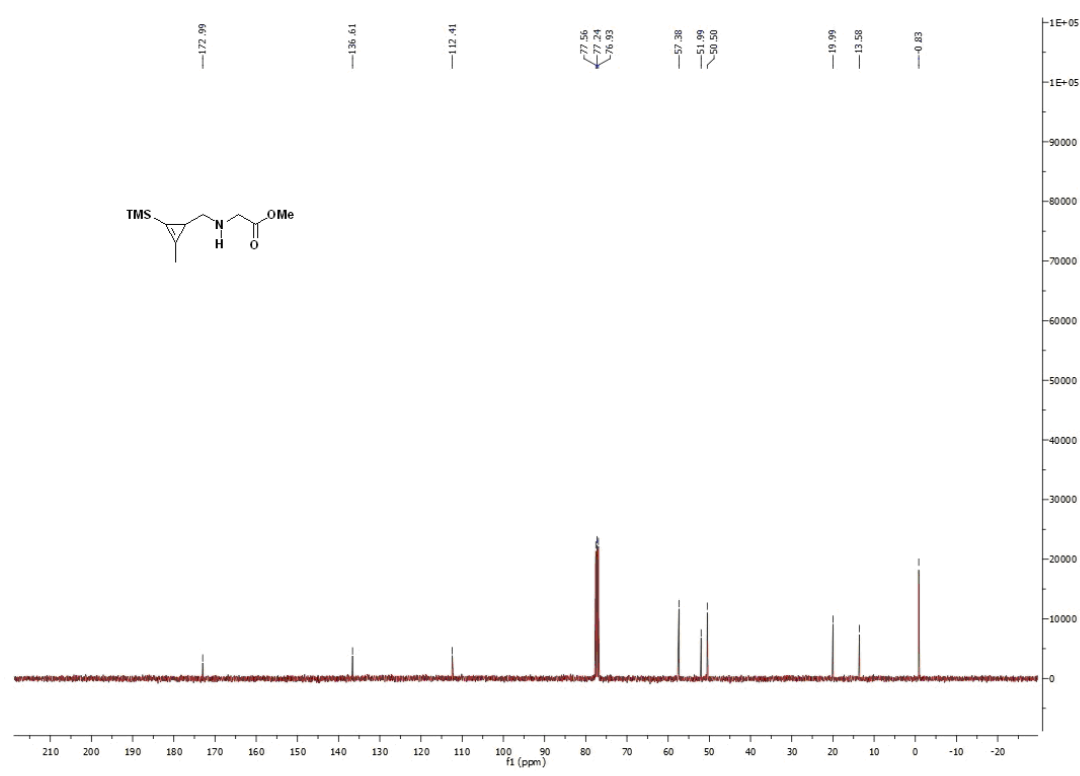

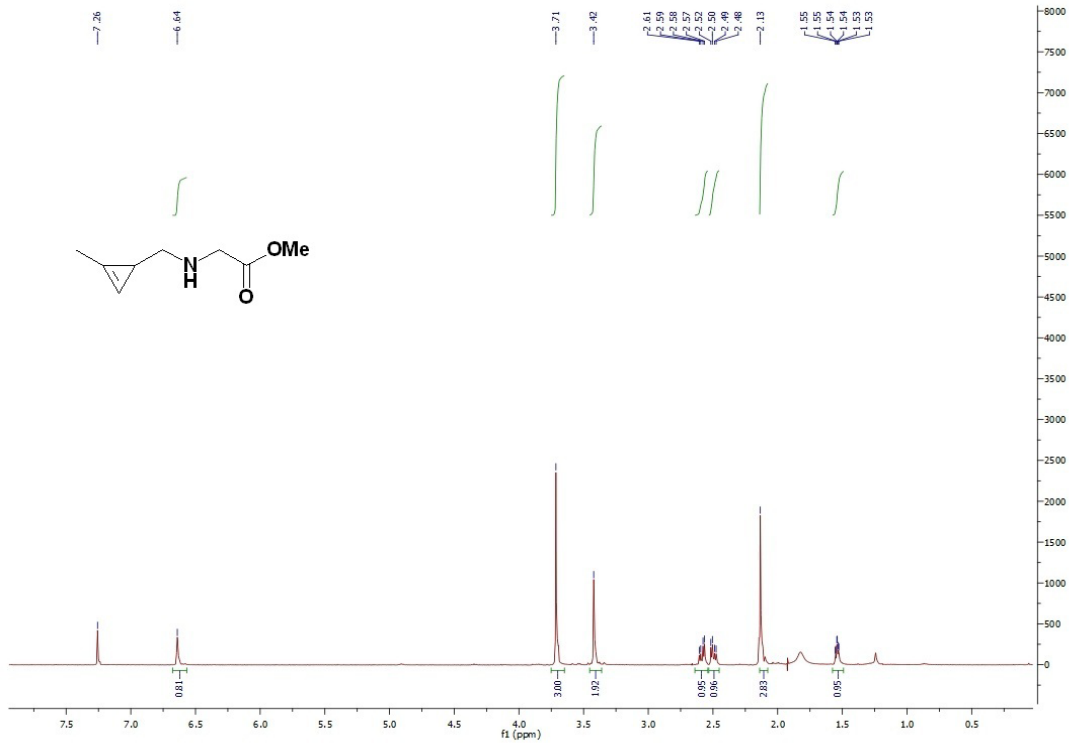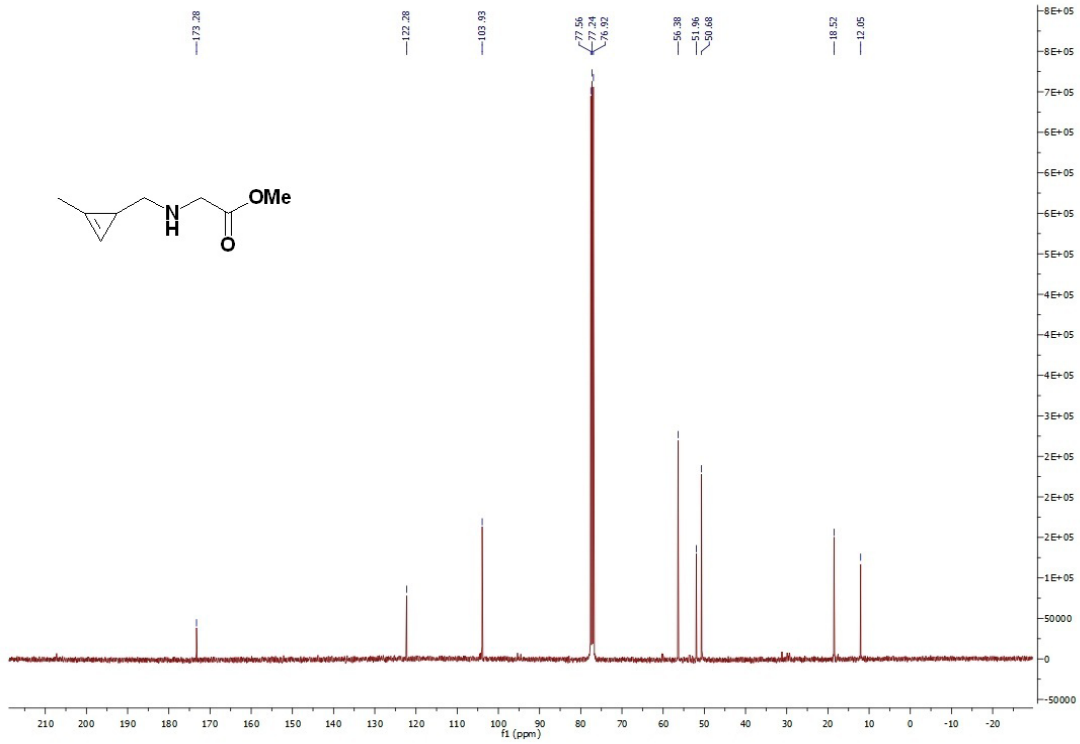

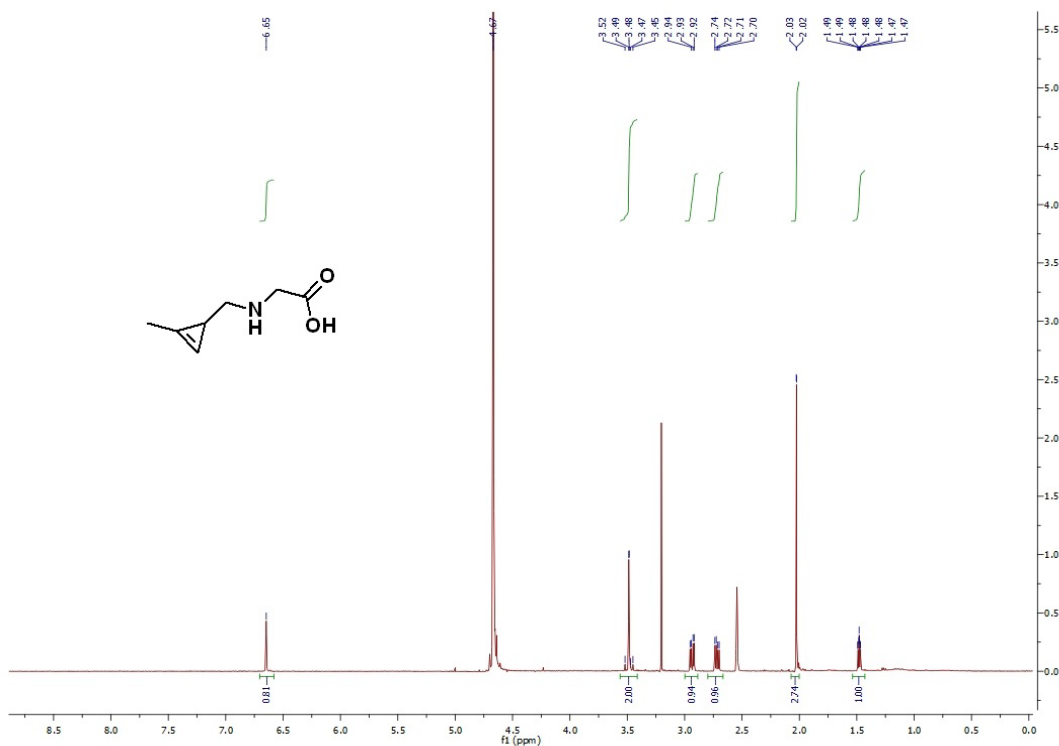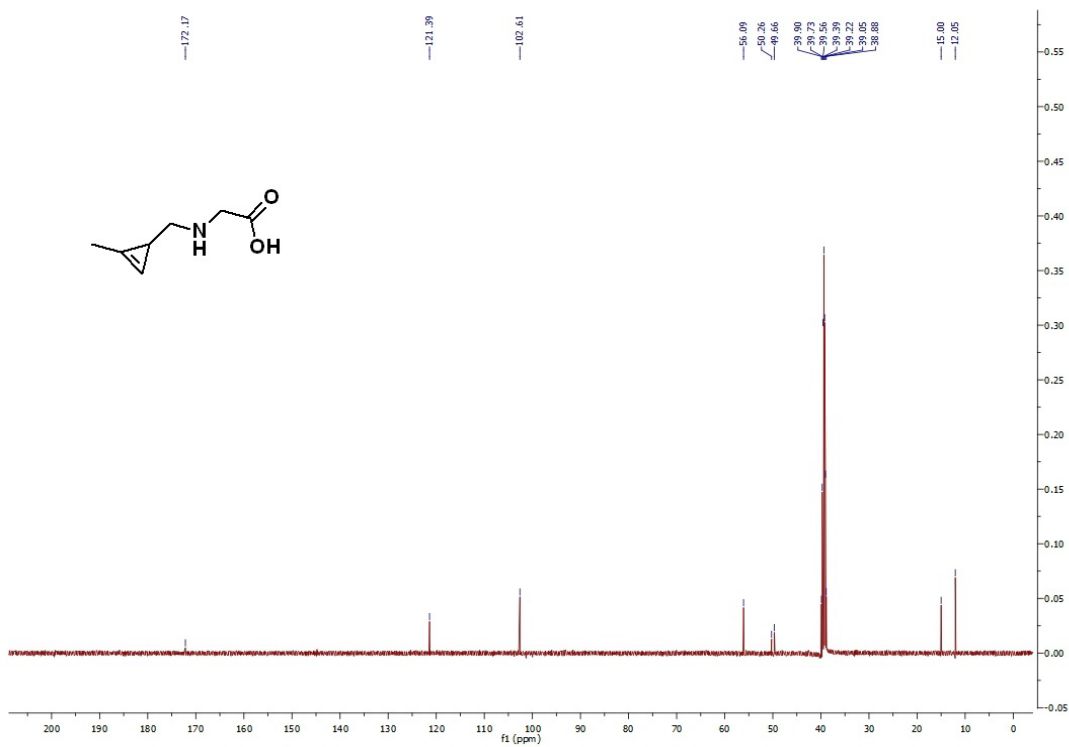

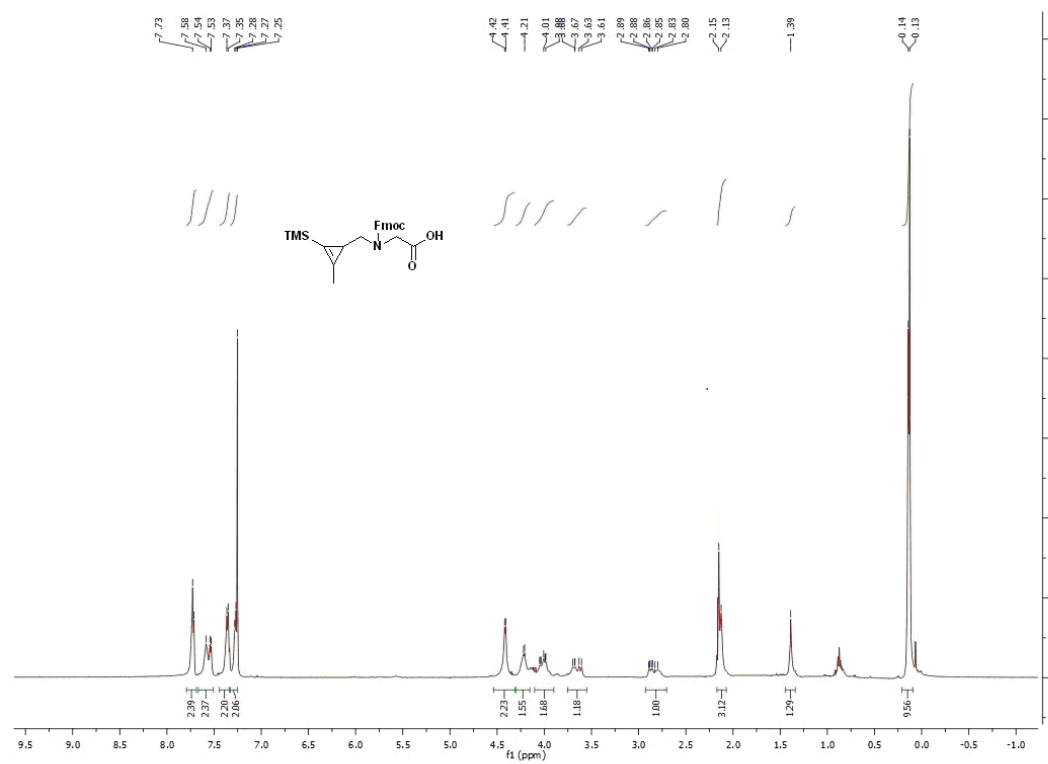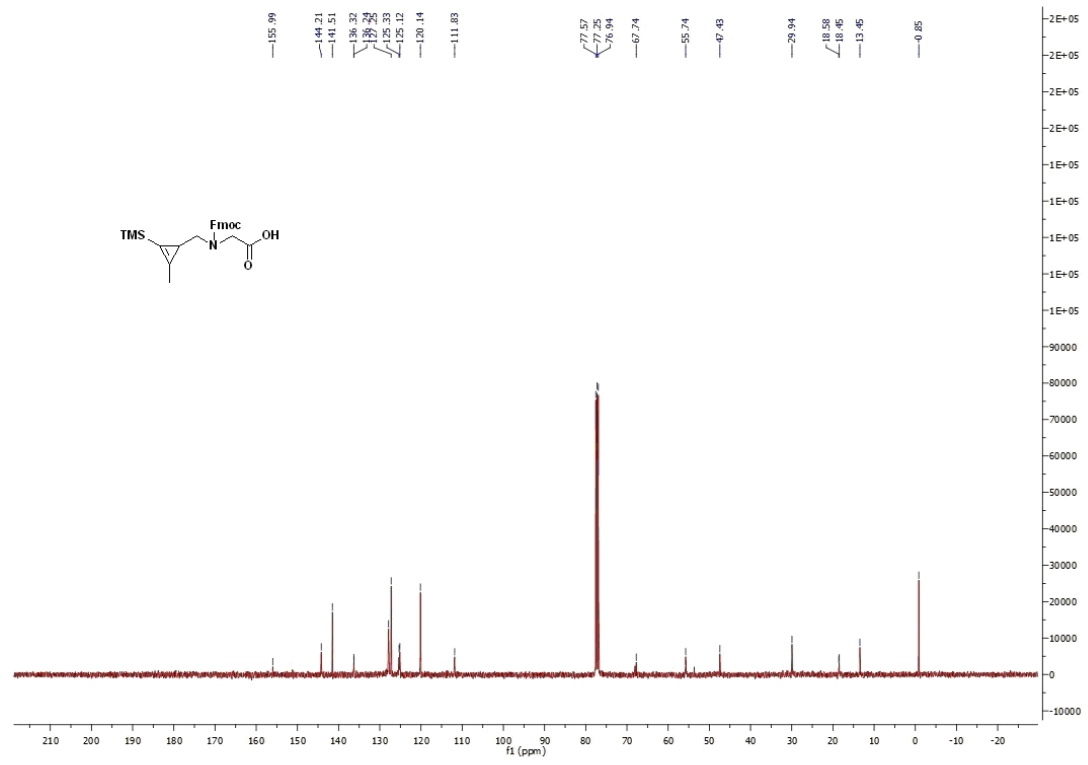



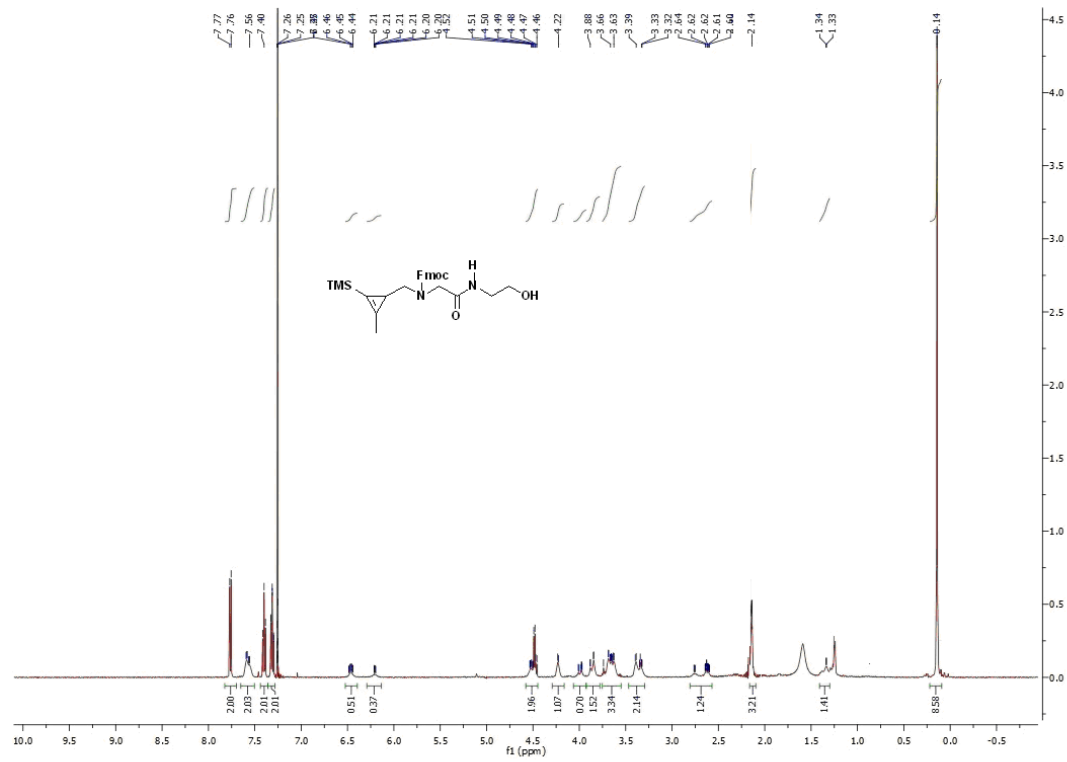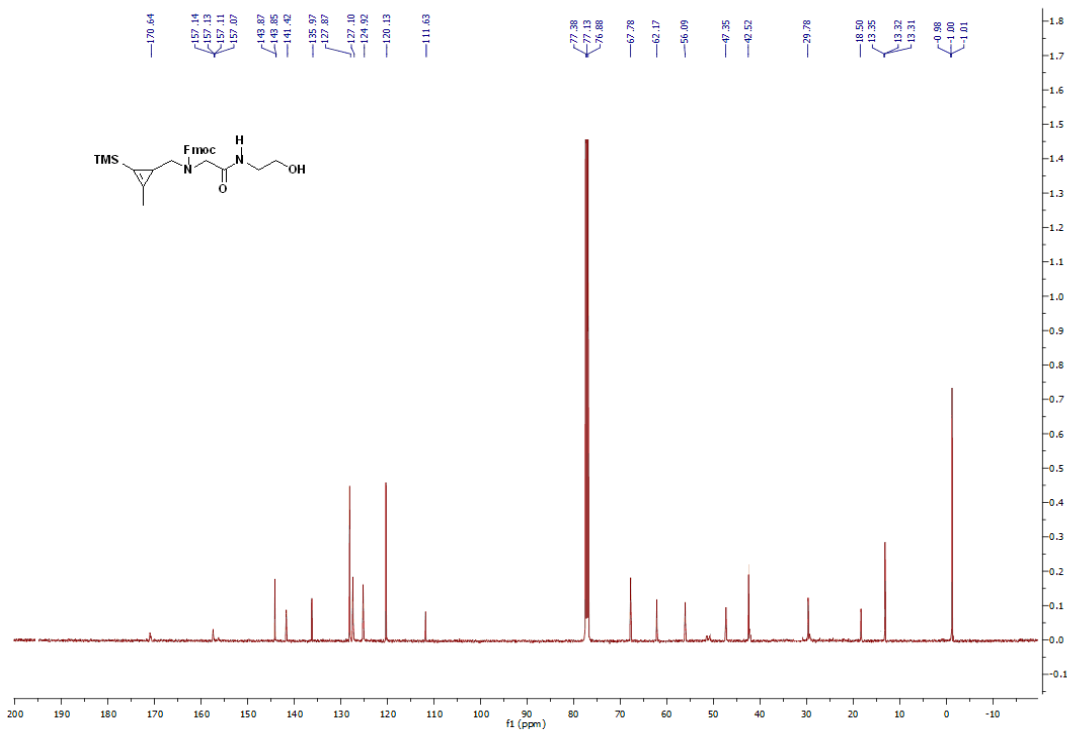

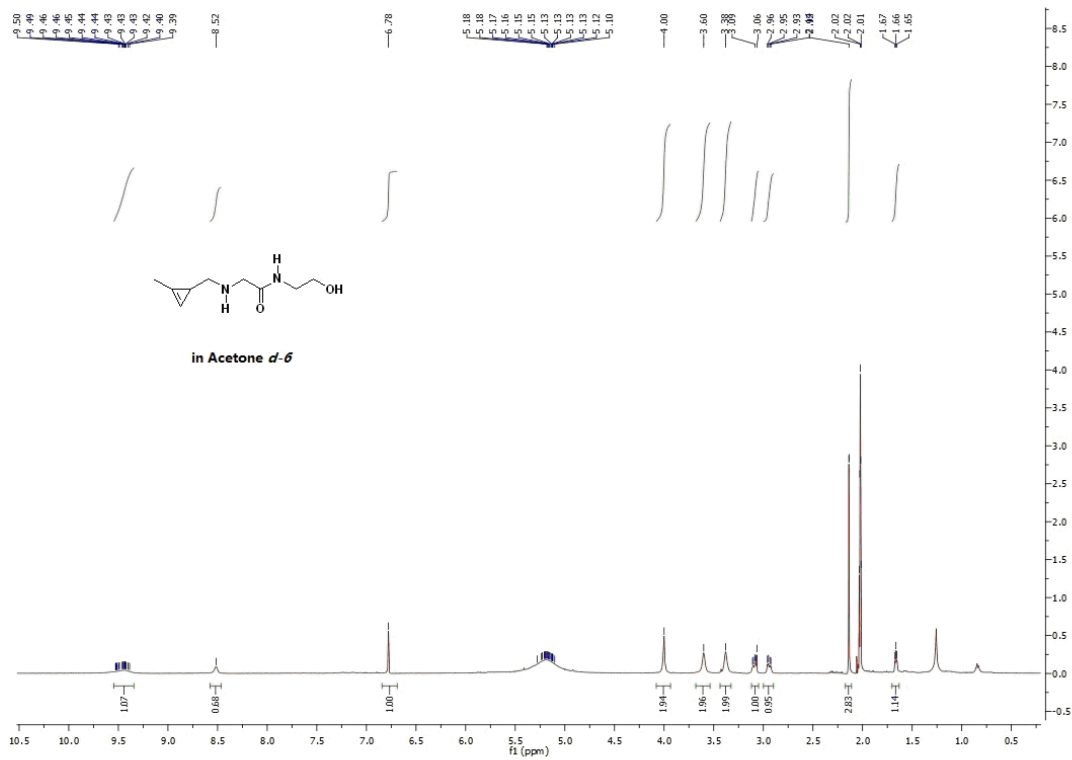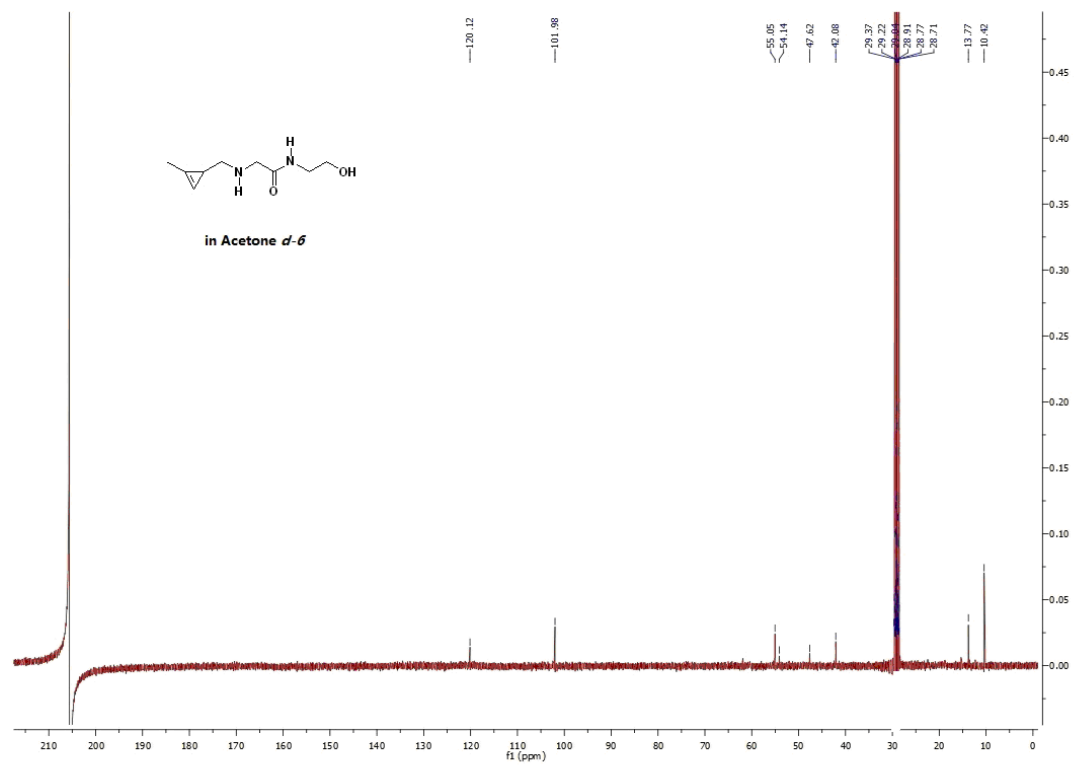

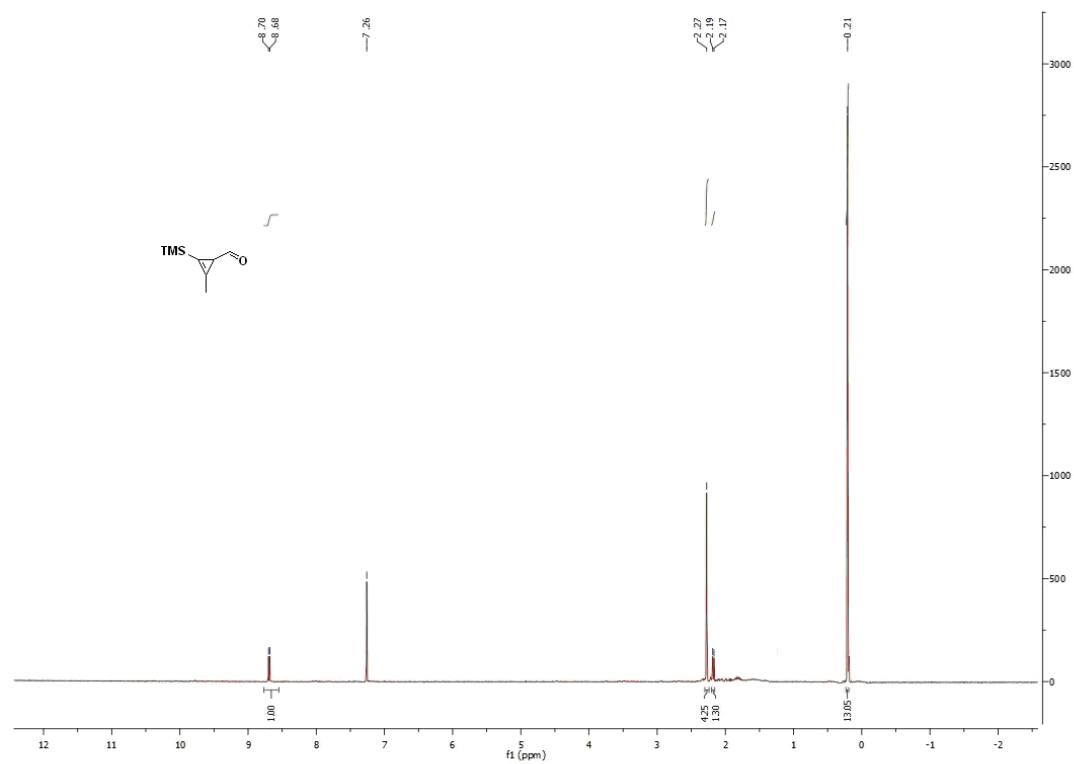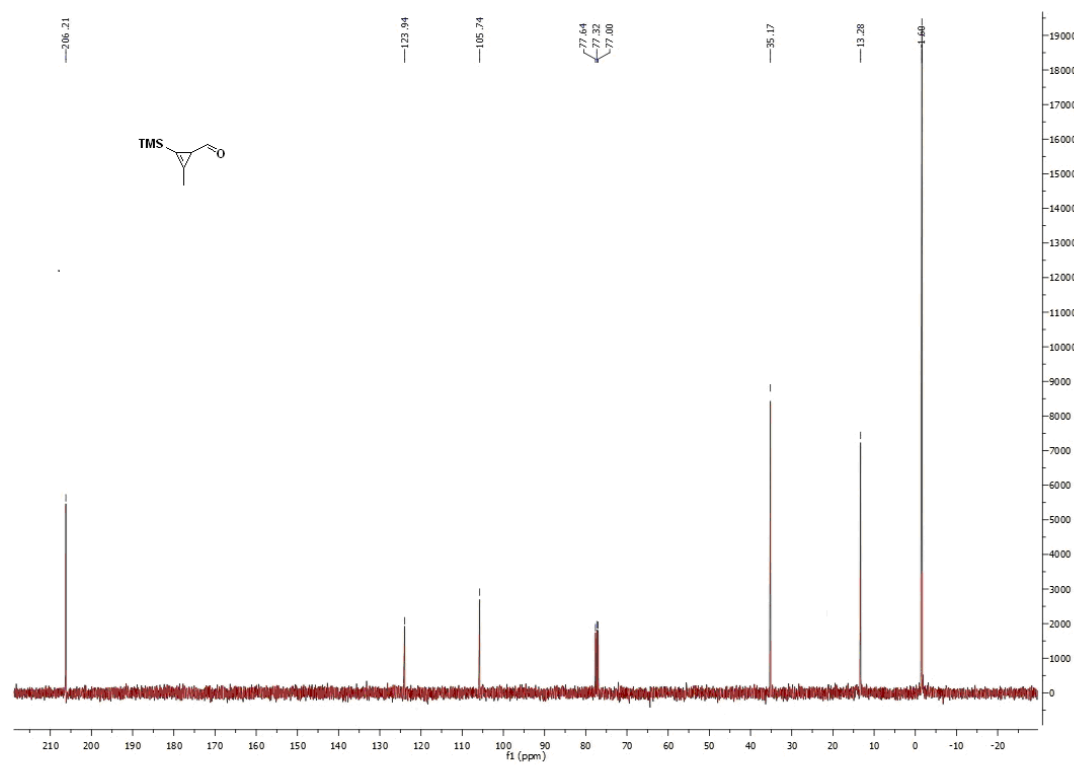

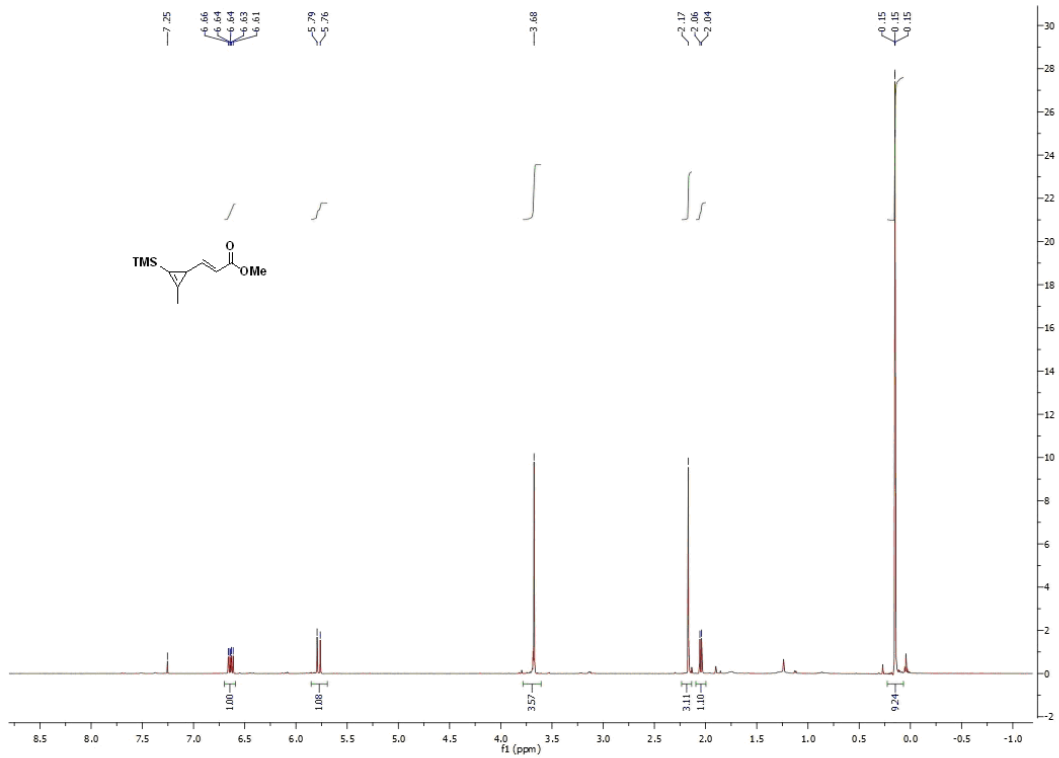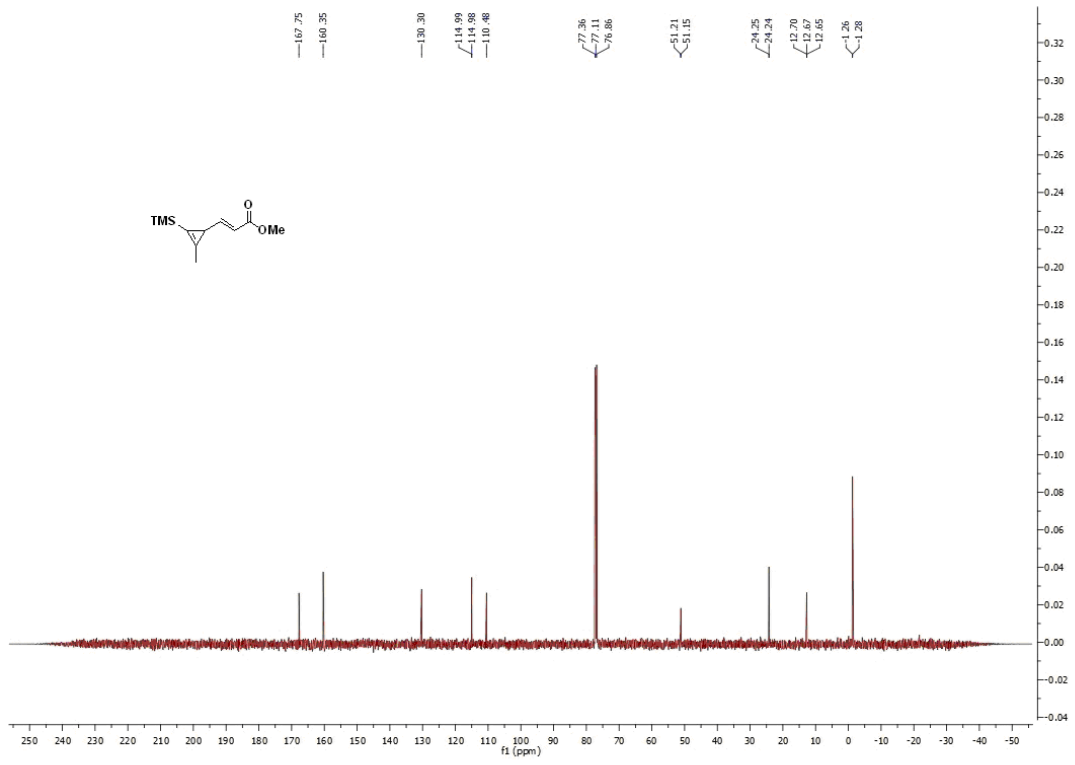

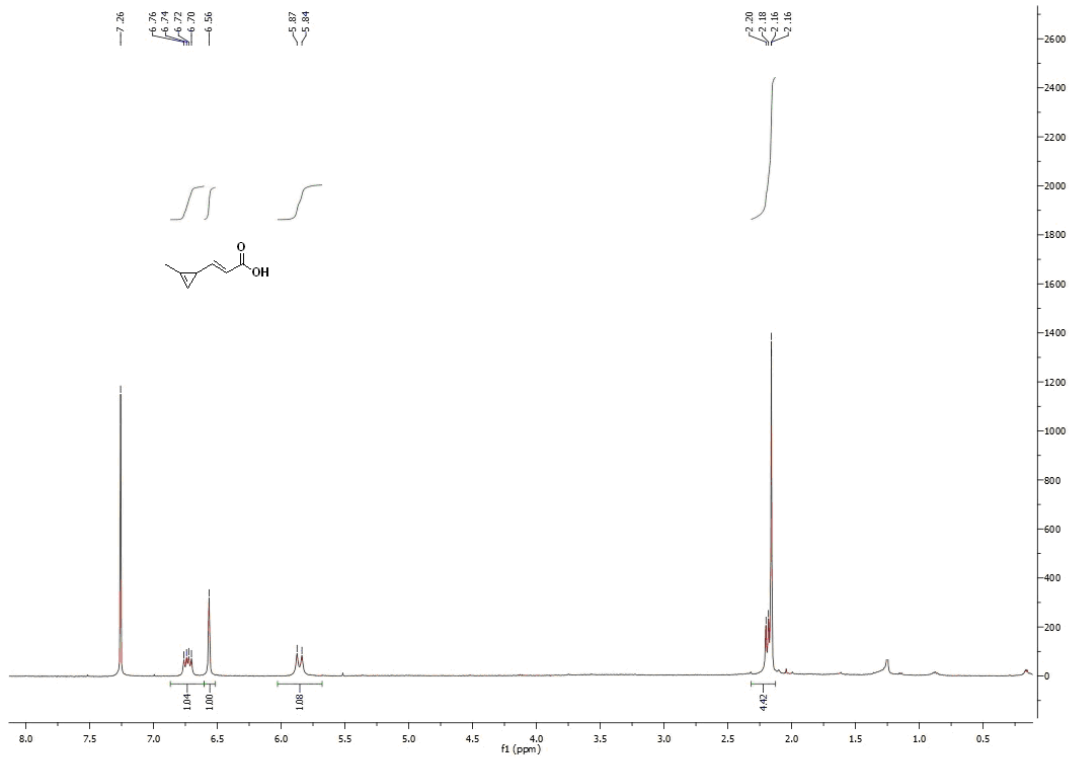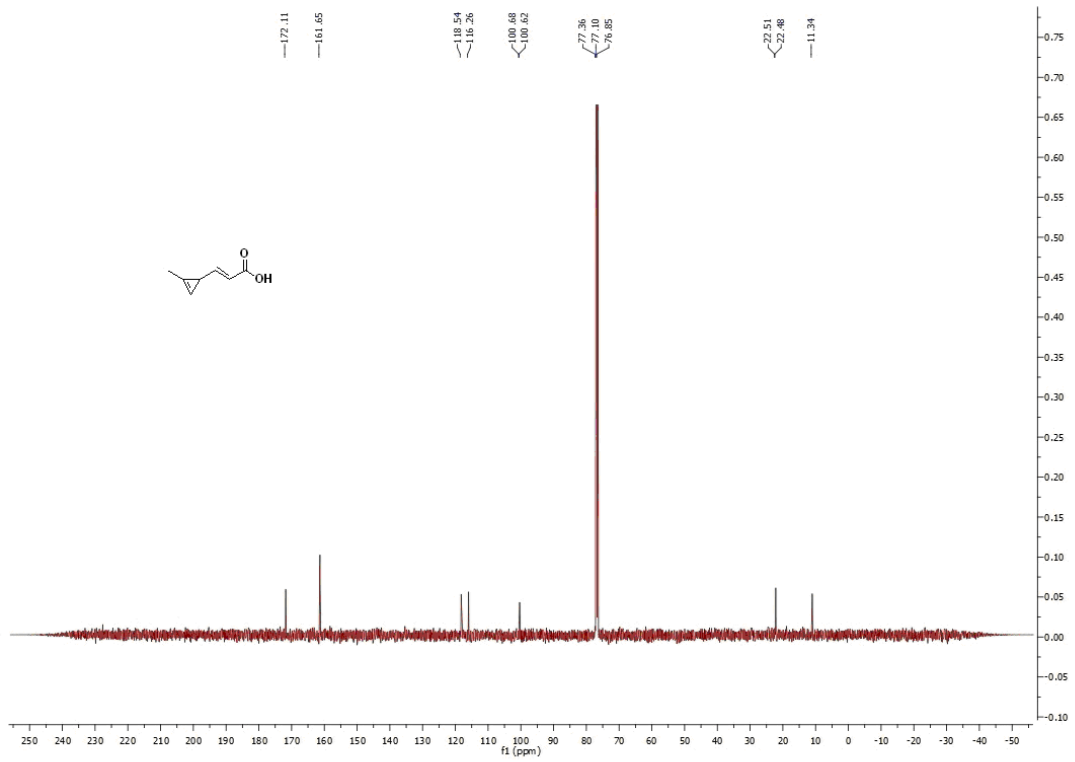

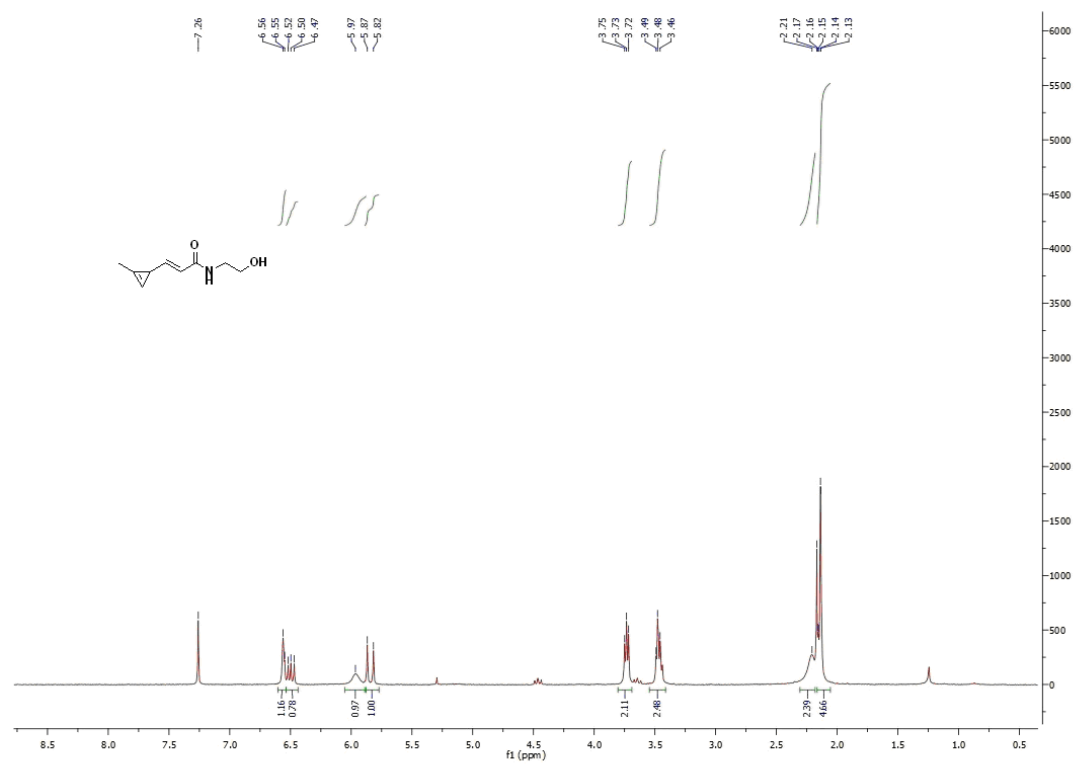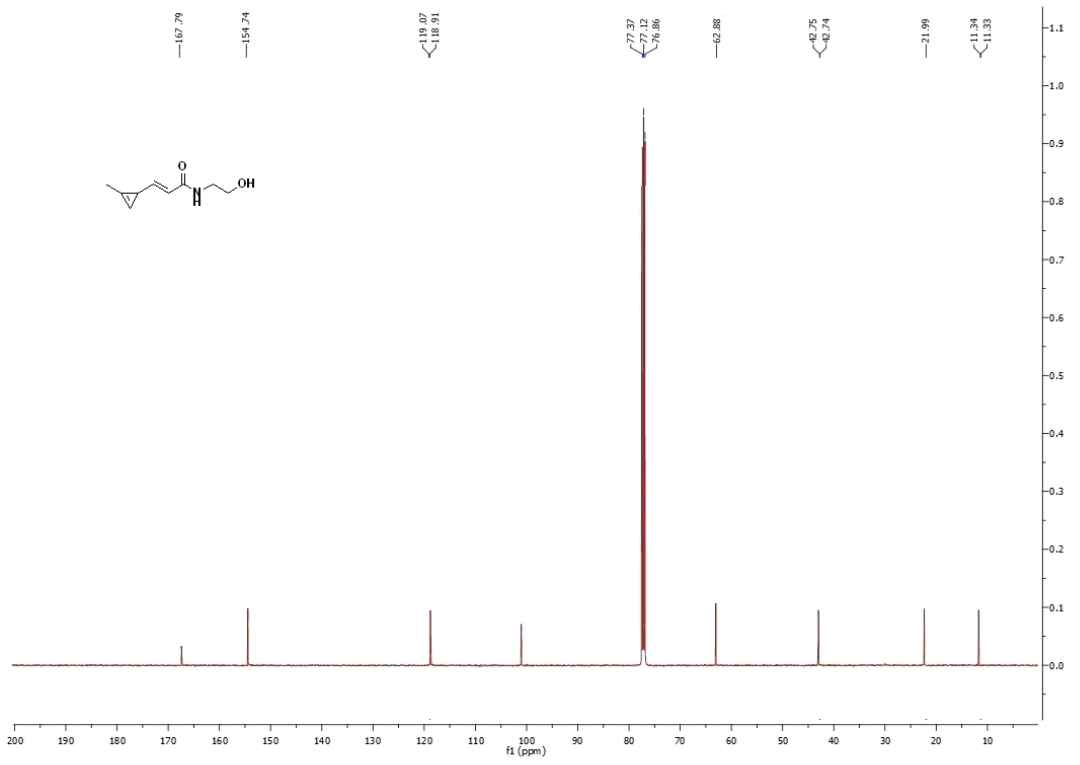

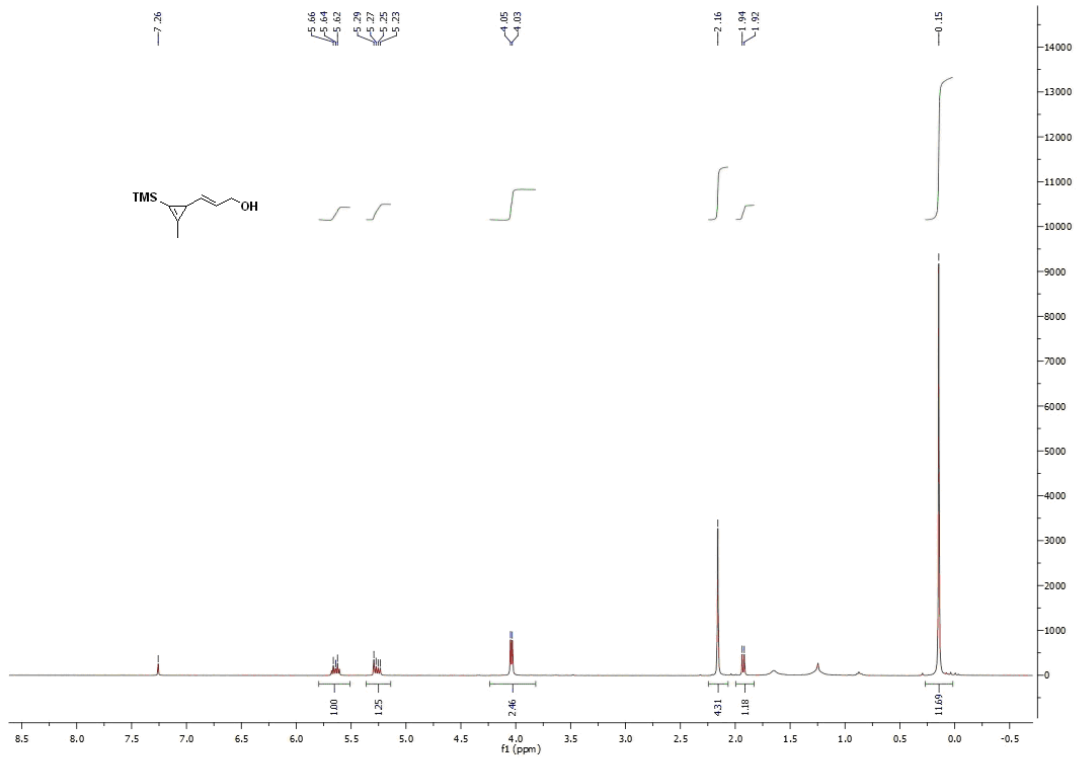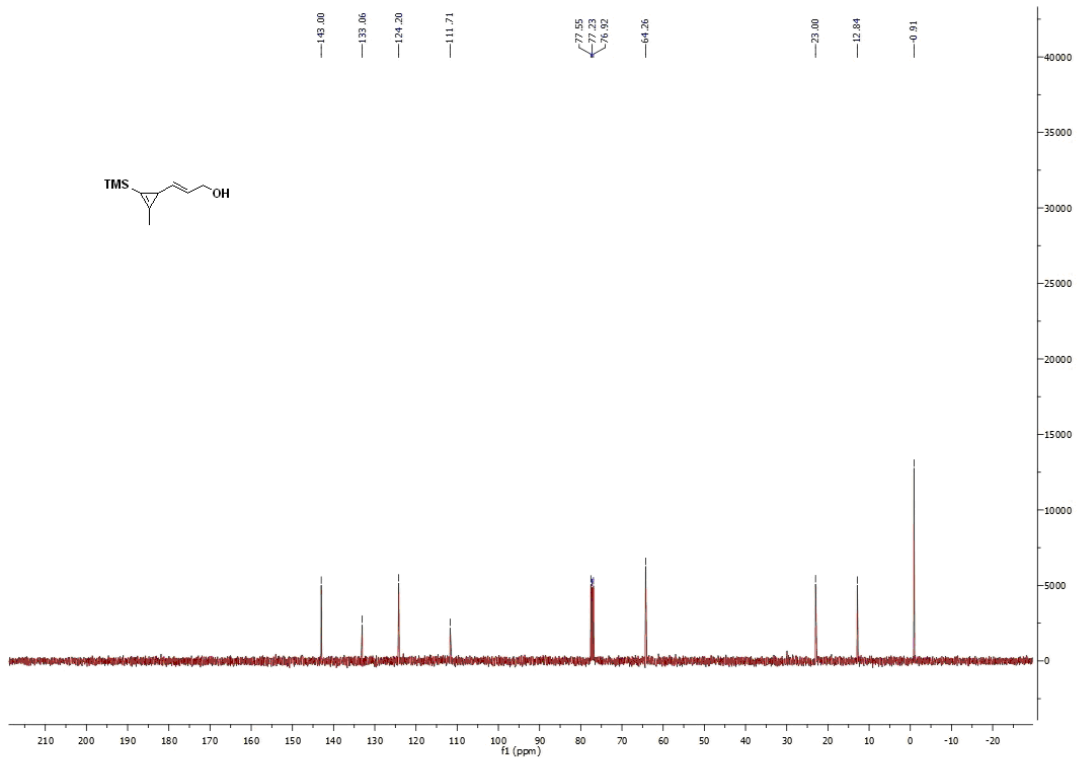

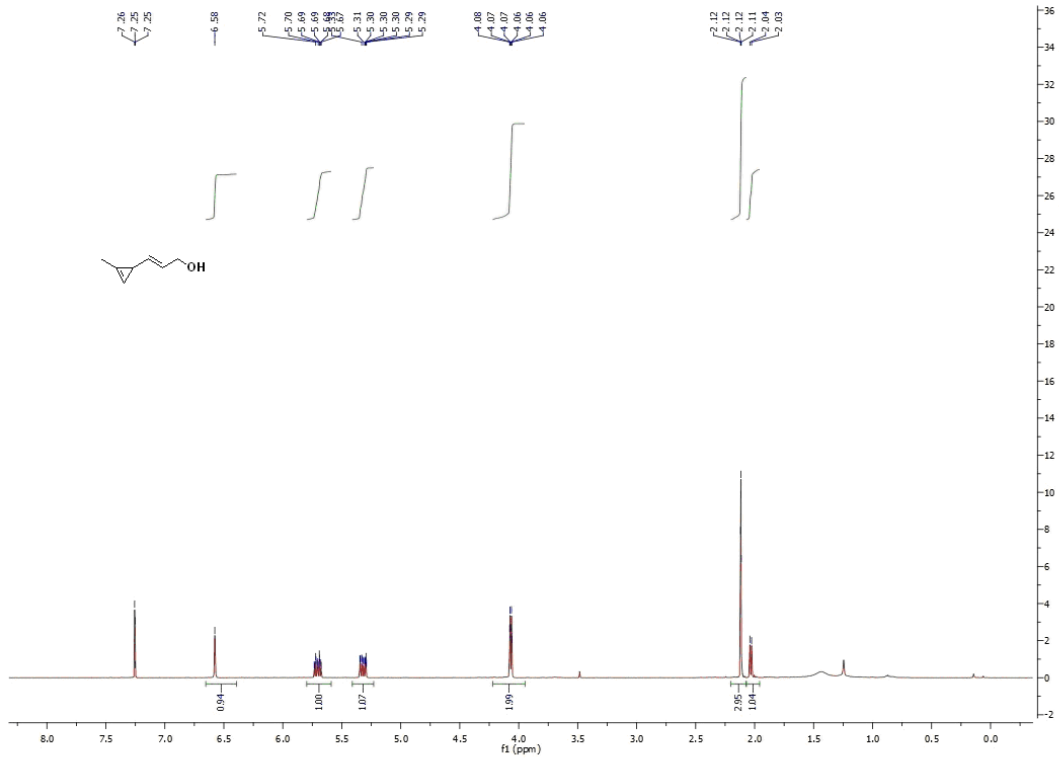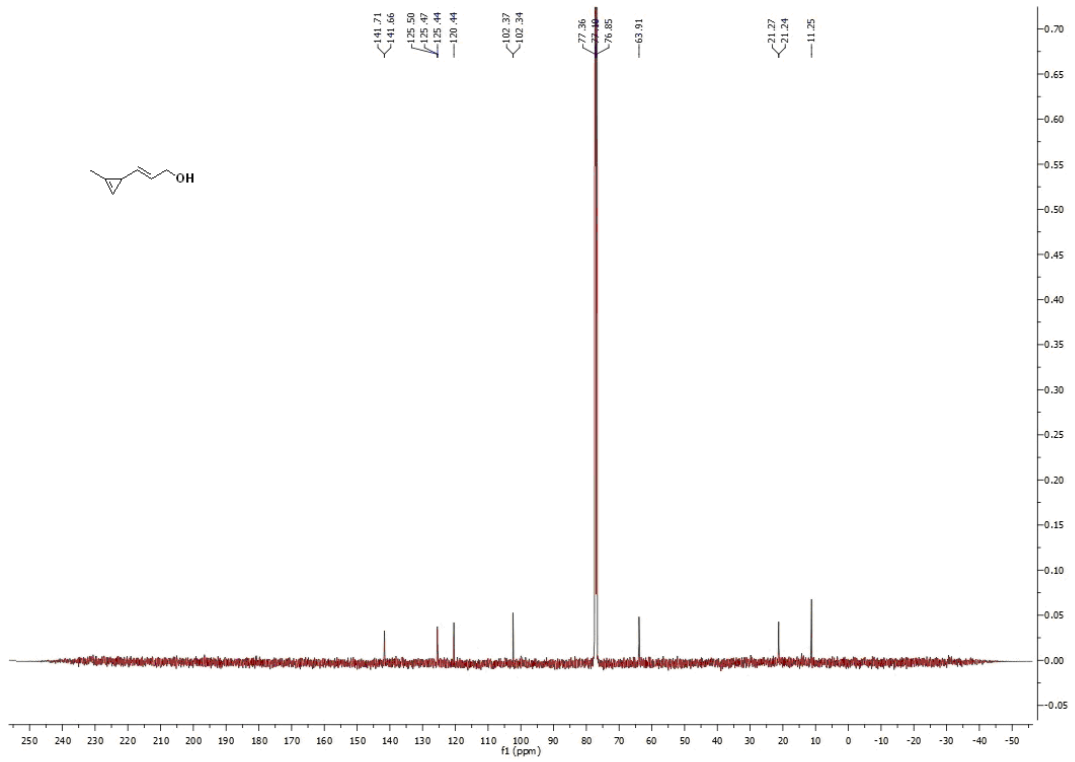



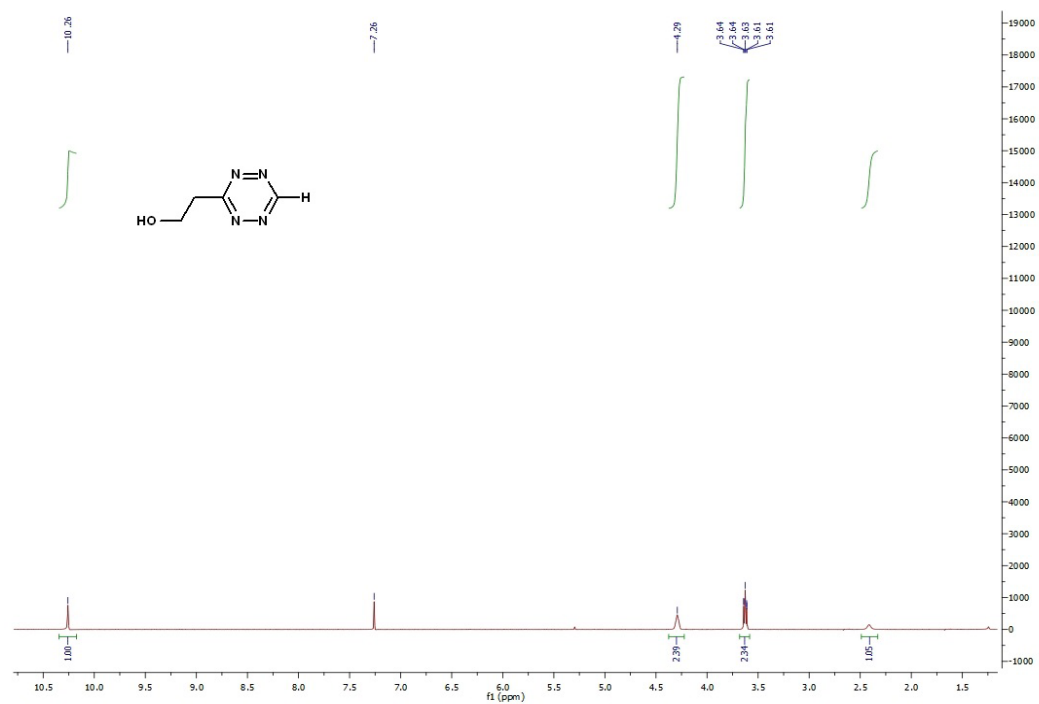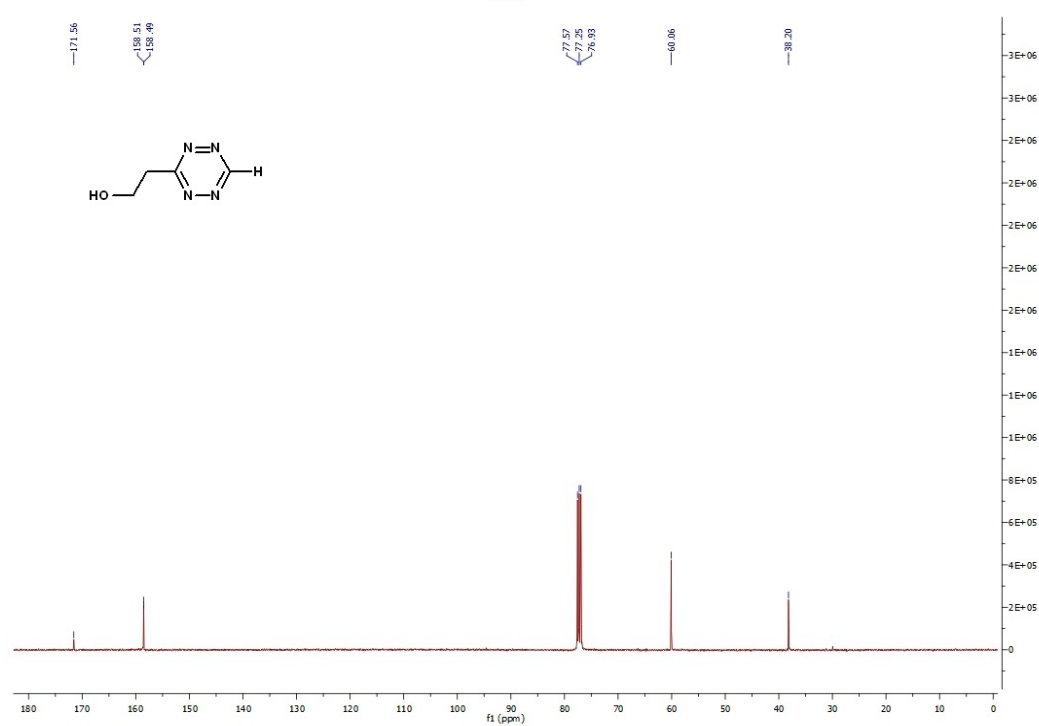

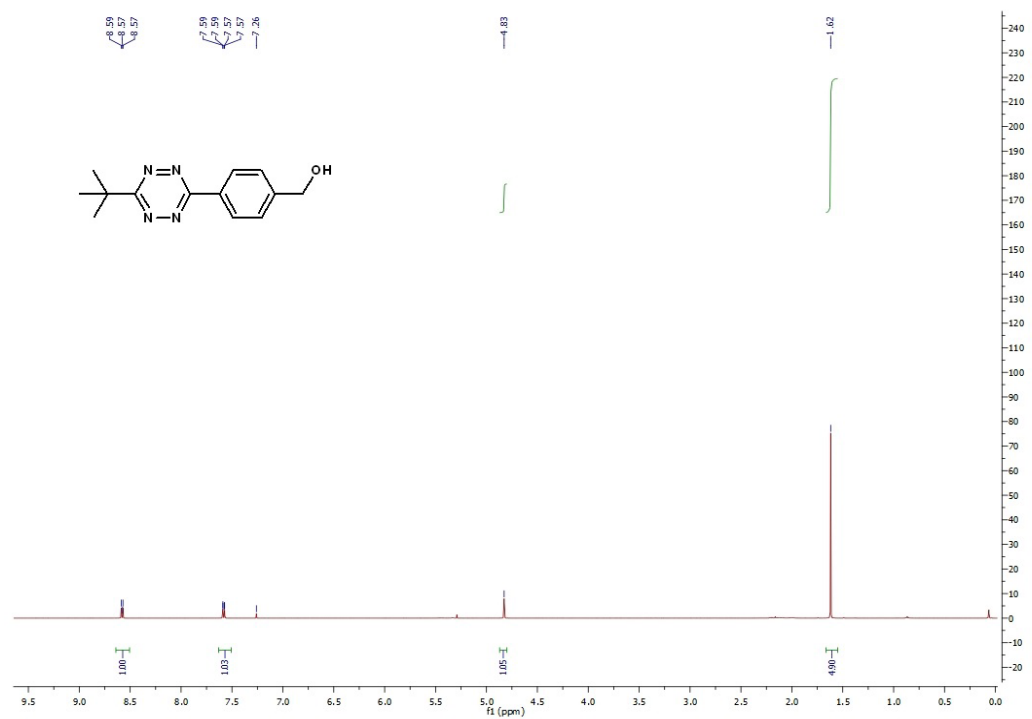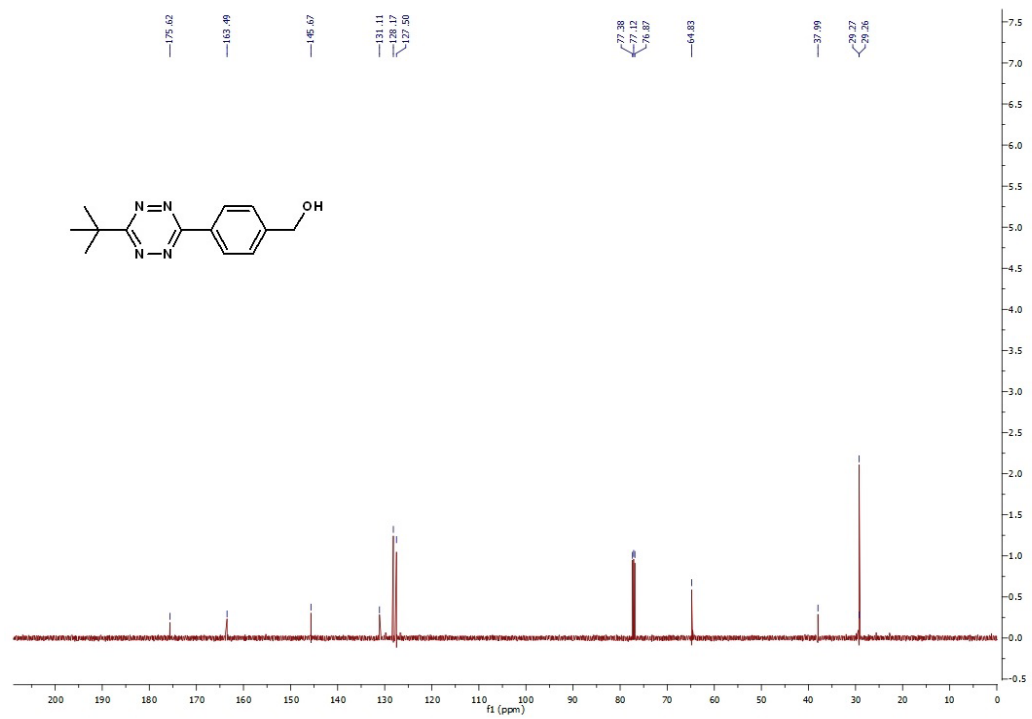

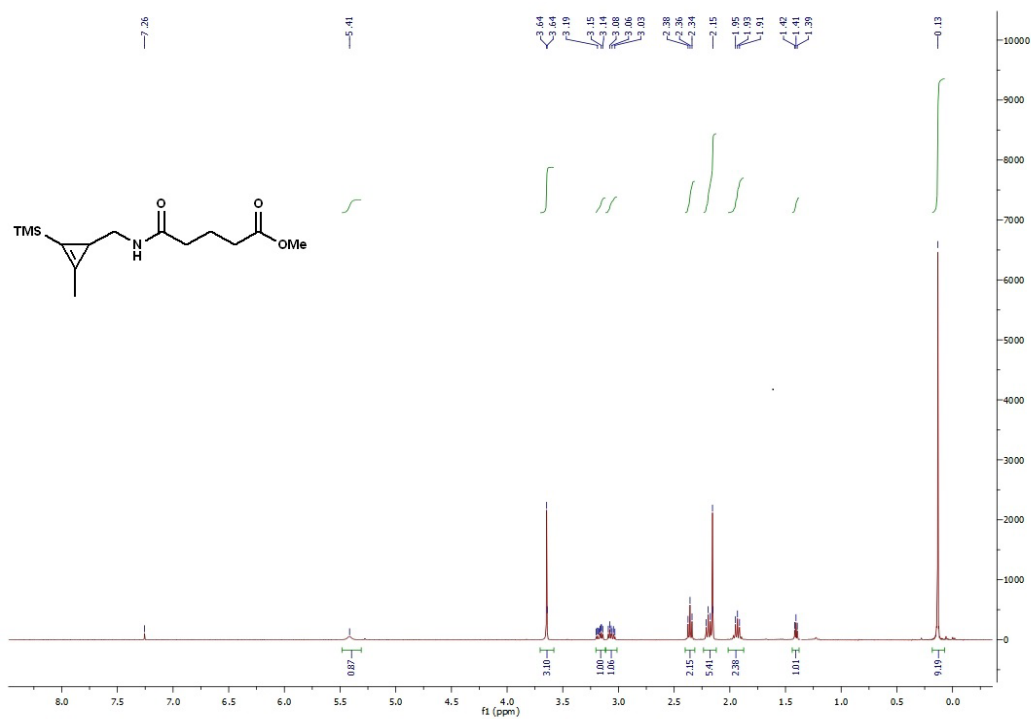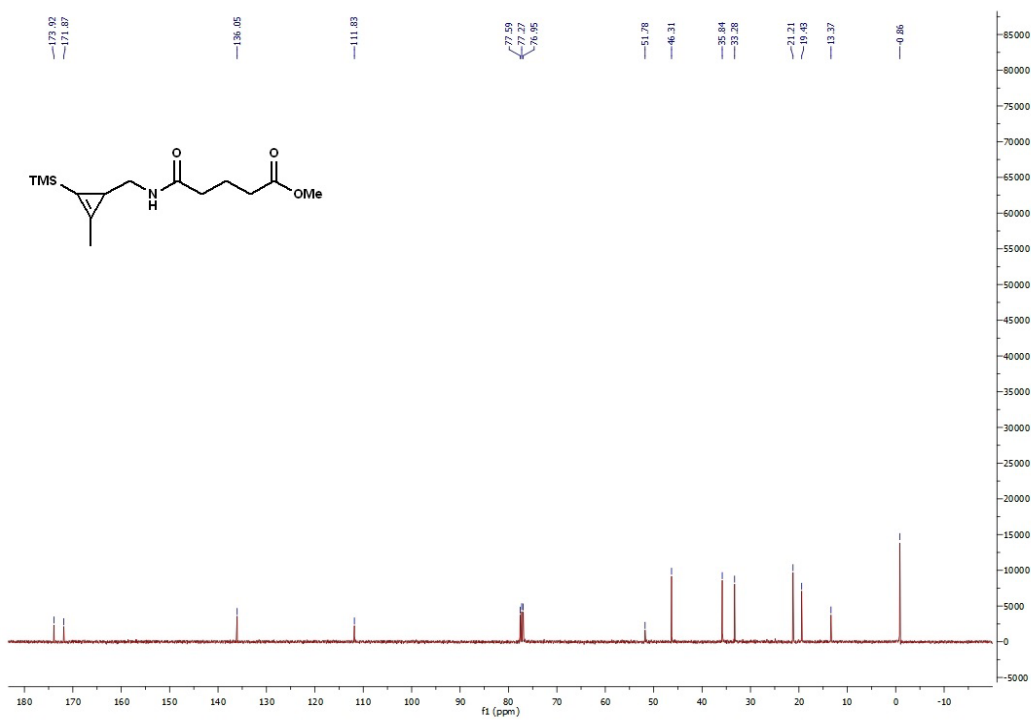

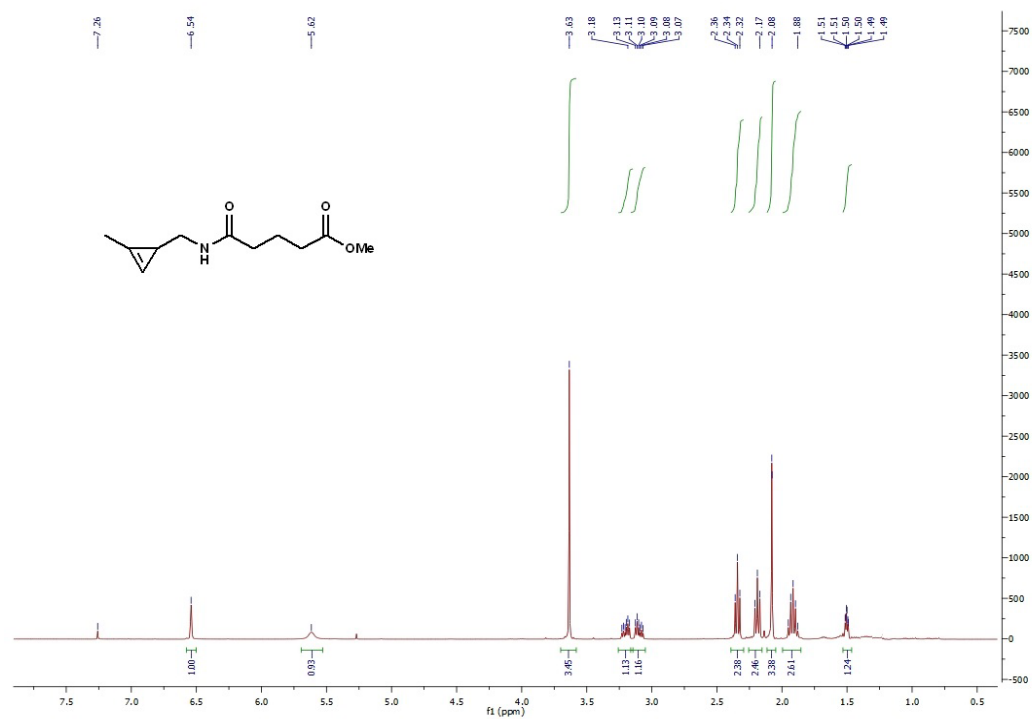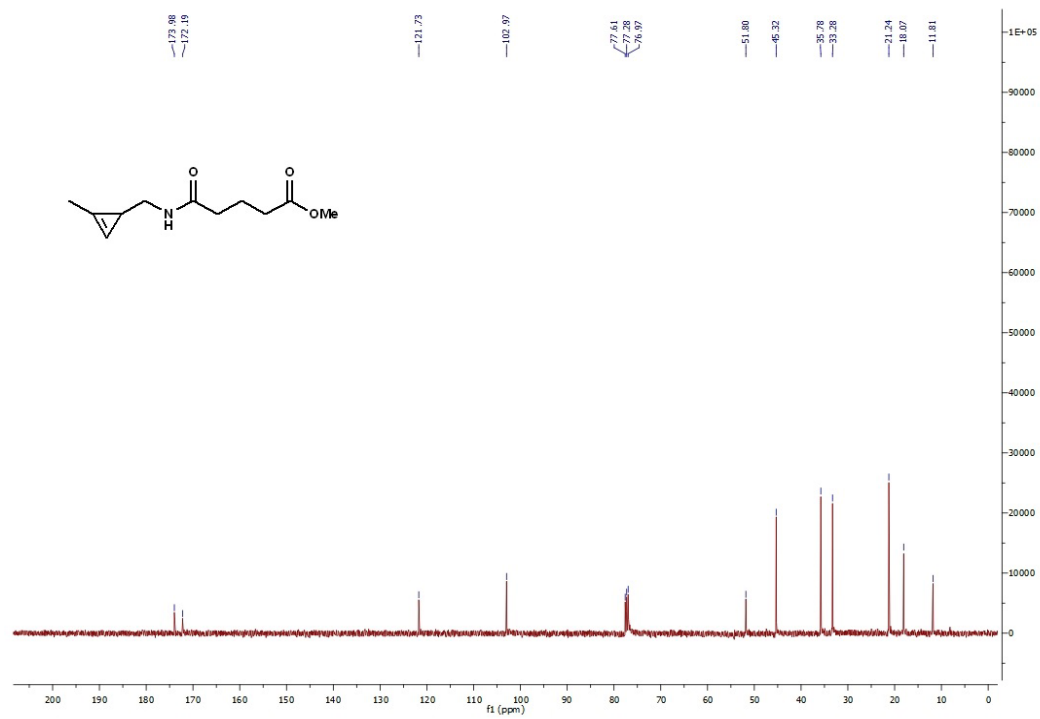

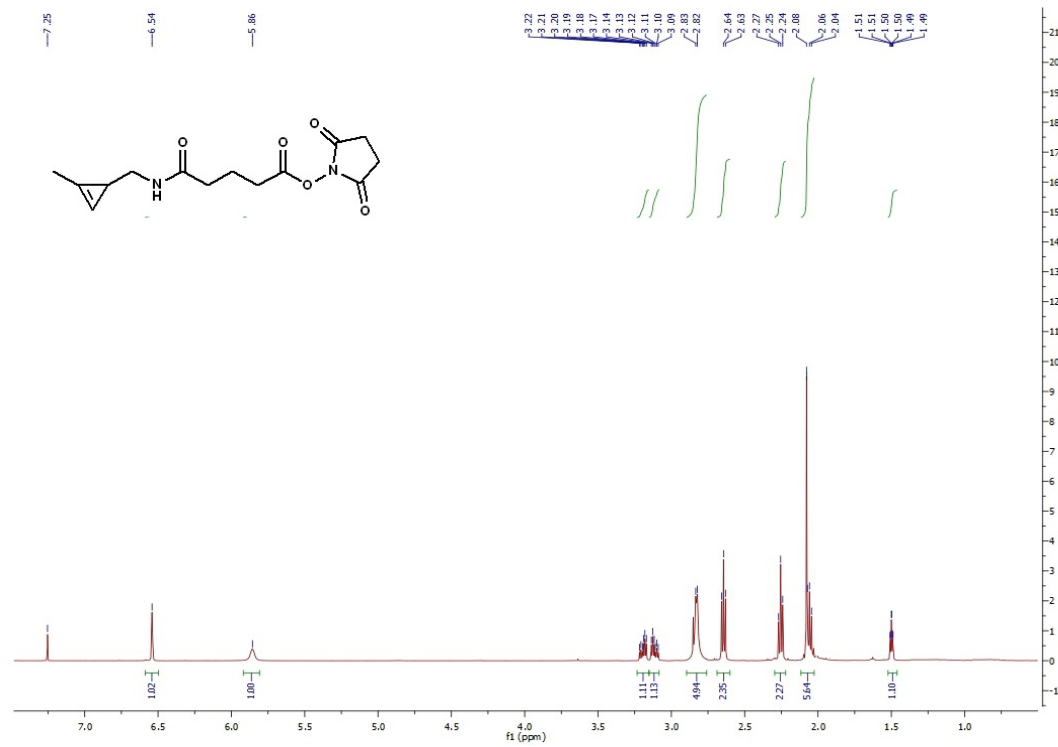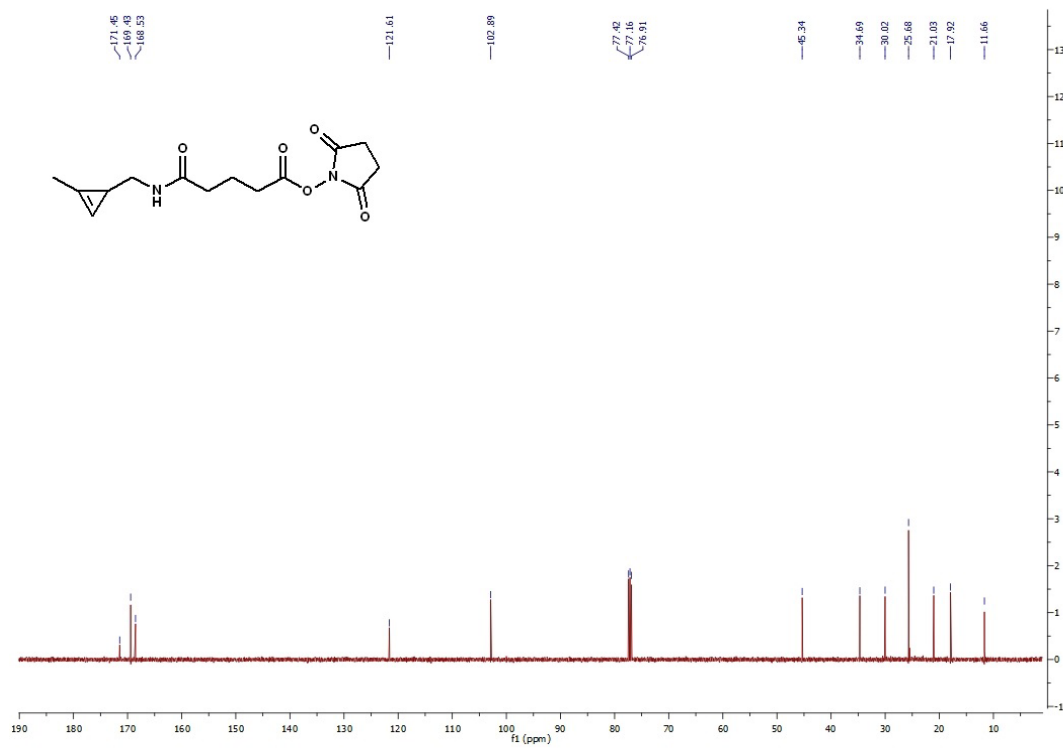

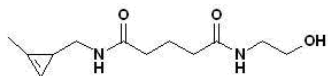

$^1\text{H}$  NMR in 20% DMSO- $d_6$ /D $_2$ O at room temperature over 4.5 hours and 37°C over 18 hours

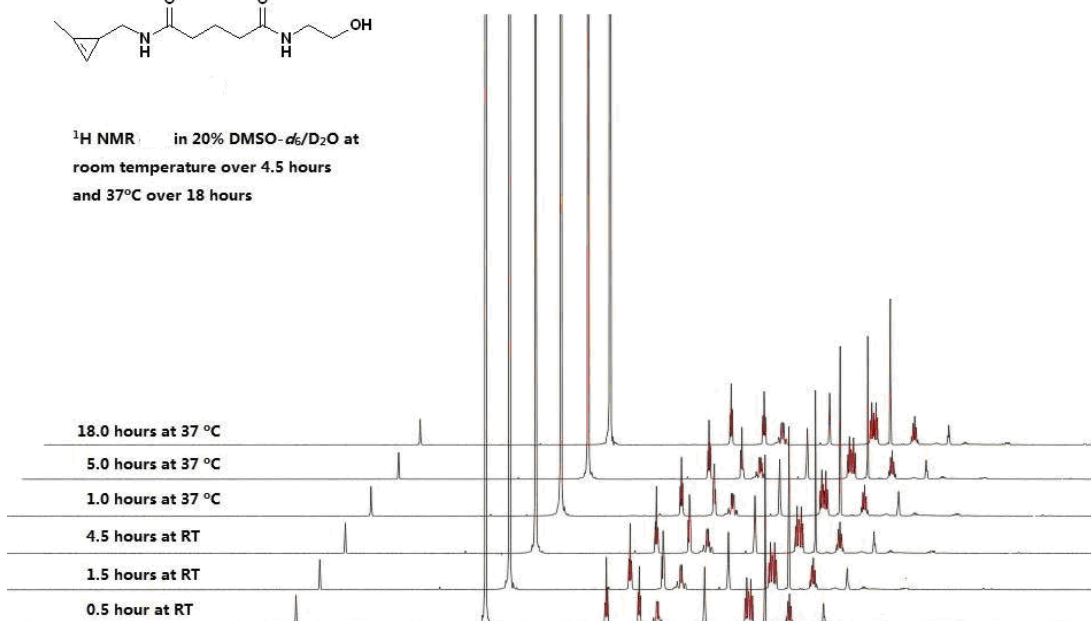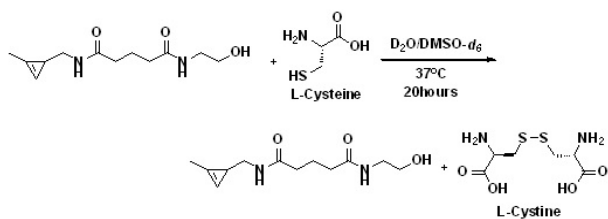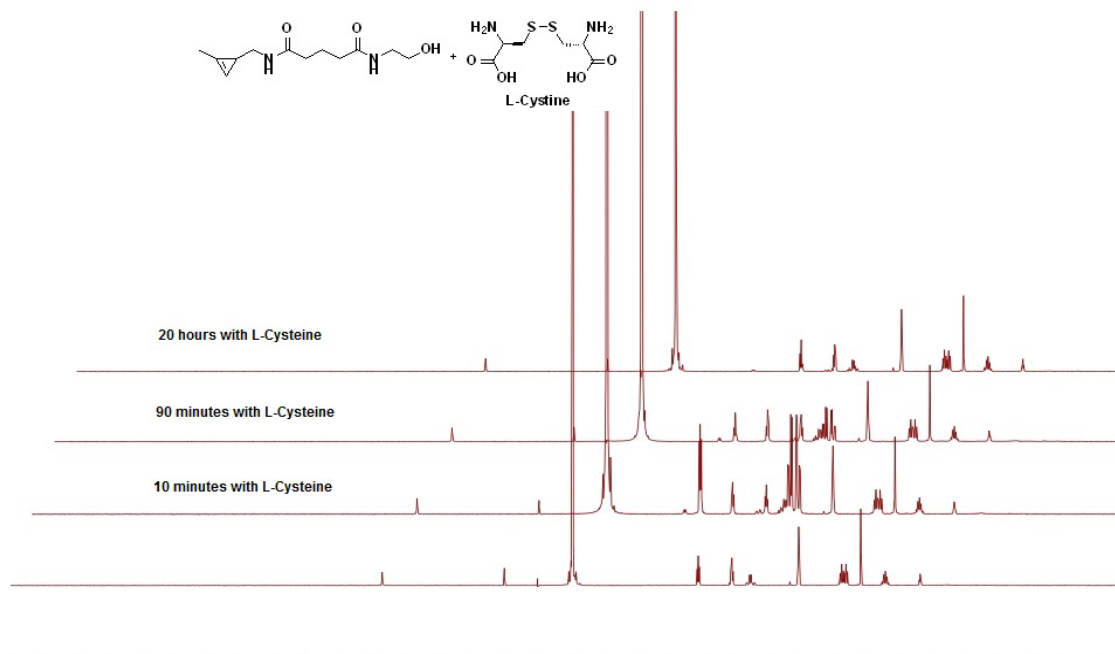

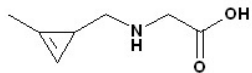

<sup>1</sup>H NMR (500MHz) in 20% DMSO-d<sub>6</sub>/D<sub>2</sub>O

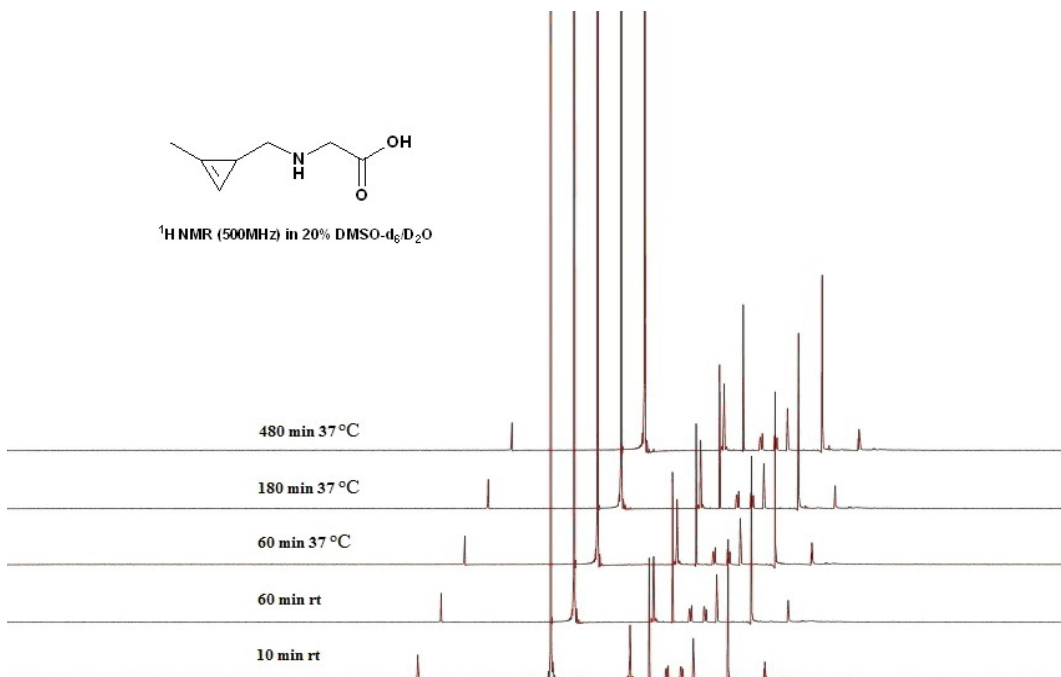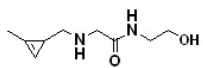

<sup>1</sup>H NMR (500MHz) in 20% DMSO-d<sub>6</sub>/D<sub>2</sub>O

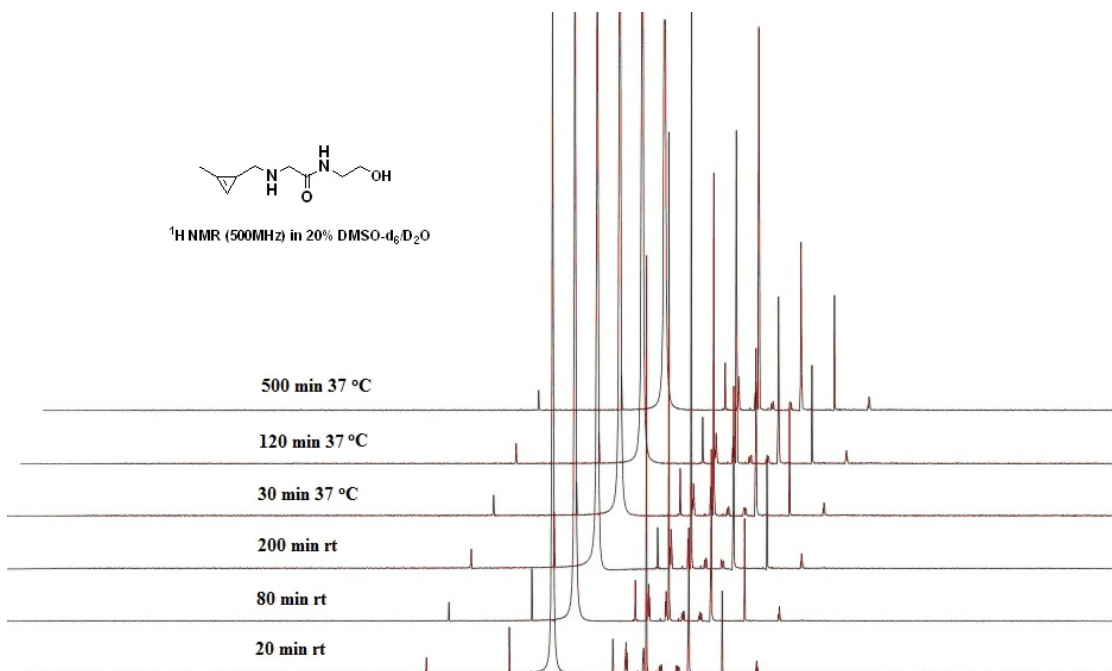

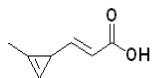

$^1\text{H}$  NMR in 20% DMSO- $d_6$ /D $_2$ O at room temperature over 4.5 hours and at 37 °C over 18 hours

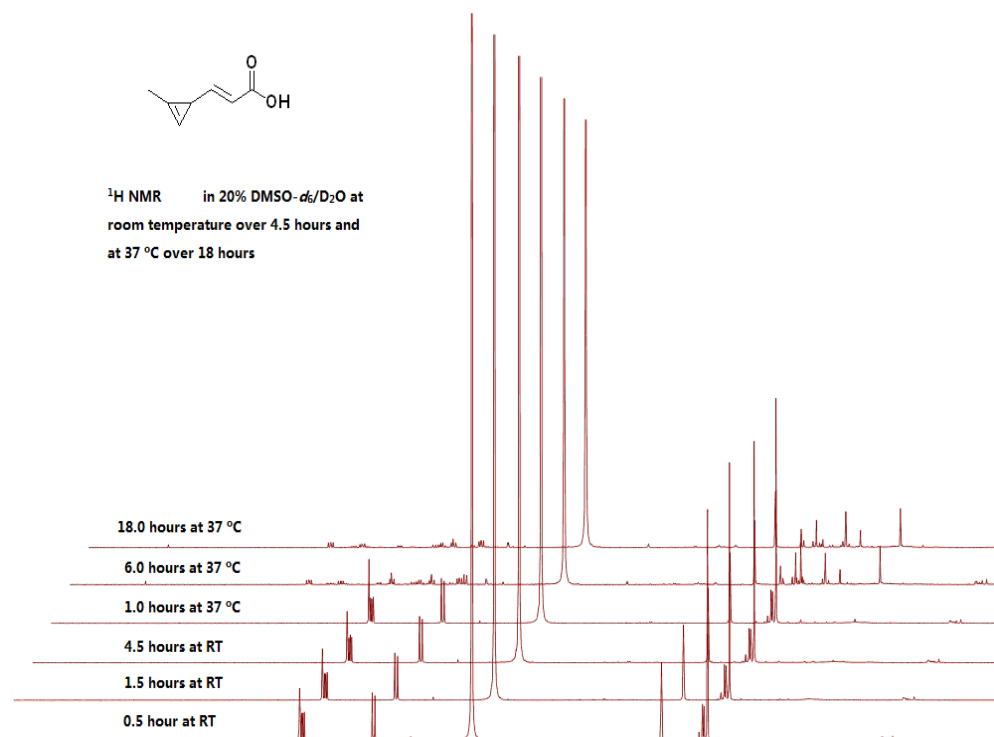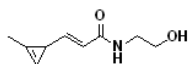

$^1\text{H}$  NMR (500MHz) in 20% DMSO- $d_6$ /D $_2$ O

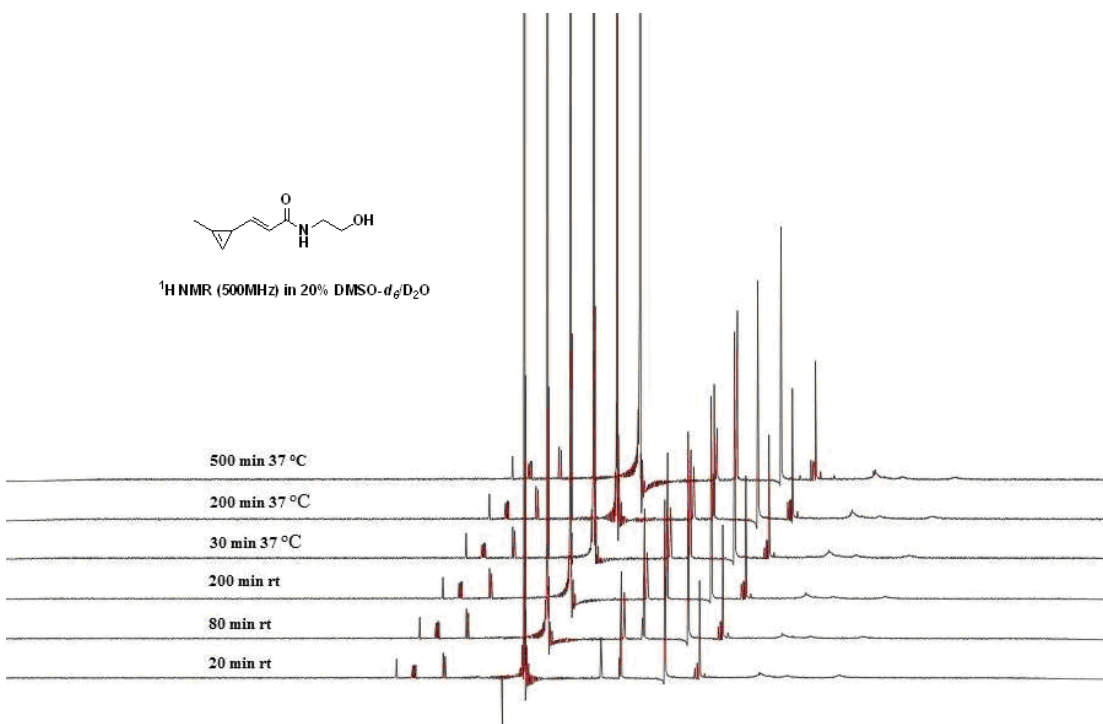



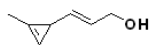

<sup>1</sup>H NMR in 20% DMSO-*d*<sub>6</sub>/D<sub>2</sub>O  
at room temperature over 22 hours

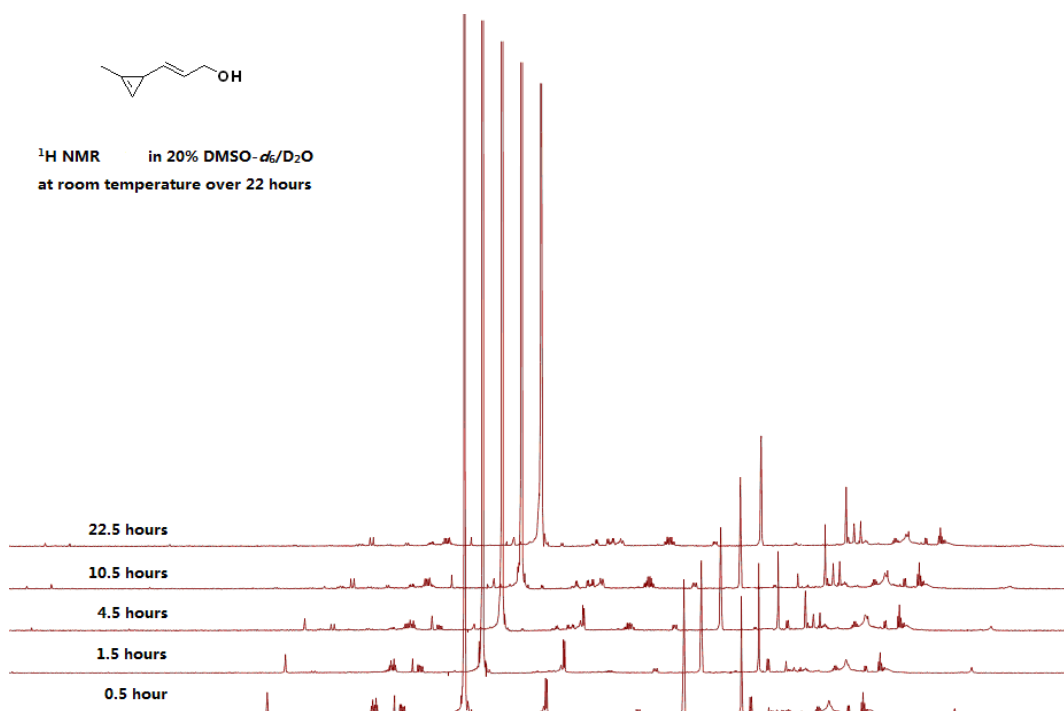

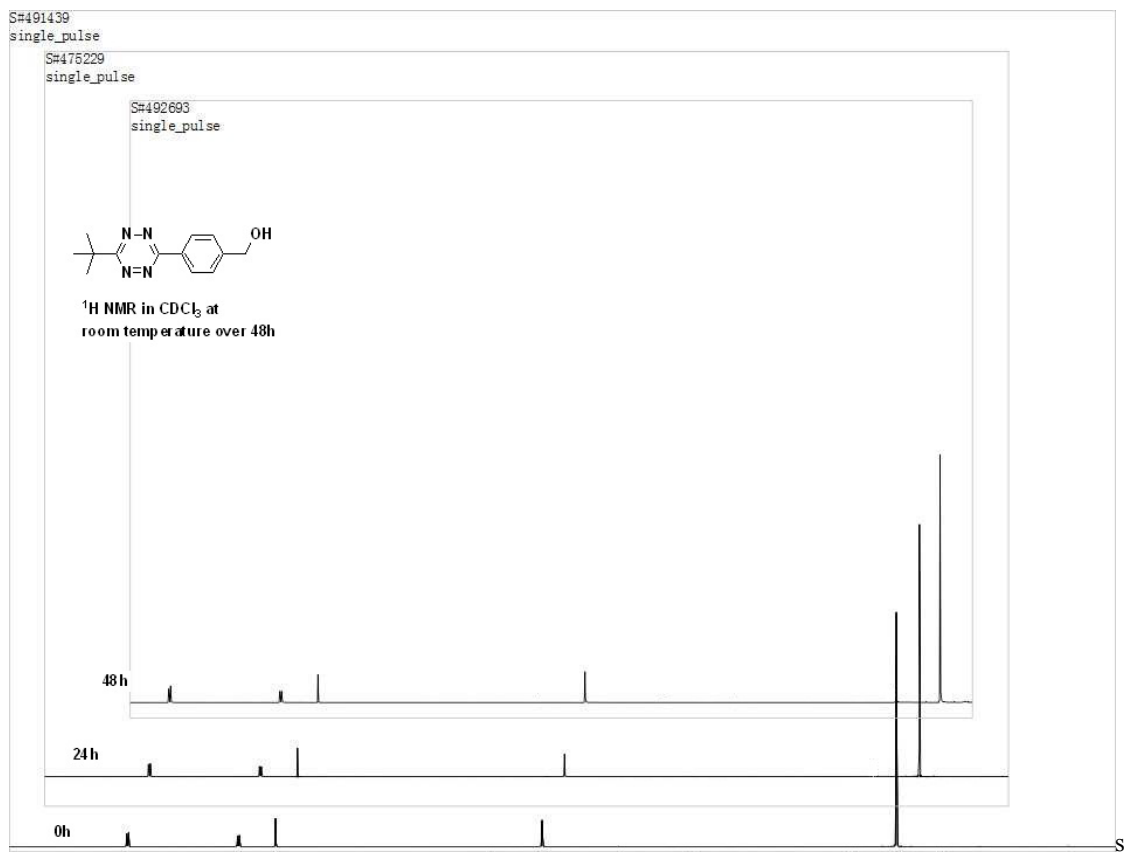

sample was kept in ambient lighting during stability experiment

Y130830tertycamide #395-415 RT: 6.00-6.23 AV: 21 SB: 40 4.81-5.39 NL: 1.43E8  
T: + c ESI Full ms [ 150.00-800.00]

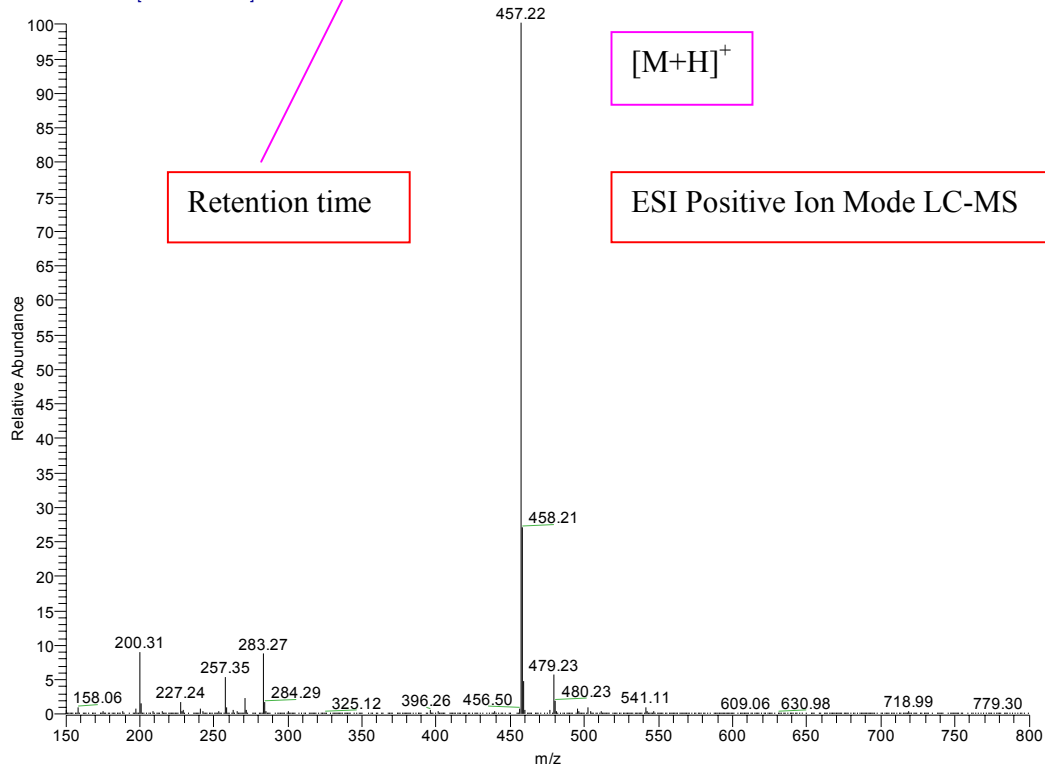

RT: 0.00 - 19.99 SM: 3B

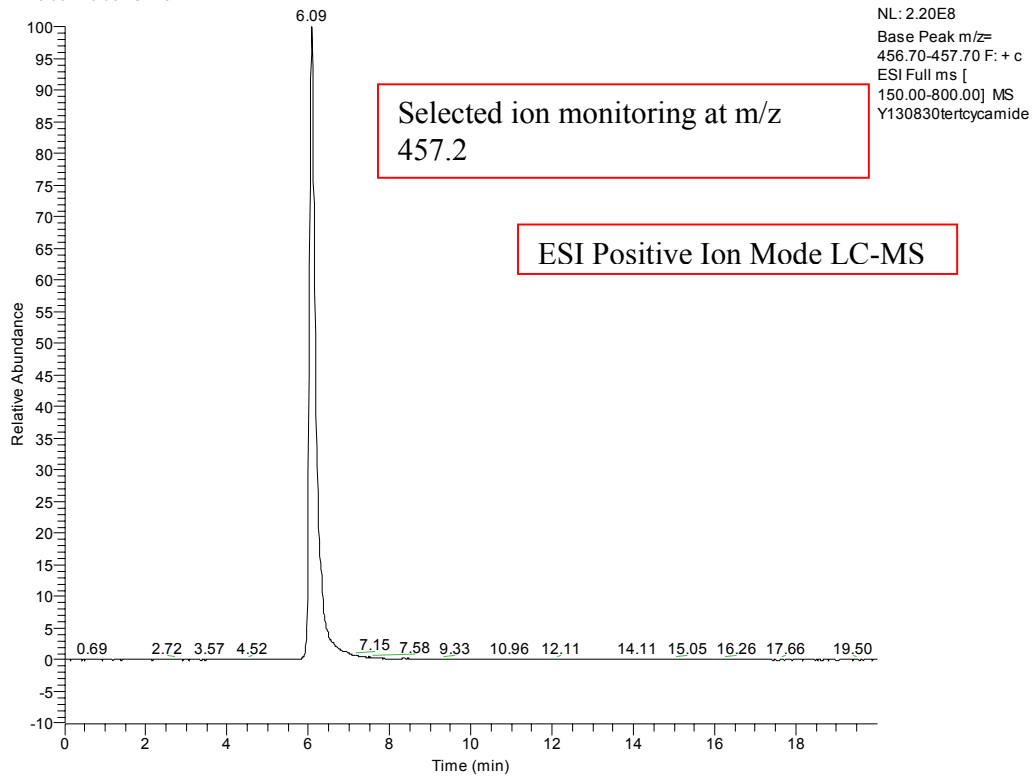

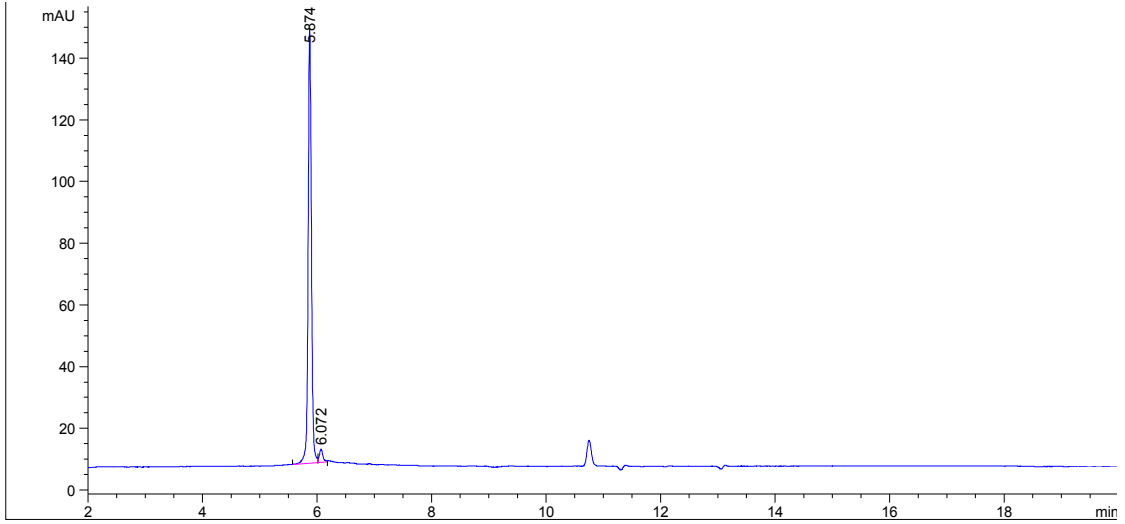

=====  
 Area Percent Report  
 =====

Sorted By : Signal  
 Multiplier: : 1.0000  
 Dilution: : 1.0000  
 Use Multiplier & Dilution Factor with ISTDs

Signal 1: MWD1 B, Sig=280,6 Ref=600,20  
 Signal has been modified after loading from rawdata file!

| Peak # | RetTime [min] | Type | Width [min] | Area [mAU*s] | Height [mAU] | Area %  |
|--------|---------------|------|-------------|--------------|--------------|---------|
| 1      | 5.874         | BV   | 0.0604      | 561.36523    | 141.14607    | 96.7316 |
| 2      | 6.072         | VB   | 0.0644      | 18.96776     | 4.30873      | 3.2684  |
